# Supplementary material for: Effects of Various Feed Additives on Finishing Pig Growth Performance and Carcass Characteristics: A Review
Source: MDPI journal article supplement (doi:10.3390/ani13020200), 2023-01-05
Supplement: s1 [file s1]

# **Effects of Various Feed Additives on Finishing Pig Growth Performance and Carcass**

## **Characteristics: A Review—Supplemental Material**

Zhong-Xing Rao 1, Mike D. Tokach 1, Jason C. Woodworth 1, Joel M. DeRouchey 1, Robert D.

Goodband 1,\* and Jordan T. Gebhardt 2

<sup>1</sup> Department of Animal Sciences and Industry, College of Agriculture, Kansas State

University, Manhattan, KS, USA 66506

<sup>2</sup> Department of Diagnostic Medicine/Pathobiology, College of Veterinary Medicine, Kansas

State University, Manhattan, KS, USA 66506

\*Corresponding author: [Goodband@ksu.edu](mailto:Goodband@ksu.edu)

### **1. Feed Additives – Health**

This section discusses the feed additives that have the potential to improve growth performance and carcass characteristics by enhancing the health status of grow-finish pigs.

The feed additives discussed are acidifiers, essential oils, DFM, yeasts, Cu, and Zn.

### *1.1. Acidifiers*

There were 32 research articles for acidifiers with 68 comparisons from 16 countries during the grow-finish or finishing period which met the requirements for inclusion. Of these, 68 comparisons reported growth performance data and 42 comparisons reported carcass data. Most acidifiers collected for this review were organic acids that were in the form of short-chain fatty acids (**SCFA**; 39 comparisons), medium-chain fatty acids (**MCFA**; 1 comparison), and benzoic acid (10 comparisons), and were added alone or in combinations (SCFA and MCFA; 18 comparisons) from 0.05 to 5.0% in the diets.

#### *1.1.1. Growth performance - Acidifiers*

Average daily gain significantly increased ( $P \leq 0.05$ ) in 18 comparisons (average of 5.8%) and significantly decreased ( $P \leq 0.05$ ) in 4 comparisons (average of 10.8%) compared to control pigs (Table S1). The greatest proportion of the comparisons found no evidence of difference ( $P > 0.10$ ) in ADG (46 comparisons). Of these, ADG was numerically increased ( $P > 0.10$ ) in 31 comparisons (average of 3.4%) and numerically decreased in 15 comparisons (average of 3.4%) compared to control pigs. Feed efficiency significantly increased ( $P \leq 0.05$ ) in 13 comparisons (average of 6.4%) and significantly decreased ( $P \leq 0.05$ ) in 1 comparison (9.7%) compared to control pigs. The greatest proportion of the comparisons found no evidence of difference ( $P > 0.10$ ) in ADG (51 comparisons). Of these, G:F was numerically increased ( $P > 0.10$ ) in 40 comparisons (average of 3.8%) and numerically decreased in 9 comparisons (average of 3.1%)

compared to control pigs. By comparing different acid types, acid blends and benzoic acids improved ADG more than SCFAs, while acid blends and SCFA improved G:F more than benzoic acid. Compared to control pigs, those fed acidifiers had 4.1% (18 comparisons), 2.8% (10 comparisons), and 0.3% (39 comparisons) improvement in ADG when fed acid blends, benzoic acid, and SCFA, respectively. Feed efficiency was improved by 4.2% (18 comparisons), 2.1% (10 comparisons), and 2.9% (39 comparisons) in pigs fed acid blends, benzoic acid, and SCFA, respectively, compared to control pigs. There were not enough data to support whether different types of basal diets and inclusion levels affected the response to acidifiers for ADG and G:F in grow-finish pig diets. In summary, feeding acidifiers has the potential to improve growth performance.

**Table S1.** Studies on the effects of dietary acidifiers on growth performance.

| Author                       | Country     | Acids                                                      | Inclusion, %     | Sig.            | Difference, % |      |
|------------------------------|-------------|------------------------------------------------------------|------------------|-----------------|---------------|------|
|                              |             |                                                            |                  |                 | ADG           | G:F  |
| Thacker and Bowland (1980)   | Canada      | Propionic acid                                             | 3.0              | ns              | -2.7          | 6.3  |
|                              |             |                                                            | 6.0              | ADG             | -12.2         | 4.5  |
|                              |             |                                                            | 9.0              | ADG             | -14.9         | 10.8 |
| Thacker and Bowland (1981)   | Canada      | Propionic acid                                             | 3.5              | ns              | 1.3           | 7.1  |
|                              |             |                                                            | 7.0              | ns              | -3.8          | 5.9  |
|                              |             | Calcium propionate                                         | 3.5              | ns              | 4.8           | 6.6  |
|                              |             |                                                            | 7.0              | ns              | -8.3          | -6.8 |
| Thacker et al. (1981)        | Canada      | Propionic acid                                             | 5.0 <sup>4</sup> | ADG, G:F        | -8.1          | 8.8  |
|                              |             |                                                            | 5.0 <sup>4</sup> | ADG             | -7.9          | 6.1  |
| Giesting and Easter (1985)   | USA         | Fumaric acid                                               | 1.5              | ns <sup>2</sup> | 2.5           | -2.7 |
|                              |             |                                                            | 3.0              |                 | 7.6           | 0.0  |
| Thacker et al. (1992)        | Canada      | Propionic acid                                             | 2.5              | ns              | -1.2          | 4.1  |
| Baustad (1993), Exp. 1       | Norway      | Formic acid                                                | 0.6              | ADG, G:F        | 11.4          | 11.3 |
|                              |             |                                                            | 1.2              | ns              | 5.3           | 6.2  |
| Baustad (1993), Exp. 2       | Norway      | Formic acid                                                | 0.6              | ADG, G:F        | 7.0           | 7.0  |
| Baustad (1993), Exp. 3       | Norway      | Formic acid                                                | 0.6              | ns              | 3.8           | 3.6  |
| Krause et al. (1994)         | USA         | Fumaric acid                                               | 2.5              | ns              | 2.3           | 3.6  |
| Siljander-Rasi et al. (1998) | Finland     | Formic acid                                                | 0.8              | ns              | 1.4           | 1.0  |
| Partanen et al. (2002)       | Finland     | Formic acid                                                | 0.8              | G:F             | 4.7           | 4.9  |
|                              |             | Formic acid and sorbate                                    | 0.8              | ADG, G:F        | 8.6           | 9.9  |
| Canibe et al. (2005)         | Denmark     | Formic acid                                                | 1.8              | ns              | 9.0           | 5.4  |
| Jansons and Nudiens (2005)   | Latvia      | Formic acid, acetic acid, citric acid, and phosphoric acid | 0.6/0.4/0.3      | ADG             | 5.9           | n/a  |
| Bühler et al. (2006)         | Switzerland | Benzoic acid                                               | 1.0              | ns              | 4.0           | 1.7  |
| Campbell et al. (2006)       | Ireland     | Acid blend                                                 | 0.3              | ns              | -5.4          | -7.5 |
|                              |             | Fumaric acid                                               | 0.2              | ns              | -8.1          | -6.3 |
| Partanen et al. (2006)       | Finland     | Sorbate-coated formic acid                                 | 0.3              | ns              | 4.9           | 3.7  |
|                              |             |                                                            | 0.6              | ADG             | 6.4           | 3.7  |
|                              |             |                                                            | 1.2              | ADG, G:F        | 5.6           | 7.3  |
|                              |             | Formic acid and lactic acid                                | 0.3              | ADG, G:F        | 6.4           | 5.5  |
|                              |             |                                                            | 0.6              | G:F             | 4.6           | 4.6  |
|                              |             |                                                            | 1.2              | G:F             | 5.4           | 5.0  |
|                              |             |                                                            | 1.2/1.0          | ns              | -0.9          | 2.4  |
| Eisemann and Heugten (2007)  | USA         | Formic acid, ammonium formate                              | 1.0/0.8          | ns              | -0.1          | 5.2  |
|                              |             |                                                            | 0.8/0.6          | ns              | 0.9           | 3.9  |
|                              |             |                                                            | 1.0              | ns              | 2.9           | 3.4  |
|                              |             |                                                            | 0.8              | ns              | -1.0          | 2.5  |
|                              |             |                                                            |                  |                 |               |      |

|                             |             |                                                                                                |                          |                                     |       |      |
|-----------------------------|-------------|------------------------------------------------------------------------------------------------|--------------------------|-------------------------------------|-------|------|
|                             |             |                                                                                                | 0.6                      | ns                                  | -1.4  | 2.3  |
|                             |             | Formic acid                                                                                    | 1.0                      | ns                                  | 1.8   | 3.4  |
| Øverland et al. (2007)      | Norway      | Benzoic acid                                                                                   | 0.85                     | ns                                  | 2.3   | 3.9  |
|                             |             | Sorbic acid                                                                                    | 0.85                     | ns                                  | 2.4   | 4.4  |
|                             |             | Fat coated Ca-butyrate                                                                         | 1.2                      | ns                                  | 7.2   | 0.9  |
|                             |             | Inulin coated Ca-butyrate                                                                      | 1.5                      | ns                                  | -2.9  | 0.5  |
| Guy et al. (2008)           | UK          | Formic acid and propionic acid                                                                 | 0.7/0.6/0.5/0.0.3        | ns                                  | -1.5  | -0.9 |
|                             |             | Formic acid, fumaric acid, and propionic acid                                                  | 1.0/0.8/0.6/0.5/0.4      | ns                                  | -0.3  | -1.3 |
| Kijparkorn et al. (2009)    | Thailand    | Formic acid, lactic acid, citric acid, fumaric acid                                            | 0.4                      | G:F                                 | -12.5 | -9.7 |
| Thacker and Haq (2009)      | Canada      | Propionic acid and acetic acid                                                                 | 1.0                      | ns                                  | 4.8   | -0.7 |
| Jansons et al. (2011)       | Latvia      | Formic acid, acetic acid, citric acid, and phosphoric acid                                     | 0.6/0.4/0.3 <sup>4</sup> | ADG                                 | 6.2   | n/a  |
|                             |             |                                                                                                | 0.6/0.4/0.3 <sup>4</sup> | ns                                  | -1.3  | n/a  |
| Upadhaya et al. (2014)      | South Korea | Fumaric acid, citric acid, malic acid, MCFA (capric and caprylic acid)                         | 0.1                      | ADG <sup>2</sup>                    | 3.9   | 2.8  |
|                             |             |                                                                                                | 0.2                      |                                     | 6.0   | 3.7  |
| Cho et al. (2015)           | South Korea | Benzoic acid                                                                                   | 0.5                      | ns                                  | 0.1   | -1.1 |
| Giannenas et al. (2016)     | Greece      | Benzoic acid                                                                                   | 0.5                      | ns                                  | 2.9   | 7.1  |
| Zhai et al. (2017)          | China       | Benzoic acid                                                                                   | 0.3                      | ADG <sup>2</sup> , G:F <sup>2</sup> | 5.9   | 3.1  |
|                             |             |                                                                                                | 0.5                      |                                     | 5.2   | 3.1  |
| Lei et al. (2018)           | South Korea | Fumaric acid, citric acid, malic acid, MCFA (capric and caprylic acid)                         | 0.05                     | ns                                  | 3.1   | 4.7  |
|                             |             |                                                                                                | 0.1                      | ns                                  | 5.4   | 6.3  |
| Nguyen Thi (2018)           | Vietnam     | Fumaric acid, lactic acid, calcium formate, and phosphoric acid                                | 0.2                      | ADG                                 | 5.6   | 4.3  |
| Morel et al. (2019)         | New Zealand | Benzoic acid                                                                                   | 0.5                      | ns                                  | 0.5   | 0.7  |
|                             |             | Butyrate                                                                                       | 0.15                     | ns                                  | 2.4   | 0.3  |
| Nguyen et al. (2019)        | South Korea | Fumaric acid, citric acid, malic acid, MCFA (capric and caprylic acid)                         | 0.1                      | ADG                                 | 4.1   | 4.5  |
|                             |             |                                                                                                | 0.2                      | ADG, G:F                            | 4.5   | 5.0  |
| O' Meara et al. (2020)      | Ireland     | Benzoic acid                                                                                   | 0.25                     | ns <sup>2</sup>                     | 2.9   | -0.9 |
|                             |             |                                                                                                | 0.5                      |                                     | 1.1   | 1.8  |
| Tran Thi Bich et al. (2020) | Thailand    | Formic acid, acetic acid, lactic acid, propionic acid, citric acid, and sorbic acid) and MCFAs | 0.2                      | ADG, G:F                            | 5.3   | 8.1  |

|                          |             |                                                            |          |                  |     |     |
|--------------------------|-------------|------------------------------------------------------------|----------|------------------|-----|-----|
| Muniyappan et al. (2021) | South Korea | Fumaric acid, citric acid, phosphoric acid, and malic acid | 0.05     | ADG <sup>2</sup> | 2.5 | 1.4 |
|                          |             |                                                            | 0.1      |                  | 3.3 | 1.8 |
| Tutida et al. (2021)     | Brazil      | Lactic, citric, and ascorbic acid                          | 0.1/0.05 | ns               | 0.0 | 0.0 |

<sup>1</sup>Significant level at  $P \leq 0.05$ . Difference is calculated as [(treatment value – control value) / control value] \* 100%.

<sup>2</sup>Polynomial contrasts were used for statistical analysis.

<sup>3</sup>Significant level at  $0.05 < P \leq 0.10$ .

<sup>4</sup>For experiments using factorial treatment structures, if the interaction of factors of either interested variable was observed the effect of the feed additive within each level of the other factor is included within the database.

### 1.1.2. Carcass Characteristics - Acidifiers

Back-fat significantly decreased ( $P \leq 0.05$ ) in 3 comparisons (average of 12%) compared to control pigs. The greatest proportion of the comparisons found no evidence of difference ( $P > 0.10$ ) in BF (21 comparisons; Table S2). Of these, BF was numerically increased ( $P > 0.10$ ) in 14 comparisons (average of 2.6%) and numerically decreased in 5 comparisons (average of 3.2%) compared to control pigs. For percentage lean, all comparisons found no evidence of difference ( $P > 0.10$ ) in percentage lean. Of these, percentage lean was numerically increased ( $P > 0.10$ ) in 9 comparisons (average of 0.9%) and numerically decreased in 15 comparisons (average of 1.4%) compared to control pigs. Loin muscle area/depth significantly increased ( $P \leq 0.05$ ) in 2 comparisons (average of 6.3%) compared to control pigs. The greatest proportion of the comparisons found no evidence of difference ( $P > 0.10$ ) in LAM/LD (9 comparisons). Of these, LMA/LD was numerically increased ( $P > 0.10$ ) in 7 comparisons (average of 2.6%) and numerically decreased in 2 comparisons (average of 6.9%) compared to control pigs. These results could be expected because the mechanisms do not directly affect the protein and lipid metabolism. Also, it appears that acidifiers' impacts on ADG and G:F were not great enough to affect carcass characteristics.

**Table S2.** Studies on the effects of dietary acidifiers on carcass characteristics.

| Author                     | Country     | Acidifiers                                                             | Inclusion,<br>% | Sig.             | Difference, % |       |                 |        |
|----------------------------|-------------|------------------------------------------------------------------------|-----------------|------------------|---------------|-------|-----------------|--------|
|                            |             |                                                                        |                 |                  | Yield         | BF    | percentage lean | LMA/LD |
| Thacker and Bowland (1980) | Canada      | Propionic acid                                                         | 3.0             | ns               | 0.1           | -2.4  | n/a             | n/a    |
|                            |             |                                                                        | 6.0             | BF               | 2.2           | -5.9  | n/a             | n/a    |
|                            |             |                                                                        | 9.0             | BF               | -3.5          | -15.3 | n/a             | n/a    |
| Thacker and Bowland (1981) | Canada      | Propionic acid                                                         | 3.5             | ns               | -0.4          | 0.9   | n/a             | n/a    |
|                            |             |                                                                        | 7.0             | ns               | -0.6          | -2.6  | n/a             | n/a    |
|                            |             | Calcium propionate                                                     | 3.5             | ns               | -0.6          | -6.6  | n/a             | n/a    |
|                            |             |                                                                        | 7.0             | BF               | -2.7          | -14.8 | n/a             | n/a    |
| Thacker et al. (1992)      | Canada      | Propionic acid                                                         | 2.5             | ns               | -0.6          | n/a   | -0.6            | n/a    |
| Baustad (1993), Exp. 1     | Norway      | Formic acid                                                            | 0.6             | ns               | n/a           | n/a   | -0.5            | n/a    |
|                            |             |                                                                        | 1.2             | ns               | n/a           | n/a   | -1.6            | n/a    |
| Baustad (1993), Exp. 2     | Norway      | Formic acid                                                            | 0.6             | ns               | n/a           | n/a   | 4.2             | n/a    |
| Baustad (1993), Exp. 3     | Norway      | Formic acid                                                            | 0.6             | ns               | n/a           | n/a   | 0.8             | n/a    |
| Partanen et al. (2002)     | Finland     | Formic acid                                                            | 0.8             | ns               | 0.5           | 1.3   | 0.2             | n/a    |
|                            |             | Formic acid and sorbate                                                | 0.8             | ns               | 0.0           | 1.3   | 0.3             | n/a    |
| Campbell et al. (2006)     | Ireland     | Acid blend                                                             | 0.3             | ns               | -0.3          | n/a   | n/a             | n/a    |
|                            |             | Fumaric acid                                                           | 0.2             | ns               | 0.5           | n/a   | n/a             | n/a    |
| Partanen et al. (2006)     | Finland     | Sorbate-coated formic acid                                             | 0.3             | ns               | -0.1          | 6.2   | -1.0            | n/a    |
|                            |             |                                                                        | 0.6             | ns               | -0.8          | 0.0   | -0.2            | n/a    |
|                            |             |                                                                        | 1.2             | ns               | 0.1           | 1.6   | -0.3            | n/a    |
|                            |             | Formic acid and lactic acid                                            | 0.3             | ns               | -0.4          | 1.6   | -0.3            | n/a    |
|                            |             |                                                                        | 0.6             | ns               | 0.0           | 2.3   | -0.3            | n/a    |
|                            |             |                                                                        | 1.2             | ns               | 0.5           | 0.8   | 0.5             | n/a    |
| Øverland et al. (2007)     | Norway      | Formic acid                                                            | 1.0             | ns               | 0.4           | n/a   | -2.7            | n/a    |
|                            |             | Benzoic acid                                                           | 0.85            | Yield            | 2.3           | n/a   | -1.8            | n/a    |
|                            |             | Sorbic acid                                                            | 0.85            | ns               | -0.3          | n/a   | -2.8            | n/a    |
|                            |             | Fat coated Ca-butyrate                                                 | 1.2             | ns               | -0.1          | n/a   | -2.9            | n/a    |
|                            |             | Inulin coated Ca-butyrate                                              | 1.5             | ns               | -0.4          | n/a   | -3.6            | n/a    |
| Thacker and Haq (2009)     | Canada      | Propionic and acetic acid                                              | 1.0             | ns               | 0.0           | 14.4  | -1.7            | 4.1    |
| Upadhaya et al. (2014)     | South Korea | Fumaric acid, citric acid, malic acid, MCFA (capric and caprylic acid) | 0.1             | LMA <sup>2</sup> | n/a           | n/a   | n/a             | 4.6    |
|                            |             |                                                                        | 0.2             |                  | n/a           | n/a   | n/a             | 8.1    |
| Nguyen Thi (2018)          | Vietnam     | Fumaric acid, lactic acid, calcium formate, and phosphoric acid        | 0.2             | ns               | -0.8          | 0.5   | n/a             | 2.5    |
| Morel et al. (2019)        |             | Benzoic acid                                                           | 0.5             | ns               | 0.1           | 0.0   | n/a             | 1.4    |

|                          |             |                                                                        |      |                 |      |      |      |      |
|--------------------------|-------------|------------------------------------------------------------------------|------|-----------------|------|------|------|------|
|                          | New Zealand | Butyrate                                                               | 0.15 | ns              | -0.4 | 1.1  | n/a  | 3.4  |
| Nguyen et al. (2019)     | South Korea | Fumaric acid, citric acid, malic acid, MCFA (capric and caprylic acid) | 0.1  | ns              | n/a  | n/a  | n/a  | -7.2 |
|                          |             |                                                                        | 0.2  | ns              | n/a  | n/a  | n/a  | -6.5 |
| O' Meara et al. (2020)   | Ireland     | Benzoic acid                                                           | 0.25 | ns <sup>2</sup> | -0.1 | 3.6  | -0.5 | 1.3  |
|                          |             |                                                                        | 0.5  |                 | -0.5 | -0.7 | 0.5  | 2.6  |
|                          |             |                                                                        | 1.0  |                 | -0.9 | -3.6 | 1.1  | 3.0  |
| Muniyappan et al. (2021) | South Korea | Fumaric acid, citric acid, phosphoric acid, and malic acid             | 0.05 | ns <sup>2</sup> | n/a  | 1.2  | 0.5  | n/a  |
|                          |             |                                                                        | 0.1  |                 | n/a  | 2.2  | 0.1  | n/a  |

<sup>1</sup>Significant level at  $P \leq 0.05$ . Difference is calculated as [(treatment value – control value) / control value] \* 100%.

<sup>2</sup>Polynomial contrasts were used for statistical analysis.

## 1.2. Essential Oils (EO)

There were 13 research articles for EO with 20 comparisons from 6 countries during the grow-finish or finishing period with added dietary levels of 0.003 to 0.1%. Of these, 20 comparisons reported growth performance data and 17 comparisons reported carcass data. Essential oils used in these experiments were extracted from caraway, citrus, cinnamon, Chinese cinnamon, oregano, clove, clover, rosemary, fenugreek seed, eucalyptus, lemon, garlic, and *Eucommia ulmoides*. Because of the similar antibacterial properties between essential oils and acids, these two additives are sometimes blended as a single additive. Therefore, 5 more articles (5 experiments) from 4 countries with blended additives (EO and acids) were also included.

### 1.2.1. Growth Performance - Essential Oils

Average daily gain significantly increased ( $P \leq 0.05$ ) in 10 comparisons (average of 9.9%) compared to control pigs (Table S3). Half of the studies found no evidence of difference ( $P > 0.10$ ) in ADG (10 comparisons). Of these, ADG was numerically increased ( $P > 0.10$ ) in 6 comparisons (average of 3.8%) and numerically decreased ( $P > 0.10$ ) in 3 comparisons (average of 1.7%) compared to control pigs. Feed efficiency significantly increased ( $P \leq 0.05$ ) in 7 comparisons (average of 10.9%) and tended to increase ( $0.05 < P \leq 0.10$ ) in 1 comparison (4.5%) compared to control pigs. Half of the studies found no evidence of difference ( $P > 0.10$ ) in G:F (9 comparisons). Of these, G:F was numerically increased ( $P > 0.10$ ) in 6 comparisons (average

of 3.5%) and numerically decreased ( $P > 0.10$ ) in 2 comparisons (average of 1.5%) compared to control pigs. Overall, the results suggest that EO had positive effects on ADG and G:F (80 and 82% of all the comparisons). Moreover, the beneficial effects of EO were significant ( $P < 0.10$ ) for ADG and G:F in 50 and 57% of all the comparisons, respectively. For EO and acid blends, there are only 7 comparisons for both ADG (average of 1.9% improvement) and G:F (average of 2.2% improvement). Of these, 71% of the comparison where pigs fed the additive had increased ADG (average of 3.8%) and G:F (average of 3.7%), and 29% of the comparisons had reduced ADG (average of 2.9%) and G:F (average of 1.5%) compared to control. There were insufficient data to support whether different types of basal diets and inclusion levels affected EO response for ADG and G:F. In summary, adding EO alone or in combination with acids has the potential to improve growth performance. However, there was only a small amount of research on EO's effect on growth performance, and only three studies were conducted in the US; therefore, the use of EO may not be beneficial in US-based conditions. More experiments are needed to determine the effect of including EO in the diets of grow-finish pigs.

**Table S3.** Studies on the effects of dietary essential oils (EO) with or without acids on growth performance.

| Author                              | Country     | Additive                                                                                         | Inclusion,<br>%        | Sig. <sup>1</sup>                   | Difference, % <sup>1</sup> |      |
|-------------------------------------|-------------|--------------------------------------------------------------------------------------------------|------------------------|-------------------------------------|----------------------------|------|
|                                     |             |                                                                                                  |                        |                                     | ADG                        | G:F  |
| Essential oils                      |             |                                                                                                  |                        |                                     |                            |      |
| Onibala et al. (2001)               | Indonesia   | Oregano EO                                                                                       | 0.0025                 | ADG, G:F                            | 4.1                        | 5.8  |
|                                     |             | Thyme EO                                                                                         | 0.0025                 | ADG, G:F                            | 8.8                        | 6.5  |
|                                     |             | Garlic EO                                                                                        | 0.0025                 | ADG, G:F                            | 5.9                        | 7.7  |
| Yan et al. (2010)                   | South Korea | Thyme, rosemary, and oregano EO                                                                  | 0.01                   | ADG                                 | 6.6                        | 6.6  |
| Simitzis et al. (2010)              | Greece      | Oregano EO                                                                                       | 0.025                  | ns                                  | 11.1                       | n/a  |
|                                     |             |                                                                                                  | 0.05                   | ns                                  | 2.6                        | n/a  |
|                                     |             |                                                                                                  | 0.1                    | ns                                  | 3.7                        | n/a  |
| Zhou et al. (2016)                  | China       | <i>Eucommia ulmoides</i> olive leaf polyphenolic extract                                         | 0.08                   | ADG, G:F                            | 18.8                       | 19.9 |
| Zou et al. (2016)                   | China       | <i>Oregano</i> EO                                                                                | 0.0025                 | ADG, G:F                            | 18.6                       | 15.7 |
| Li et al. (2017)                    | South Korea | Cinnamon, oregano, clove, thyme, and rosemary EO                                                 | 0.05                   | ns                                  | 3.8                        | 4.1  |
|                                     |             |                                                                                                  | 0.05                   | ns                                  | 1.0                        | 2.0  |
| Soto et al. (2017)                  | USA         | Caraway, garlic, thyme, and cinnamon                                                             | 0.020                  | ns                                  | -0.5                       | 1.3  |
|                                     |             | Oregano, citrus, and anise                                                                       | 0.013                  | ns                                  | 0.5                        | 1.0  |
|                                     |             | Caraway, garlic, thyme, cinnamon, oregano, citrus, and anise                                     | 0.033                  | ns                                  | 0.0                        | -0.3 |
| Zou et al. (2017)                   | China       | Oregano EO                                                                                       | 0.0025                 | ADG, G:F                            | 10.2                       | 9.4  |
| Cheng et al. (2018)                 | China       | Oregano EO                                                                                       | 0.025                  | ADG, G:F                            | 10.6                       | 11.0 |
| Lan and Kim (2018)                  | South Korea | Fenugreek seed, clover, and Chinese cinnamon EO                                                  | 0.01                   | ADG                                 | 5.0                        | 5.9  |
| Lowell et al. (2018)                | USA         | Oregano EO                                                                                       | 0.025                  | ns                                  | -2.9                       | 0.0  |
| Huang et al. (2021)                 | China       | Eucalyptus, oregano, thyme, lemon, garlic EO                                                     | 0.02                   | ADG, G:F <sup>3</sup>               | 10.3                       | 4.5  |
| Tutida et al. (2021)                | Brazil      | Thymol and Carvacrol                                                                             | 0.100                  | ns                                  | -1.6                       | -2.6 |
| Essential oils and Acidifier Blends |             |                                                                                                  |                        |                                     |                            |      |
| Cho et al. (2014)                   | South Korea | Citric acids, sorbic acid, and EOs (thymol and vanillin)                                         | 0.025                  | ADG <sup>2</sup>                    | 4.3                        | 3.0  |
|                                     |             |                                                                                                  | 0.05                   |                                     | 4.0                        | 3.0  |
| Walia et al. (2017)                 | Ireland     | Formic acid, citric acid, and EOs (citrus fruit extract, cinnamon, oregano, thyme, and capsicum) | 0.4                    | ns                                  | -4.6                       | -2.5 |
| Oh et al. (2019)                    |             |                                                                                                  | 0.1/0.025 <sup>5</sup> | ADG <sup>2</sup> , G:F <sup>2</sup> | 2.2                        | 2.7  |

|                        |             |                                                             |                       |     |      |      |
|------------------------|-------------|-------------------------------------------------------------|-----------------------|-----|------|------|
|                        | South Korea | Citric acids, sorbic acid, and EOs (thymol and vanillin)    | 0.2/0.05 <sup>5</sup> |     | 5.4  | 5.9  |
| Resende et al. (2020)  | Brazil      | Benzoic acid and EOs (thymol, 2-methoxyphenol, and eugenol) | 0.3                   | ADG | 3.3  | 3.8  |
| Hutchens et al. (2021) | USA         | Citric acids, sorbic acid, and EOs (thymol and vanillin)    | 0.3/0.1/0.054         | ns  | -1.2 | -0.5 |

<sup>1</sup>Significant level at  $P \leq 0.05$ . Difference is calculated as [(treatment value – control value) / control value] \* 100%.

<sup>2</sup>Polynomial contrasts were used for statistical analysis.

<sup>3</sup>Significant level at  $0.05 < P \leq 0.10$ .

<sup>4</sup>Feed additive was added at 0.3, 0.1% in nursery phase 1 and 2, respectively, and 0.05% in grow-finish phase.

<sup>5</sup>For the low inclusion treatment, feed additive was added at 0.1% in nursery phase and 0.025% in grow-finish phase. For the high inclusion treatment, feed additive was added at 0.2% in nursery phase and 0.05% in grow-finish phase.

### 1.2.2. Carcass Characteristics - Essential Oils

Back-fat significantly decreased ( $P \leq 0.05$ ) in 3 comparisons (average of 2.7%) compared to control pigs (Table S4). The greatest proportion of the comparisons found no evidence of difference ( $P > 0.10$ ) in BF (11 comparisons). Of these, BF was numerically increased ( $P > 0.10$ ) in 5 comparisons (average of 3.7%) and numerically decreased ( $P > 0.10$ ) in 6 comparisons (average of 5.5%) compared to control pigs. Percentage lean significantly increased ( $P \leq 0.05$ ) in 3 comparisons (average of 2.5%) compared to control pigs. The greatest proportion of the comparisons found no evidence of difference ( $P > 0.10$ ) in percentage lean (6 comparisons). Of these, percentage lean was numerically increased ( $P > 0.10$ ) in 3 comparisons (average of 1.2%) and numerically decreased ( $P > 0.10$ ) in 2 comparisons (average of 1.5%) compared to control pigs. Loin muscle area/depth significantly increased ( $P \leq 0.05$ ) in 3 comparisons (average of 7.1%) compared to control pigs. The greatest proportion of the comparisons found no evidence of difference ( $P > 0.10$ ) in LMA/LD (7 comparisons). Of these, LMA/LD was numerically increased ( $P > 0.10$ ) in 4 comparisons (average of 1.0%) and numerically decreased ( $P > 0.10$ ) in 3 comparisons (average of 2.3%) compared to control pigs. For essential oils and acid blends, there are only 3 experiments, and the effects on carcass characteristics were small and not statistically significant [BF (average of 0.5% improvement); percentage lean (average of 1.7% improvement); and LMA (average of 0.1% improvement)]. These results suggest that adding EO alone had some positive effects on carcass characteristics, which may be due to the

improvement in growth performance. However, there was only a small amount of research on

EO's effect on carcass characteristics, and only two research were conducted in the US.

Therefore, more experiments are needed to determine the effect of including EO in the diets of grow-finish pigs.

**Table S4.** Studies on the effects of dietary essential oils (EO) with or without acids on carcass characteristics.

| Table 31. Studies on the effects of dietary essential oils (EO) with or without acids on carcass characteristics. |             |                                                              |                 |                                  |                            |       |                        |        |
|-------------------------------------------------------------------------------------------------------------------|-------------|--------------------------------------------------------------|-----------------|----------------------------------|----------------------------|-------|------------------------|--------|
| Author                                                                                                            | Country     | Additive                                                     | Inclusion,<br>% | Sig. <sup>1</sup>                | Difference, % <sup>1</sup> |       |                        |        |
|                                                                                                                   |             |                                                              |                 |                                  | Yield                      | BF    | percent<br>age<br>lean | LMA/LD |
| Essential oils                                                                                                    |             |                                                              |                 |                                  |                            |       |                        |        |
| Onibala et al.<br>(2001)                                                                                          | Indonesia   | Oregano EO                                                   | 0.0025          | Yield, BF,<br>percentage<br>lean | 3.5                        | -7.5  | 2.4                    | n/a    |
|                                                                                                                   |             | Thyme EO                                                     | 0.0025          | Yield, BF,<br>percentage<br>lean | 3.8                        | -7.8  | 2.6                    | n/a    |
|                                                                                                                   |             | Garlic EO                                                    | 0.0025          | Yield, BF,<br>percentage<br>lean | 3.3                        | -7.7  | 2.5                    | n/a    |
| Simitzis et al.<br>(2010)                                                                                         | Greece      | Oregano EO                                                   | 0.025           | ns                               | -0.6                       | 4.1   | n/a                    | n/a    |
|                                                                                                                   |             |                                                              | 0.05            | ns                               | 0.1                        | -3.2  | n/a                    | n/a    |
|                                                                                                                   |             |                                                              | 0.1             | ns                               | 0.5                        | 1.8   | n/a                    | n/a    |
| Yan et al. (2010)                                                                                                 | South Korea | Thyme, rosemary, and oregano EO                              | 0.01            | LMA                              | n/a                        | n/a   | n/a                    | 12.3   |
| Zhou et al. (2016)                                                                                                | China       | Eucommia ulmoides oliver leaf polyphenolic extract           | 0.08            | ns                               | 0.8                        | -9.9  | -2.5                   | -6.3   |
| Zou et al. (2016)                                                                                                 | China       | Oregano EO                                                   | 0.0025          | Yield                            | 8.2                        | -0.5  | n/a                    | n/a    |
| Li et al. (2017)                                                                                                  | South Korea | Cinnamon, oregano, clove, thyme, and rosemary EO             | 0.05            | LMA                              | n/a                        | n/a   | n/a                    | 5.4    |
|                                                                                                                   |             |                                                              | 0.05            | LMA                              | n/a                        | n/a   | n/a                    | 3.7    |
| Soto et al. (2017)                                                                                                | USA         | Caraway, garlic, thyme, and cinnamon                         | 0.020           | ns                               | 0.3                        | 6.3   | -0.4                   | 0.8    |
|                                                                                                                   |             | Oregano, citrus, and anise                                   | 0.013           | ns                               | 0.0                        | 3.1   | 0.0                    | 1.2    |
|                                                                                                                   |             | Caraway, garlic, thyme, cinnamon, oregano, citrus, and anise | 0.033           | ns                               | 0.1                        | 3.1   | 0.2                    | 2.0    |
| Cheng et al. (2018)                                                                                               | China       | Oregano EO                                                   | 0.025           | ns                               | -0.8                       | -14.2 | 2.8                    | 0.0    |
| Lowell et al. (2018)                                                                                              | USA         | Oregano EO                                                   | 0.025           | Yield                            | -0.8                       | -3.9  | 0.7                    | -0.1   |
| Huang et al. (2021)                                                                                               | China       | Eucalyptus, oregano, thyme, lemon, garlic EO                 | 0.02            | ns                               | 0.3                        | -1.4  | n/a                    | -0.6   |
| Essential oils and Acidifier Blends                                                                               |             |                                                              |                 |                                  |                            |       |                        |        |
| Cho et al. (2014)                                                                                                 |             |                                                              | 0.025           | ns <sup>2</sup>                  | n/a                        | n/a   | n/a                    | -2.7   |

|                     |             |                                                                                                  |                                                 |                                               |            |            |            |            |
|---------------------|-------------|--------------------------------------------------------------------------------------------------|-------------------------------------------------|-----------------------------------------------|------------|------------|------------|------------|
|                     | South Korea | Citric acids, sorbic acid, and EOs (thymol and vanillin)                                         | 0.05                                            |                                               | n/a        | n/a        | n/a        | -2.4       |
| Walia et al. (2017) | Ireland     | Formic acid, citric acid, and EOs (citrus fruit extract, cinnamon, oregano, thyme, and capsicum) | 0.4                                             | Yield, BF <sup>3</sup> , percentage lean, LMA | -1.1       | -7.0       | 2.0        | 4.0        |
| Oh et al. (2019)    | South Korea | Citric acids, sorbic acid, and EOs (thymol and vanillin)                                         | 0.1/0.025 <sup>4</sup><br>0.2/0.05 <sup>4</sup> | percentage lean <sup>2,3</sup>                | n/a<br>n/a | 4.2<br>4.2 | 0.5<br>2.6 | 0.1<br>1.5 |

<sup>1</sup>Significant level at  $P \leq 0.05$ . Difference is calculated as [(treatment value – control value) / control value] \* 100%.

<sup>2</sup>Polynomial contrasts were used for statistical analysis.

<sup>3</sup>Significant level at  $0.05 \leq P < 0.10$ .

<sup>4</sup>For the low inclusion treatment, feed additive was added at 0.1% in nursery phase and 0.025% in grow-finish phase. For the high inclusion treatment, feed additive was added at 0.2% in nursery phase and 0.05% in grow-finish phase.

### 1.3. Direct-Fed Microbials (DFM)

There were 48 research articles for DFM with 79 comparisons from 14 countries during the grow-finish or finishing period which met the requirements for inclusion. Of these, 73 comparisons reported growth performance data, and 33 comparisons reported carcass data. Most strains of DFM used in the studies were *Bacillus spp.*, *Lactobacillus spp.*, and *Enterococcus faecium*. A DFM additive could contain a single or several strains of microbials. In addition, comparisons were also included when yeast (*Saccharomyces cerevisiae*) was added with other microbials as a blended DFM product. The effect of the single addition of yeast in diets was discussed in the yeast section.

#### 1.3.1. Growth Performance - DFM

Average daily gain significantly increased ( $P \leq 0.05$ ) in 25 comparisons (average of 6.3%), tended to increase ( $0.05 < P \leq 0.10$ ) in 2 comparisons (average of 3.9%), and significantly decreased ( $P \leq 0.05$ ) in 1 comparison (5.8%) compared to control pigs (Table S5). The greatest proportion of the comparisons found no evidence of difference ( $P > 0.10$ ) in ADG (43 comparisons). Of these, ADG was numerically increased ( $P > 0.10$ ) in 30 comparisons (average of 3.6%) and numerically decreased ( $P > 0.10$ ) in 13 comparisons (average of 2.3%) compared to control pigs. in pigs fed DFM. Feed efficiency significantly increased ( $P \leq 0.05$ ) in 18 comparisons (average of 6.1%) and tended to increase ( $0.05 < P \leq 0.10$ ) in 3 comparisons (average of 3%) compared to control pigs. The greatest proportion of the comparisons found

no evidence of difference ( $P > 0.10$ ) in G:F (45 comparisons). Of these, G:F was numerically increased ( $P > 0.10$ ) in 32 comparisons (average of 3.9%) and numerically decreased ( $P > 0.10$ ) in 11 comparisons (average of 2.2%) compared to control pigs. Overall, the results suggest that DFM positively affected ADG and G:F (80% of all the comparisons). Moreover, DFM showed positive statistical improvement ( $P < 0.10$ ) in 38 and 32% of all the comparisons for ADG and G:F, respectively. Similarly, Zimmermann et al. [50] conducted a meta-analysis and found probiotics significantly improved ADG and G:F of weaned piglets and finishing pigs. There were insufficient data to support whether different types of basal diets affected the response to DFM for ADG and G:F in grow-finish pigs. The effect of strain and inclusion level of DFM cannot be discussed because most studies used a blend of several microbials with varying concentrations. In summary, DFM has the potential to improve growth performance (3.3% improvement for ADG and G:F) of grow-finish pigs. However, there were relatively fewer US-based studies for DFM; therefore, the effects of DFM in US-based conditions may not be the same as what we discussed in this section.

**Table S5.** Studies on the effects of DFM on growth performance.

| Author                             | Country     | DFM <sup>4</sup>                                                                                                                                           | Inclusion, %                          | Sig. <sup>1</sup> | Difference, % <sup>1</sup> |      |
|------------------------------------|-------------|------------------------------------------------------------------------------------------------------------------------------------------------------------|---------------------------------------|-------------------|----------------------------|------|
|                                    |             |                                                                                                                                                            |                                       |                   | ADG                        | G:F  |
| Pollmann et al. (1980)             | USA         | <i>L. acidophilus</i>                                                                                                                                      | 0.05                                  | ns                | -1.2                       | -0.9 |
|                                    |             | <i>Streptococcus faeciurn</i>                                                                                                                              | 0.05                                  | ns                | -1.2                       | -0.9 |
| Harper et al. (1983)               | USA         | <i>L. acidophilus</i>                                                                                                                                      | 0.1/0.05                              | ADG               | -5.8                       | -3.0 |
|                                    |             |                                                                                                                                                            | 0.05                                  | ns                | 1.3                        | -1.4 |
| Kim et al. (1998)                  | USA         | <i>L. acidophilus</i>                                                                                                                                      | 0.05                                  | ns                | 2.2                        | -0.4 |
|                                    |             |                                                                                                                                                            | 1.0/0.5/0.2×10 <sup>9</sup> spores/kg | ADG               | 4.5                        | n/a  |
| Kyriakis et al. (2003)             | Greece      | <i>B. toyoi</i>                                                                                                                                            | 1.0/0.5/0.2×10 <sup>9</sup> spores/kg | ADG               | 8.3                        | n/a  |
|                                    |             |                                                                                                                                                            | 0.04/0.02                             | ADG, G:F          | 2.2                        | 4.5  |
| Alexopoulos et al. (2004)          | Greece      | <i>B. licheniformis</i> and <i>B. subtilis</i>                                                                                                             | 0.04/0.04                             | ADG, G:F          | 3.6                        | 5.7  |
|                                    |             |                                                                                                                                                            | 0.04/0.06                             | ADG, G:F          | 3.6                        | 5.3  |
| Rekiel et al. (2005)               | Poland      | <i>Pediococcus acidilactici</i>                                                                                                                            | 0.01                                  | ns                | -1.9                       | -1.9 |
| Jukna et al. (2005)                | Lithuania   | <i>Saccharomyces cerevisiae</i> , <i>L. casei</i> , <i>L. acidophilus</i> , <i>Streptococcus faecium</i> , <i>B. subtilis</i>                              | 0.20                                  | ns                | 20.3                       | n/a  |
| Shon et al. (2005)                 | South Korea | <i>L. reuteri</i> and <i>L. salivarius</i> complex                                                                                                         | 0.2                                   | ns                | 3.2                        | 1.4  |
| Chen et al. (2006)                 | South Korea | <i>B. subtilis</i> , <i>B. coagulans</i> , and <i>L. acidophilus</i>                                                                                       | 0.1                                   | ns                | 5.3                        | 3.7  |
|                                    |             |                                                                                                                                                            | 0.2                                   | ADG               | 11.4                       | 5.1  |
| Chen et al. (2006)                 | South Korea | <i>Enterococcus faecium</i> SF68                                                                                                                           | 0.1                                   | ns <sup>2</sup>   | 4.9                        | 2.0  |
|                                    |             |                                                                                                                                                            | 0.2                                   |                   | 4.1                        | 4.0  |
| Davis et al. (2008)                | USA         | <i>B. licheniformis</i> and <i>B. subtilis</i>                                                                                                             | 0.05                                  | G:F               | 0.6                        | 3.0  |
| Ko et al. (2008)                   | South Korea | <i>L. acidophilus</i> , <i>L. plantarum</i> , <i>B. subtilis</i> , <i>B. coagulans</i> , and <i>Saccharomyces cerevisiae</i>                               | 0.5                                   | ns                | 4.6                        | 7.7  |
|                                    |             |                                                                                                                                                            | 0.1                                   | ns                | 7.5                        | 0.9  |
| Ko and Yang (2008)                 | South Korea | <i>L. acidophilus</i> , <i>L. plantarum</i> , <i>B. subtilis</i> , <i>B. coagulans</i> , and <i>Saccharomyces cerevisiae</i>                               | 0.5                                   | ns                | 6.5                        | 2.9  |
|                                    |             |                                                                                                                                                            | 1.0                                   | ns                | 4.3                        | -1.4 |
| Černauskienė et al. (2010), Exp. 1 | Lithuania   | <i>Enterococcus faecium</i>                                                                                                                                | 10 <sup>10</sup> cfu/kg               | ADG               | 3.1                        | -0.6 |
| Černauskienė et al. (2010), Exp. 2 | Lithuania   | <i>Enterococcus faecium</i>                                                                                                                                | 10 <sup>10</sup> cfu/kg               | ns                | 1.5                        | 3.0  |
| Meng et al. (2010)                 | South Korea | <i>B. subtilis</i> endospores and <i>Clostridium butyricum</i>                                                                                             | 0.2                                   | ADG, G:F          | 7.5                        | 7.9  |
|                                    |             | <i>B. subtilis</i>                                                                                                                                         | 0.3                                   | ns                | 1.3                        | 1.8  |
| Giang et al. (2011)                | Vietnam     | <i>B. subtilis</i> and <i>Saccharomyces boulardi</i>                                                                                                       | 0.3                                   | ns                | 2.6                        | 2.9  |
|                                    |             | <i>B.</i> , <i>Saccharomyces boulardi</i> , <i>Enterococcus faecium</i> , <i>L. acidophilus</i> , <i>Pediococcus pentosaceus</i> , and <i>L. fermentum</i> | 0.3                                   | ADG               | 5.2                        | 5.3  |

|                               |             |                                                                                                                                                                                                            |                                                             |                                          |                     |                     |
|-------------------------------|-------------|------------------------------------------------------------------------------------------------------------------------------------------------------------------------------------------------------------|-------------------------------------------------------------|------------------------------------------|---------------------|---------------------|
| Nitikanchana et al. (2011)    | USA         | <i>B. species</i>                                                                                                                                                                                          | $0.2 \times 10^9$ cfu/g<br>$2 \times 10^9$ cfu/g            | ns <sup>2</sup>                          | -2.3<br>-1.4        | 0.8<br>0.4          |
| Hossain et al. (2012)         | South Korea | <i>L. acidophilus</i> , <i>L. plantarum</i> , <i>B. subtilis</i> , <i>B. coagulans</i> , and <i>Saccharomyces cerevisiae</i>                                                                               | 0.5                                                         | ADG                                      | 7.9                 | 6.0                 |
| Cui et al. (2013)             | China       | <i>B. subtilis</i>                                                                                                                                                                                         | 2.0                                                         | ADG, G:F                                 | 3.6                 | 2.4                 |
| Kerr et al. (2013)            | USA         | <i>Pediococcus acidilactici</i><br><i>B. licheniformis</i> and <i>B. subtilis</i>                                                                                                                          | 0.011<br>0.05                                               | ns<br>ns                                 | 0.8<br>-1.1         | -1.5<br>-5.4        |
| Liu et al. (2013)             | China       | Yeasts, lactic acid-producing bacteria, and <i>B. subtilis</i>                                                                                                                                             | 1.0                                                         | ns                                       | 3.2                 | 2.9                 |
| Balasubramanian et al. (2016) | South Korea | <i>B. coagulans</i> , <i>B. licheniformis</i> , <i>B. subtilis</i> , and <i>Clostridium butyricum</i>                                                                                                      | 0.01<br>0.02                                                | ADG <sup>2</sup> ,<br>G:F <sup>2</sup>   | 2.7<br>3.2          | 4.9<br>5.2          |
| Dowarah et al. (2016)         | India       | <i>L. acidophilus</i> NCDC-15<br><i>Pediococcus acidilactici</i> FT28                                                                                                                                      | 0.02<br>0.02                                                | ADG, G:F<br>ADG, G:F                     | 11.7<br>14.9        | 9.4<br>9.8          |
| Giannenas et al. (2016)       | Greece      | <i>Enterococcus faecium</i>                                                                                                                                                                                | 0.0035                                                      | ns                                       | 3.0                 | 6.8                 |
| Jørgensen et al. (2016)       | Denmark     | <i>B. licheniformis</i> and <i>B. subtilis</i>                                                                                                                                                             | 0.04                                                        | ADG, G:F                                 | 3.3                 | 1.9                 |
| Sarker et al. (2016)          | South Korea | <i>L. acidophilus</i> , <i>L. plantarum</i> , <i>B. subtilis</i> , <i>B. coagulans</i> , and <i>Saccharomyces cerevisiae</i>                                                                               | 0.2<br>0.4<br>0.8                                           | ns<br>ns<br>ns                           | -6.2<br>-0.5<br>2.1 | -7.2<br>3.9<br>13.1 |
| Nguyen et al. (2017)          | South Korea | <i>Enterococcus faecium</i>                                                                                                                                                                                | 0.01                                                        | ADG, G:F                                 | 3.9                 | 3.1                 |
| Tufarelli et al. (2017)       | Italy       | <i>Streptococcus thermophilus</i> , <i>Bifidobacterium animalis</i> ssp. <i>Lactis</i> , <i>L. acidophilus</i> , <i>L. helveticus</i> , <i>L. paracasei</i> , <i>L. plantarum</i> , and <i>L. brevis</i> . | 100 mg/kg<br>BW                                             | ADG <sup>3</sup>                         | 3.0                 | n/a                 |
| Balasubramanian et al. (2018) | South Korea | <i>B. coagulans</i> , <i>B. licheniformis</i> , <i>B. subtilis</i> , and <i>Clostridium butyricum</i>                                                                                                      | 0.01<br>0.02                                                | ADG, G:F<br>ADG, G:F                     | 6.0<br>7.4          | 8.4<br>9.3          |
| Bučko et al. (2018)           | Slovak      | <i>L. plantarum</i>                                                                                                                                                                                        | 3g/day                                                      | ns                                       | -1.2                | 0.4                 |
| Nguyen Thi (2018)             | Vietnam     | <i>B. subtilis</i> , <i>L. spp.</i> , <i>Saccharomyces cerevisiae</i>                                                                                                                                      | 0.2                                                         | ADG                                      | 4.7                 | 3.3                 |
| Samolińska et al. (2018)      | Poland      | <i>L. lactis</i> , <i>Carnobacterium divergens</i> , <i>L. casei</i> , <i>L. plantarum</i> , and <i>Saccharomyces cerevisiae</i>                                                                           | 0.05 <sup>5</sup><br>0.05 <sup>5</sup><br>0.05 <sup>5</sup> | ns<br>ns<br>ns                           | 2.2<br>3.1<br>2.5   | 2.2<br>3.5<br>3.0   |
| Shi et al. (2018)             | China       | <i>B. subtilis</i> and <i>Devosia</i> sp.                                                                                                                                                                  | 0.2<br>0.2                                                  | ns<br>ADG                                | -3.2<br>15.3        | 10.9<br>5.1         |
| Lan and Kim (2019)            | South Korea | <i>B. licheniformis</i> and <i>B. subtilis</i>                                                                                                                                                             | 0.02<br>0.04<br>0.08                                        | ns <sup>2</sup>                          | 1.8<br>2.0<br>5.4   | 0.0<br>0.9<br>1.2   |
| Wang and Kim (2019)           | South Korea | <i>B. subtilis</i> and <i>P. farinosa</i>                                                                                                                                                                  | 0.1<br>0.2                                                  | ADG <sup>2</sup> ,<br>G:F <sup>2,3</sup> | 1.7<br>3.8          | 2.0<br>4.0          |
| Peet-Schwering et al. (2020)  | Netherlands | <i>B. amyloliquefaciens</i> and <i>B. subtilis</i>                                                                                                                                                         | 0.04                                                        | G:F                                      | 1.4                 | 0.5                 |

|                            |             |                                                                                                                                                                |                           |                           |      |      |
|----------------------------|-------------|----------------------------------------------------------------------------------------------------------------------------------------------------------------|---------------------------|---------------------------|------|------|
| Reszka et al. (2020)       | Poland      | EM Carbon Bokash                                                                                                                                               | 0.5/0.3                   | ns                        | 1.4  | 0.8  |
| Rybarczyk et al. (2020)    | Poland      | <i>Saccharomyces cerevisiae</i> , <i>L. casei</i> , and <i>L. plantarum</i>                                                                                    | 0.30                      | ns                        | -5.9 | n/a  |
|                            |             | <i>L. sp.</i> , <i>B. sp.</i> , and <i>Saccharomyces cerevisiae</i>                                                                                            | 0.50                      | ns                        | -2.4 | n/a  |
|                            |             | <i>L. sp.</i> , <i>B. sp.</i> , <i>Saccharomyces cerevisiae</i> , and <i>Paenibacillus polymyxa</i>                                                            | 0.1                       | ns                        | n/a  | 9.0  |
| Frimpong et al. (2021)     | Ghana       | <i>L. sp.</i> , <i>B. sp.</i> , <i>Saccharomyces cerevisiae</i> , and <i>Paenibacillus polymyxa</i>                                                            | 0.15                      | ns                        | n/a  | 4.1  |
| Grela et al. (2021)        | Poland      | <i>Lactococcus lactis</i> , <i>Carnobacterium divergens</i> S1, <i>L. casei</i> , <i>L. plantarum</i> , and <i>Sacharomyces cerevisiae</i>                     | 0.1                       | ADG,<br>G:F <sup>3</sup>  | 2.5  | 3.0  |
| Kwak et al. (2021)         | South Korea | <i>L. plantarum</i> , <i>L. fermentum</i> , <i>L. salivarius</i> , <i>Leuconostoc paramesenteroides</i> , and <i>B. subtilis</i> , and <i>B. licheniformis</i> | 0.2                       | ADG <sup>3</sup> ,<br>G:F | 4.8  | 8.6  |
| Pomorska-Mól et al. (2021) | Poland      | <i>Leuconostoc mesenteroides</i> , <i>L. casei</i> , <i>L. plantarum</i> , <i>Pediococcus pentosaceus</i> .                                                    | $4 \times 10^{12}$ cfu/kg | ns                        | 3.7  | n/a  |
| Rybarczyk et al. (2021)    | Poland      | <i>B. licheniformis</i> and <i>B. subtilis</i>                                                                                                                 | 0.04                      | ADG, G:F                  | 14.6 | 7.7  |
| Shen et al. (2021)         | China       | <i>B. subtilis</i>                                                                                                                                             | $5 \times 10^9$ cfu/kg    | ns                        | 0.8  | 6.7  |
|                            |             | biodegradable <i>B. subtilis</i>                                                                                                                               | $5 \times 10^9$ cfu/kg    | G:F                       | 3.6  | 13.0 |
| Tutida et al. (2021)       | Brazil      | <i>B. spp.</i> , <i>B. bifidum</i> , <i>E. faecium</i> , <i>L. acidophilus</i>                                                                                 | 0.05                      | ns                        | -1.4 | 0.0  |

<sup>1</sup>Significant level at  $P \leq 0.05$ . Difference is calculated as [(treatment value – control value) / control value] \* 100%.

<sup>2</sup>Polynomial contrasts were used for statistical analysis.

<sup>3</sup>Significant level at  $0.05 < P \leq 0.10$ .

<sup>4</sup>*Bacillus spp.* is abbreviated as *B.*, and *Lactobacillus spp.* is abbreviated as *L.*

<sup>5</sup>The basal diets in the middle and bottom comparison contained long-chain inulin and Jerusalem artichoke, respectively, while the top comparison did not.

### 1.3.2. Carcass Characteristics - DFM

Back-fat significantly increased ( $P \leq 0.05$ ) in 1 comparison (16.8%), significantly decreased ( $P \leq 0.05$ ) in 2 comparisons (average of 13.1%) and tended to decrease ( $0.05 < P \leq 0.10$ ) in 3 comparisons (average of 2.9%) compared to control pigs (Table S6). The greatest proportion of the comparisons found no evidence of difference ( $P > 0.10$ ) in BF (15 comparisons). Of these, BF was numerically increased ( $P > 0.10$ ) in 6 comparisons (average of 7.1%) and numerically decreased ( $P > 0.10$ ) in 9 comparisons (average of 6.3%) compared to control pigs. Percentage lean tended to increase ( $0.05 < P \leq 0.10$ ) in 1 comparison (1.8%) compared to control pigs. The greatest proportion of the comparisons found no evidence of difference ( $P > 0.10$ ) in percentage lean (12 comparisons). Of these, percentage lean was numerically increased ( $P > 0.10$ ) in 9 comparisons (average of 1.8%) and numerically decreased ( $P > 0.10$ ) in 3 comparisons (average of 1.8%) compared to control pigs. Loin muscle area/depth significantly increased ( $P \leq 0.05$ ) in 1 comparison (average of 10.9%) compared to control pigs. The greatest proportion of the comparisons found no evidence of difference ( $P > 0.10$ ) in LMA/LD (18 comparisons). Of these, LMA/LD was numerically increased ( $P > 0.10$ ) in 14 comparisons (average of 2%) and numerically decreased ( $P > 0.10$ ) in 3 comparisons (average of 3.4%) compared to control pigs. The small effects and lack of statistical differences of DFM on carcass characteristics may suggest that the mechanisms of DFM do not directly affect pigs' protein and lipid metabolism.

Even though DFM has beneficial effects on growth performance, the improvement in growth did not equally improve BF, percentage lean, and LMA/LD to the same extent.

**Table S6.** Studies on the effects of DFM on carcass characteristics.

| Author                             | Country     | DFM <sup>4</sup>                                                                                                              | Inclusion, %                | Sig. <sup>1</sup> | Difference, % <sup>1</sup> |       |                 |        |
|------------------------------------|-------------|-------------------------------------------------------------------------------------------------------------------------------|-----------------------------|-------------------|----------------------------|-------|-----------------|--------|
|                                    |             |                                                                                                                               |                             |                   | Yield                      | BF    | percentage lean | LMA/LD |
| Kim et al. (1998)                  | USA         | <i>L. acidophilus</i>                                                                                                         | 0.05                        | ns                | 0.8                        | -5.6  | 1.5             | n/a    |
| Jukna et al. (2005)                | Lithuania   | <i>Saccharomyces cerevisiae</i> , <i>L. casei</i> , <i>L. acidophilus</i> , <i>Streptococcus faecium</i> , <i>B. subtilis</i> | 0.20                        | ns                | 2.7                        | n/a   | n/a             | n/a    |
| Rekiel et al. (2005)               | Poland      | <i>Pediococcus acidilactici</i>                                                                                               | 0.01                        | ns                | 0.3                        | 0.4   | 2.4             | 2.2    |
| Cernauskienė et al. (2010), Exp. 1 | Lithuania   | <i>Enterococcus faecium</i>                                                                                                   | 10 <sup>10</sup> cfu/kg     | ns                | -0.3                       | n/a   | -2.0            | n/a    |
| Cernauskienė et al. (2010), Exp. 2 | Lithuania   | <i>Enterococcus faecium</i>                                                                                                   | 10 <sup>10</sup> cfu/kg     | ns                | 0.1                        | n/a   | n/a             | n/a    |
| Meng et al. (2010)                 | South Korea | <i>B. subtilis</i> endospores and <i>Clostridium butyricum</i>                                                                | 0.2                         | ns                | n/a                        | n/a   | n/a             | 4.3    |
| Nitikanchana et al. (2011)         | USA         | <i>B. species</i>                                                                                                             | 0.2 × 10 <sup>9</sup> cfu/g | BF <sup>2,3</sup> | 0.5                        | -4.2  | 0.7             | 0.0    |
|                                    |             |                                                                                                                               | 2 × 10 <sup>9</sup> cfu/g   |                   | 0.9                        | -1.4  | 0.5             | 1.1    |
| Hossain et al. (2012)              | South Korea | <i>L. acidophilus</i> , <i>L. plantarum</i> , <i>B. subtilis</i> , <i>B. coagulans</i> , and <i>Saccharomyces cerevisiae</i>  | 0.5                         | ns                | n/a                        | 20.3  | n/a             | n/a    |
| Cui et al. (2013)                  | China       | <i>B. subtilis</i>                                                                                                            | 2.0                         | BF, LMA           | 2.0                        | 16.8  | n/a             | 10.9   |
| Balasubramanian et al. (2016)      | South Korea | <i>B. coagulans</i> , <i>B. licheniformis</i> , <i>B. subtilis</i> , and <i>Clostridium butyricum</i>                         | 0.01                        | ns <sup>2</sup>   | n/a                        | 4.5   | 0.9             | 1.2    |
|                                    |             |                                                                                                                               | 0.02                        |                   | n/a                        | -5.1  | 1.5             | 2.4    |
| Sarker et al. (2016)               | South Korea | <i>L. acidophilus</i> , <i>L. plantarum</i> , <i>B. subtilis</i> , <i>B. coagulans</i> , and <i>Saccharomyces cerevisiae</i>  | 0.2                         | ns                | n/a                        | -10.9 | n/a             | n/a    |
|                                    |             |                                                                                                                               | 0.4                         | ns                | n/a                        | -4.2  | n/a             | n/a    |
|                                    |             |                                                                                                                               | 0.8                         | ns                | n/a                        | -9.1  | n/a             | n/a    |
| Nguyen et al. (2017)               | South Korea | <i>Enterococcus faecium</i>                                                                                                   | 0.01                        | ns                | n/a                        | n/a   | n/a             | 0.5    |
| Balasubramanian et al. (2018)      | South Korea | <i>B. coagulans</i> , <i>B. licheniformis</i> , <i>B. subtilis</i> , and <i>Clostridium butyricum</i>                         | 0.01                        | ns                | n/a                        | -2.2  | n/a             | 0.1    |
|                                    |             |                                                                                                                               | 0.02                        | BF                | n/a                        | -8.2  | n/a             | 2.8    |
| Bučko et al. (2018)                | Slovak      | <i>L. plantarum</i>                                                                                                           | 3g/day                      | BF                | n/a                        | -18.1 | 3.6             | 1.2    |
| Nguyen Thi (2018)                  | Vietnam     | <i>B. subtilis</i> , <i>L. spp.</i> , <i>Saccharomyces cerevisiae</i>                                                         | 0.2                         | ns                | -0.8                       | -1.0  | n/a             | 2.9    |
| Runjun et al. (2018)               | India       | <i>P. acidilactici</i>                                                                                                        | 2 × 10 <sup>9</sup> cfu/g   | ns                | 0.6                        | -10.7 | 3.1             | n/a    |
|                                    |             | <i>L. acidophilus</i>                                                                                                         | 2 × 10 <sup>9</sup> cfu/g   | ns                | -0.5                       | -7.9  | 2.1             | n/a    |
| Reszka et al. (2020)               | Poland      | EM Carbon Bokash                                                                                                              | 0.5/0.3                     | ns                | n/a                        | n/a   | n/a             | 5.0    |

|                         |        |                                                                                                                                                                          |                                |                                                       |      |      |      |      |
|-------------------------|--------|--------------------------------------------------------------------------------------------------------------------------------------------------------------------------|--------------------------------|-------------------------------------------------------|------|------|------|------|
|                         |        |                                                                                                                                                                          | 0.5/0.3                        | ns                                                    | n/a  | n/a  | n/a  | -1.5 |
|                         |        |                                                                                                                                                                          | 0.5/0.3                        | ns                                                    | n/a  | n/a  | n/a  | 0.6  |
| Rybarczyk et al. (2020) | Poland | <i>Saccharomyces cerevisiae</i> , <i>L. casei</i> ,<br>and <i>L. plantarum</i>                                                                                           | 0.30                           | ns                                                    | n/a  | 8.1  | -2.0 | -5.8 |
|                         |        |                                                                                                                                                                          | 0.50                           | ns                                                    | n/a  | 6.3  | -1.3 | -2.9 |
| Grela et al. (2021)     | Poland | <i>Lactococcus lactis</i> , <i>Carnobacterium</i><br><i>divergens</i> S1, <i>L. casei</i> , <i>L.</i><br><i>plantarum</i> , and <i>Sacharomyces</i><br><i>cerevisiae</i> | 0.1                            | BF <sup>3</sup> ,<br>percenta<br>ge lean <sup>3</sup> | -0.5 | -3.0 | 1.8  | 1.9  |
| Rybarczyk et al. (2021) | Poland | <i>B. licheniformis</i> and <i>B. subtilis</i>                                                                                                                           | 0.04                           | ns                                                    | 0.9  | n/a  | n/a  | n/a  |
| Tian et al. (2021)      | China  | <i>L. reuteri</i>                                                                                                                                                        | 5 × 10 <sup>10</sup><br>cfu/kg | ns                                                    | 2.2  | 3.1  | n/a  | 1.9  |

<sup>1</sup>Significant level at  $P \leq 0.05$ . Difference is calculated as [(treatment value – control value) / control value] \* 100%.

<sup>2</sup>Polynomial contrasts were used for statistical analysis.

<sup>3</sup>Significant level at  $0.05 < P \leq 0.10$ .

<sup>4</sup>*Bacillus spp.* is abbreviated as *B.*, and *Lactobacillus spp.* is abbreviated as *L.*

#### *1.4. Yeasts – Yeast Culture and Yeast-Derived Ingredients*

There were 22 research articles for yeasts with 36 comparisons from 12 countries during the grow-finish or finishing period which met the requirements for inclusion. Of these, 36 comparisons reported growth performance data, and 24 comparisons reported carcass data. Yeast was included in the diets as yeast culture, hydrolysate yeast culture, or mannan oligosaccharide (**MOS**). Yeast products were derived from *Saccharomyces cerevisiae* (yeast) and *Phaffia rhodozyma* (red yeast) yeast strains. Because of the lack of studies for individual yeast products, the effects of yeast culture and yeast-derived ingredients were combined and discussed for growth performance and carcass characteristics.

##### *1.4.1. Growth Performance - Yeasts*

Average daily gain significantly increased ( $P \leq 0.05$ ) in 9 comparisons (average of 5.6%) compared to control pigs (Table S7). The greatest proportion of the comparisons found no evidence of difference ( $P > 0.10$ ) in ADG (27 comparisons). Of these, ADG was numerically increased ( $P > 0.10$ ) in 16 comparisons (average of 3.2%) and numerically decreased ( $P > 0.10$ ) in 11 comparisons (average of 4.1%) compared to control pigs. Feed efficiency significantly increased ( $P \leq 0.05$ ) in 10 comparisons (average of 7.8%) compared to control pigs. The greatest proportion of the comparisons found no evidence of difference ( $P > 0.10$ ) in G:F (23 comparisons). Of these, G:F was numerically increased ( $P > 0.10$ ) in 12 comparisons (average of 3.9%) and numerically decreased ( $P > 0.10$ ) in 10 comparisons (average of 3.6%) compared to

control pigs. There were not enough data to support whether different basal diets affected the response of yeasts on ADG and G:F. Moreover, there were insufficient comparisons or information to determine the effect of different concentrations of active yeast ingredients on ADG and G:F. Overall, the results suggest that yeasts positively affected ADG and G:F (69 and 67% of all the comparisons, respectively), with 25 and 30% of all the comparisons being significant ( $P \leq 0.05$ ). In summary, yeasts can be a potential feed additive with relatively large magnitude on improving the growth performance of grow-finish pigs, especially for G:F.

**Table S7.** Studies on the effects of yeasts and yeast-derived ingredients on growth performance.

| Author                                 | Country     | Yeast form <sup>6</sup>    | Inclusion, %                             | Sig. <sup>1</sup>                      | Difference, % <sup>1</sup> |       |
|----------------------------------------|-------------|----------------------------|------------------------------------------|----------------------------------------|----------------------------|-------|
|                                        |             |                            |                                          |                                        | ADG                        | G:F   |
| Barber et al. (1971)                   | UK          | Yeast culture              | (7.1 and 3.1)/(3.6 and 1.6) <sup>4</sup> | ADG                                    | 2.9                        | n/a   |
| Bowman and Veum (1973)                 | USA         | Yeast culture              | 2.00 <sup>5</sup>                        | ns                                     | -5.3                       | 0.0   |
|                                        |             |                            | 2.00 <sup>5</sup>                        | ns                                     | 2.9                        | 3.3   |
| Burnett and Neil (1977), Exp. 1        | UK          | Yeast culture              | 0.05                                     | ns                                     | -0.6                       | -0.9  |
| Burnett and Neil (1977), Exp. 2        | UK          | Yeast culture              | 0.05                                     | ns                                     | 0.6                        | 0.0   |
| Bae et al. (1999)                      | South Korea | MOS                        | 0.10                                     | ns                                     | 1.3                        | 4.7   |
| Davis et al. (2002)                    | USA         | MOS                        | 0.2                                      | ns                                     | 1.2                        | -1.3  |
| Campbell et al. (2006)                 | Ireland     | MOS                        | 0.15                                     | ns                                     | -5.4                       | -7.0  |
| Reynoso-González et al. (2010), Exp. 1 | Mexico      | Yeast culture              | 0.75                                     | ns                                     | -7.0                       | -2.6  |
|                                        |             |                            | 1.5                                      | ns                                     | -3.5                       | -3.2  |
| Reynoso-González et al. (2010), Exp. 2 | Mexico      | Yeast culture              | 0.75 <sup>5</sup>                        | ns                                     | 4.8                        | 4.9   |
|                                        |             |                            | 0.75 <sup>5</sup>                        | ns                                     | -2.2                       | -6.1  |
| Ha et al. (2012)                       | South Korea | Yeast culture              | 2.0                                      | ns                                     | -1.4                       | n/a   |
| Kerr et al. (2013)                     | USA         | Yeast culture              | 0.1                                      | ns                                     | -13.7                      | -11.7 |
| Wenner et al. (2013)                   | USA         | MOS                        | 0.2/0.1/0.055                            | ns                                     | 0.8                        | 1.6   |
| Edwards et al. (2014)                  | Australia   | MOS                        | 0.04/0.025                               | ns                                     | 3.6                        | 3.9   |
| Lei and Kim (2014)                     | South Korea | Yeast culture <sup>6</sup> | 0.1                                      | G:F <sup>2</sup>                       | 3.6                        | 4.6   |
|                                        |             |                            | 0.2                                      |                                        | 2.4                        | 5.2   |
| Giannenas et al. (2016)                | Greece      | MOS                        | 0.1                                      | ns                                     | 3.4                        | 9.1   |
| Szakacs et al. (2016)                  | Romania     | Yeast extract              | 0.03                                     | ns                                     | 4.9                        | 10.4  |
|                                        |             |                            | 0.03                                     | ns                                     | 1.6                        | -2.5  |
| Gong et al. (2018)                     | China       | Yeast culture              | 0.3                                      | ADG                                    | 8.4                        | 5.2   |
|                                        |             |                            | 0.05                                     |                                        | 2.6                        | 3.8   |
| Zhang et al. (2019)                    | South Korea | Hydrolysate yeast culture  | 0.10                                     | ADG <sup>2</sup> ,<br>G:F <sup>2</sup> | 3.7                        | 0.8   |
|                                        |             |                            | 0.50                                     |                                        | 3.9                        | 4.8   |
|                                        |             |                            | 1.00                                     | G:F                                    | 7.0                        | 5.0   |
|                                        |             |                            | 2.00                                     |                                        | 6.0                        | 13.2  |
| Bo et al. (2020)                       | Vietnam     | Yeast extract              | 4.00                                     | G:F                                    | 9.7                        | 17.7  |
|                                        |             |                            | 6.00                                     | G:F                                    | 10.3                       | 16.8  |
|                                        |             |                            | 0.2                                      | ADG                                    | 5.4                        | 2.0   |
| Dávila-Ramírez et al. (2020)           | Mexico      | Yeast culture              | 0.3                                      | ADG                                    | 6.1                        | -0.5  |

|                       |          |               |           |     |      |      |
|-----------------------|----------|---------------|-----------|-----|------|------|
| He et al. (2021)      | China    | Yeast culture | 2.0       | ns  | -1.6 | 1.5  |
| Mayorga et al. (2021) | USA      | Yeast culture | 0.025     | ns  | 3.3  | n/a  |
| Namted et al. (2021)  | Thailand | Hydrolysate   | 0.5       | G:F | -1.6 | 6.6  |
|                       |          | yeast culture | 1.0       | ns  | -2.3 | 0.4  |
| Tutida et al. (2021)  | Brazil   | MOS           | 0.04/0.02 | ns  | 0.8  | -0.4 |

<sup>1</sup>Significant level at  $P \leq 0.05$ . Difference is calculated as [(treatment value – control value) / control value] \* 100%.

<sup>2</sup>Polynomial contrasts were used for statistical analysis.

<sup>3</sup>Significant level at  $0.05 < P \leq 0.10$ .

<sup>4</sup>Inclusion levels of sequential phases.

<sup>5</sup>For experiments using factorial treatment structures, if the interaction of factors of either interested variable was observed the effect of the feed additive within each level of the other factor is included within the database.

<sup>6</sup>Yeast culture and yeast-derived ingredients (MOS) were produced from strains of *Saccharomyces cerevisiae*, except the yeast culture used in Lei and Kim (2014). Yeast culture used in Lei and Kim (2014) was derived from *Phaffia rhodozyma*.

#### 1.4.2. Carcass Characteristics - Yeasts

All 21 comparisons found no evidence of difference ( $P > 0.10$ ) in BF. Of these, BF was numerically increased ( $P > 0.10$ ) in 12 comparisons (average of 4.1%) and numerically decreased ( $P > 0.10$ ) in 8 comparisons (average of 14.4%) compared to control pigs (Table S8). Percentage lean tended to increase ( $0.05 < P \leq 0.10$ ) in 3 comparisons (average of 0.8%) and tended to decrease ( $0.05 < P \leq 0.10$ ) in 1 comparison (1.2%) compared to control pigs. Half of the studies found no evidence of difference ( $P > 0.10$ ) in percentage lean (4 comparisons). Of these, percentage lean was numerically increased ( $P > 0.10$ ) in 2 comparisons (average of 4.9%) and numerically decreased ( $P > 0.10$ ) in 2 comparisons (average of 1.3%) compared to control pigs.. All the comparisons found no evidence of difference ( $P > 0.10$ ) in LMA/LD. Of these, LMA/LD was numerically increased ( $P > 0.10$ ) in 10 comparisons (average of 3.6%) and numerically decreased ( $P > 0.10$ ) in 7 comparisons (average of 1.9%) compared to control pigs.

**Table S8.** Studies on the effects of yeasts and yeast-derived ingredients on carcass characteristics.

| Author                                 | Country     | Yeast form <sup>6</sup>    | Inclusion, %                             | Sig. <sup>1</sup>              | Difference, % <sup>1</sup> |       |                  |         |
|----------------------------------------|-------------|----------------------------|------------------------------------------|--------------------------------|----------------------------|-------|------------------|---------|
|                                        |             |                            |                                          |                                | Yield                      | BF    | percent age lean | LMA/L D |
| Barber et al. (1971)                   | UK          | Yeast culture              | (7.1 and 3.1)/(3.6 and 1.6) <sup>4</sup> | ns                             | -0.9                       | 0.5   | n/a              | -0.6    |
| Bowman and Veum (1973)                 | USA         | Yeast culture              | 2.00 <sup>5</sup>                        | ns                             | n/a                        | 7.1   | -0.9             | -3.2    |
|                                        |             |                            | 2.00 <sup>5</sup>                        | ns                             | n/a                        | -2.8  | -1.7             | 0.7     |
| Burnett and Neil (1977), Exp. 2        | UK          | Yeast culture              | 0.05                                     | ns                             | 0.9                        | 2.5   | n/a              | n/a     |
| Campbell et al. (2006)                 | Ireland     | MOS                        | 0.15                                     | ns                             | -0.6                       | n/a   | n/a              | n/a     |
| Reynoso-González et al. (2010), Exp. 1 | Mexico      | Yeast culture              | 0.75                                     | ns                             | -2.3                       | -12.4 | n/a              | -2.4    |
|                                        |             |                            | 1.5                                      | ns                             | 0.0                        | -19.4 | n/a              | 6.9     |
| Reynoso-González et al. (2010), Exp. 2 | Mexico      | Yeast culture              | 0.75 <sup>5</sup>                        | ns                             | 1.1                        | -10.6 | n/a              | 0.9     |
|                                        |             |                            | 0.75 <sup>5</sup>                        | ns                             | -0.8                       | 8.0   | n/a              | -0.3    |
| Ha et al. (2012)                       | South Korea | Yeast culture              | 2.0                                      | ns                             | n/a                        | 0.0   | n/a              | n/a     |
| Wenner et al. (2013)                   | USA         | MOS                        | 0.2/0.1/0.055                            | ns                             | n/a                        | -2.6  | n/a              | 1.4     |
| Edwards et al. (2014)                  | Australia   | MOS                        | 0.04/0.025                               | Yield                          | 2.2                        | 2.7   | n/a              | n/a     |
| Lei and Kim (2014)                     | South Korea | Yeast culture <sup>6</sup> | 0.1                                      | ns <sup>2</sup>                | n/a                        | n/a   | n/a              | 2.5     |
|                                        |             |                            | 0.2                                      |                                | n/a                        | n/a   | n/a              | 0.8     |
| Zhang et al. (2019)                    | South Korea | Hydrolysate yeast culture  | 0.05                                     | percentage lean <sup>2,3</sup> | n/a                        | 0.8   | -1.2             | n/a     |
|                                        |             |                            | 0.1                                      |                                | n/a                        | 3.3   | 0.6              | n/a     |
|                                        |             |                            | 0.5                                      |                                | n/a                        | 3.5   | 1.4              | n/a     |
|                                        |             |                            | 1.0                                      |                                | n/a                        | 4.5   | 0.4              | n/a     |
|                                        |             |                            | 2.00                                     |                                | n/a                        | 0.0   | n/a              | 1.6     |
| Bo et al. (2020)                       | Vietnam     | Yeast extract              | 4.00                                     | ns                             | n/a                        | 1.3   | n/a              | 0.5     |
|                                        |             |                            | 6.00                                     | ns                             | n/a                        | 4.0   | n/a              | -0.3    |
|                                        |             |                            | 0.2                                      | ns                             | 0.0                        | -24.6 | n/a              | 4.7     |
| Dávila-Ramírez et al. (2020)           | Mexico      | Yeast culture              | 0.3                                      | ns                             | 0.5                        | 11.2  | n/a              | 16.6    |
|                                        |             |                            | 0.5                                      | ns                             | -0.8                       | -30.7 | 6.6              | -1.9    |
| Namted et al. (2021)                   | Thailand    | Hydrolysate yeast culture  | 1.0                                      | ns                             | -0.4                       | -12.2 | 3.2              | -4.3    |

---

<sup>1</sup>Significant level at  $P \leq 0.05$ . Difference is calculated as [(treatment value – control value) / control value] \* 100%.

<sup>2</sup>Polynomial contrasts were used for statistical analysis.

<sup>3</sup>Significant level at  $0.05 < P \leq 0.10$ .

<sup>4</sup>Inclusion levels of sequential phases.

<sup>5</sup>For experiments using factorial treatment structures, if the interaction of factors of either interested variable was observed the effect of the feed additive within each level of the other factor is included within the database.

<sup>6</sup>Yeast culture and yeast-derived ingredients (MOS) were produced from strains of *Saccharomyces cerevisiae*, except the yeast culture used in Lei and Kim (2014). Yeast culture used in Lei and Kim (2014) was derived from *Phaffia rhodozyma*.

### 1.5. Copper (Cu)

There were 55 research articles for Cu with 157 comparisons from 11 countries during the grow-finish or finishing period with added dietary levels of 50 to 300 mg/kg with most studies ranged between 120 to 250 mg/kg. Of these, 155 comparisons reported growth performance data and 83 comparisons reported carcass data. The Cu sources used in the studies were in inorganic [CuSO<sub>4</sub>, Cu<sub>2</sub>O, CuO, Tribasic Cu chloride (**TBCC**), CuS] or organic form (Cu-AAAs).

#### 1.5.1. Growth Performance - Cu

Average daily gain significantly increased ( $P \leq 0.05$ ) in 30 comparisons (average of 6.2%), tended to increase ( $0.05 < P \leq 0.10$ ) in 3 comparisons (average of 4.1%), and significantly decreased ( $P \leq 0.05$ ) in 1 comparison (0.1%) compared to control pig (Table S9). The greatest proportion of the comparisons found no evidence of difference ( $P > 0.10$ ) in ADG (121 comparisons). Of these, ADG was numerically increased ( $P > 0.10$ ) in 81 comparisons (average of 3.8%) and numerically decreased ( $P > 0.10$ ) in 33 comparisons (average of 3.4%) compared to control pigs. Feed efficiency significantly increased ( $P \leq 0.05$ ) in 30 comparisons (average of 5.1%), tended to increase ( $0.05 < P \leq 0.10$ ) in 3 comparisons (average of 1.0%), and significantly decreased ( $P \leq 0.05$ ) in 2 comparisons (average of 3.7%) compared to control pigs. The greatest proportion of the comparisons found no evidence of difference ( $P > 0.10$ ) in G:F (114 comparisons). Of these, G:F was numerically increased ( $P > 0.10$ ) in 71 comparisons (average of 3.1%) and numerically decreased ( $P > 0.10$ ) in 37 comparisons (average of 2.7%) compared to

control pigs. Overall, the results suggest that Cu positively affected ADG and G:F (74 and 70 % of all the comparisons). Most studies used corn or barley as the major ingredient in basal diets. Copper supplementation in the barley diet had a greater percentage improvement in ADG (2.8%; 60 comparisons) and G:F (3.1%; 59 comparisons) than Cu supplementation in corn-based diets [ADG (2.0%; 89 comparisons) and G:F (0.8%; 84 comparisons)]. Most studies used Cu inclusion from 125 to 250 mg/kg added level (137 comparisons) and increasing the Cu level did not further improve the performance. In summary, the growth-promoting effects of Cu can potentially improve growth performance (2.5 and 1.8% improvement for ADG and G:F).

**Table S9.** Studies on the effects of Cu on growth performance.

| Author                          | Country | Cu                | Inclusion, mg/kg | Sig.     | Difference, % |      |
|---------------------------------|---------|-------------------|------------------|----------|---------------|------|
|                                 |         |                   |                  |          | ADG           | G:F  |
| Lucas and Calder (1957), Exp. 1 | UK      | CuSO <sub>4</sub> | 200              | ns       | 3.9           | 0.7  |
| Lucas and Calder (1957), Exp. 2 | UK      | CuSO <sub>4</sub> | 200              | ns       | 6.5           | 7.1  |
| King (1960)                     | UK      | CuSO <sub>4</sub> | 0.10%            | G:F      | 2.9           | 6.1  |
|                                 |         |                   | 0.10%            | ADG, G:F | 7.7           | 11.0 |
| Wallace et al. (1960), Exp. 1   | USA     | CuSO <sub>4</sub> | 100              | ns       | 11.1          | -1.8 |
|                                 |         |                   | 150              | ns       | 5.2           | 0.9  |
|                                 |         |                   | 200              | ns       | 0.7           | 0.9  |
| Wallace et al. (1960), Exp. 2   | USA     | CuSO <sub>4</sub> | 200 <sup>4</sup> | ns       | -3.8          | -8.0 |
|                                 |         |                   | 200 <sup>4</sup> | ns       | 3.3           | 4.5  |
| Wallace et al. (1960), Exp. 3   | USA     | CuSO <sub>4</sub> | 100 <sup>4</sup> | ns       | 0.0           | 17.6 |
|                                 |         |                   | 100 <sup>4</sup> | ns       | -6.5          | 0.3  |
| Bellis (1961)                   | UK      | CuSO <sub>4</sub> | 125              | ns       | 3.9           | 3.3  |
|                                 |         |                   | 250              | ADG, G:F | 7.1           | 8.0  |
| Lucas et al. (1961), Exp. 1     | UK      | CuSO <sub>4</sub> | 62               | ns       | -1.1          | -1.4 |
|                                 |         |                   | 125              | ns       | 1.1           | 0.6  |
|                                 |         |                   | 250              | ns       | 4.5           | 0.6  |
| Lucas et al. (1961), Exp. 2     | UK      | CuSO <sub>4</sub> | 62               | ns       | 2.2           | 0.9  |
|                                 |         |                   | 125              | ns       | 2.2           | 1.8  |
|                                 |         |                   | 250              | ns       | 3.3           | 2.1  |
| Barber et al. (1962)            | UK      | CuSO <sub>4</sub> | 250 <sup>4</sup> | ADG, G:F | 14.5          | 5.5  |
|                                 |         |                   | 250 <sup>4</sup> | ADG      | 5.1           | 2.2  |
| Braude et al. (1962)            | UK      | CuSO <sub>4</sub> | 250 <sup>4</sup> | ADG, G:F | 9.7           | 8.6  |
|                                 |         |                   | 250 <sup>4</sup> | ADG, G:F | 6.2           | 5.2  |
| Lucas et al. (1962)             | UK      | CuSO <sub>4</sub> | 250              | ns       | 2.6           | -0.1 |
| Gipp et al. (1967)              | USA     | CuO               | 150 <sup>4</sup> | ns       | -4.7          | -2.3 |
|                                 |         |                   | 150 <sup>4</sup> | ns       | 0.4           | 4.2  |
| Barber et al. (1968), Exp. 1    | UK      | CuSO <sub>4</sub> | 250              | ADG, G:F | 11.1          | 9.0  |

|                                                    |              |                   |                  |                                     |       |      |
|----------------------------------------------------|--------------|-------------------|------------------|-------------------------------------|-------|------|
| Barber et al. (1968), Exp. 2                       | UK           | CuSO <sub>4</sub> | 250              | ns                                  | 7.1   | 3.9  |
| Barber et al. (1968), Exp. 3                       | UK           | CuSO <sub>4</sub> | 250              | G:F                                 | 5.3   | 4.4  |
| Hanrahan and O'Grady (1968)                        | Ireland      | CuSO <sub>4</sub> | 250              | ns                                  | -12.2 | -6.0 |
| Boyazoglu and Barrett (1970)                       | South Africa | CuSO <sub>4</sub> | 150              | ns                                  | n/a   | 4.4  |
|                                                    |              |                   | 300              | ns                                  | n/a   | -0.8 |
| Barber et al. (1971), Exp. 1                       | UK           | CuSO <sub>4</sub> | 250 <sup>4</sup> | G:F                                 | 4.5   | 5.3  |
|                                                    |              |                   | 250 <sup>4</sup> | G:F                                 | -1.4  | 4.1  |
| Barber et al. (1971), Exp. 2                       | UK           | CuSO <sub>4</sub> | 250 <sup>4</sup> | ADG, G:F                            | 8.1   | 6.1  |
|                                                    |              |                   | 250 <sup>4</sup> | ns                                  | -3.8  | -1.3 |
| Barber et al. (1971), Exp. 3                       | UK           | CuSO <sub>4</sub> | 250              | ADG, G:F                            | 7.4   | 5.6  |
| DeGoey et al. (1971)                               | USA          | CuSO <sub>4</sub> | 250              | ADG                                 | 15.2  | 1.9  |
|                                                    |              |                   | 150              |                                     | 7.2   | -2.4 |
| Kline et al. (1971)                                | USA          | CuSO <sub>4</sub> | 200              | ADG <sup>2</sup>                    | -0.1  | -7.8 |
|                                                    |              |                   | 250              |                                     | 8.4   | -0.5 |
| Kline et al. (1972)                                | USA          | CuSO <sub>4</sub> | 250 <sup>4</sup> | ns                                  | 14.8  | 5.4  |
|                                                    |              |                   | 250 <sup>4</sup> | ns                                  | -3.2  | 10.7 |
|                                                    |              |                   | 250 <sup>4</sup> | ns                                  | 5.5   | -6.7 |
| Braude and Ryder (1973)                            | UK           | CuSO <sub>4</sub> | 150              |                                     | 3.1   | 3.6  |
|                                                    |              |                   | 200              | ADG <sup>2</sup> , G:F <sup>2</sup> | 4.4   | 3.9  |
|                                                    |              |                   | 250              |                                     | 5.9   | 5.5  |
| Elliot and Amer (1973), Exp. 1                     | Canada       | CuSO <sub>4</sub> | 250              | ns                                  | -6.8  | n/a  |
|                                                    |              |                   | 125              | ns                                  | -4.3  | 10.0 |
|                                                    |              |                   | 150              | ns                                  | 0.0   | 0.3  |
| Elliot and Amer (1973), Exp. 2                     | Canada       | CuSO <sub>4</sub> | 175              | ns                                  | 1.8   | 1.9  |
|                                                    |              |                   | 200              | ns                                  | 1.8   | 10.0 |
|                                                    |              |                   | 225              | ns                                  | -3.7  | 1.9  |
|                                                    |              |                   | 250              | ns                                  | -10.2 | 1.3  |
| Gipp et al. (1973), Exp. 1                         | USA          | CuSO <sub>4</sub> | 250              | ns                                  | 4.1   | 3.3  |
| Gipp et al. (1973), Exp. 2                         | USA          | CuSO <sub>4</sub> | 250              | ns                                  | -1.3  | -3.3 |
| Gipp et al. (1973), Exp. 3                         | USA          | CuSO <sub>4</sub> | 250              | ns                                  | -4.0  | -0.7 |
| Kline et al. (1973), Exp. 1                        | USA          | CuSO <sub>4</sub> | 250              | ADG, G:F                            | 8.9   | 6.7  |
| Kline et al. (1973), Exp. 2                        | USA          | CuSO <sub>4</sub> | 250              | ns                                  | 0.4   | -2.9 |
| Kline et al. (1973), Exp. 3                        | USA          | CuSO <sub>4</sub> | 250              | ns                                  | -5.5  | 9.3  |
| NCR-42 Committee on Swine Nutrition (1974), Exp. 1 | USA          | CuSO <sub>4</sub> | 250              | ns                                  | 1.8   | 0.1  |
|                                                    |              |                   | 125.5            | ns                                  | 2.1   | 0.3  |
| NCR-42 Committee on Swine Nutrition (1974), Exp. 2 | USA          | CuSO <sub>4</sub> | 187.5            | ns                                  | 2.3   | -0.3 |
|                                                    |              |                   | 250              | ns                                  | 3.5   | 1.5  |
| Bellis (1975)                                      | UK           | CuSO <sub>4</sub> | 175 <sup>4</sup> | ns                                  | -1.5  | 0.0  |
|                                                    |              |                   | 175 <sup>4</sup> | ADG, G:F                            | 3.1   | 2.8  |
| Castell et al. (1975), Exp. 1                      | Canada       | CuSO <sub>4</sub> | 125 <sup>5</sup> | ns                                  | 4.8   | -1.5 |
|                                                    |              |                   | 200 <sup>5</sup> | ns                                  | 8.7   | 4.1  |
|                                                    |              |                   | 125 <sup>5</sup> | ns                                  | 4.3   | 4.2  |
|                                                    |              |                   | 200 <sup>5</sup> | ns                                  | 6.3   | 3.5  |
| Castell et al. (1975), Exp. 2                      | Canada       | CuSO <sub>4</sub> | 125 <sup>5</sup> | ns                                  | 2.0   | 2.2  |
|                                                    |              |                   | 200 <sup>5</sup> | ns                                  | 1.7   | 0.9  |
|                                                    |              |                   | 125 <sup>5</sup> | ns                                  | 2.8   | 5.5  |
| Castell et al. (1975), Exp. 3                      | Canada       | CuSO <sub>4</sub> | 200 <sup>5</sup> | ns                                  | 2.6   | 5.2  |
|                                                    |              |                   | 125              | ns                                  | -0.4  | -3.3 |
| Castell et al. (1975), Exp. 4                      | Canada       | CuSO <sub>4</sub> | 200              | ns                                  | 0.9   | -3.0 |
|                                                    |              |                   | 125              | ns                                  | 2.0   | 3.3  |
| Castell et al. (1975), Exp. 5                      | Canada       | CuSO <sub>4</sub> | 200              | ns                                  | -2.0  | 2.9  |
|                                                    |              |                   | 125              | ns                                  | 3.3   | 2.1  |
|                                                    |              |                   | 200              | G:F                                 | 3.1   | 4.3  |

|                                       |         |                   |                  |                  |      |      |
|---------------------------------------|---------|-------------------|------------------|------------------|------|------|
| Hansen and Bresson (1975)             | Denmark | CuSO <sub>4</sub> | 125              | ADG, G:F         | 4.9  | 5.2  |
|                                       |         |                   | 200              | ADG              | 3.9  | 3.2  |
| Omole et al. (1976)                   | Nigeria | CuSO <sub>4</sub> | 125              | ns               | 9.3  | 5.5  |
|                                       |         |                   | 200              | G:F              | 14.8 | 8.5  |
| Barber et al. (1978)                  | UK      | NA                | 250              | ADG, G:F         | 2.0  | 2.9  |
| Cromwell et al. (1978), Exp. 1        | USA     | CuSO <sub>4</sub> | 125              | ns               | 4.5  | 0.3  |
|                                       |         |                   | 188              | ns               | 2.8  | -2.2 |
|                                       |         |                   | 250              | ns               | 14.0 | 2.0  |
| Cromwell et al. (1978), Exp. 2        | USA     | CuSO <sub>4</sub> | 125              | G:F              | 0.4  | 2.3  |
|                                       |         |                   | 250              | G:F              | 1.3  | 3.5  |
| Cromwell et al. (1978), Exp. 3        | USA     | CuSO <sub>4</sub> | 250              | ns               | 2.8  | 2.5  |
|                                       |         | CuS               | 250              | ns               | -2.7 | 2.2  |
| Pond et al. (1978)                    | USA     | CuSO <sub>4</sub> | 200              | ns               | 0.0  | -3.2 |
| Eisemann et al. (1979)                | USA     | CuSO <sub>4</sub> | 120              | ns               | -6.6 | -2.0 |
| Prince et al. (1979), Exp. 1          | USA     | CuSO <sub>4</sub> | 250              | ns               | 1.8  | 1.5  |
| Prince et al. (1979), Exp. 2          | USA     | CuSO <sub>4</sub> | 250              | ns               | 5.3  | 5.4  |
| Barber et al. (1981), Exp. 1          | UK      | CuSO <sub>4</sub> | 250              | ADG, G:F         | 4.1  | 3.7  |
| Barber et al. (1981), Exp. 2          | UK      | CuSO <sub>4</sub> | 250              | ADG, G:F         | 2.6  | 2.5  |
| Ribeiro de Lima et al. (1981), Exp. 1 | USA     | CuSO <sub>4</sub> | 250 <sup>4</sup> | ns               | 10.0 | 1.7  |
|                                       |         |                   | 250 <sup>4</sup> | ns               | -4.6 | 0.0  |
|                                       |         |                   | 250 <sup>4</sup> | ns               | -3.7 | -1.4 |
| Ribeiro de Lima et al. (1981), Exp. 2 | USA     | CuSO <sub>4</sub> | 250              | ns               | 0.8  | -4.6 |
| Ribeiro de Lima et al. (1981), Exp. 3 | USA     | CuSO <sub>4</sub> | 250              | ns               | 0.0  | 1.5  |
| Braude and Hosking (1982)             | UK      | CuSO <sub>4</sub> | 125              | ADG, G:F         | 4.4  | 4.8  |
|                                       |         |                   | 200              | ADG, G:F         | 3.1  | 2.8  |
|                                       |         |                   | 200/125          | ADG, G:F         | 3.3  | 3.4  |
|                                       |         |                   | 250/125          | ADG, G:F         | 4.9  | 4.8  |
| Bradley et al. (1983)                 | USA     | CuSO <sub>4</sub> | 52.5             | ns               | 0.0  | n/a  |
|                                       |         |                   | 112.5            | ns               | -1.8 | n/a  |
|                                       |         |                   | 232.5            | ns               | -1.8 | n/a  |
| Prince et al. (1984), Exp. 1          | USA     | CuSO <sub>4</sub> | 250              | ns               | 0.1  | 1.4  |
| Prince et al. (1984), Exp. 2          | USA     | CuSO <sub>4</sub> | 250              | ADG <sup>3</sup> | 3.0  | 1.6  |
| Southern and Stewart (1984), Exp. 1   | USA     | CuSO <sub>4</sub> | 250              | ns               | 3.8  | n/a  |
| Southern and Stewart (1984), Exp. 2   | USA     | CuSO <sub>4</sub> | 250              | ns               | 0.0  | n/a  |
| Rowan and Lawrence (1986)             | UK      | NA                | 183              | ns               | -0.1 | -0.7 |
| Astrup and Matre (1987)               | Norway  | CuSO <sub>4</sub> | 63               | ns               | 1.1  | 6.3  |
|                                       |         |                   | 125              | ns               | 4.8  | 5.3  |
|                                       |         |                   | 250              | ns               | 3.5  | 4.6  |
| Lüdke and Schöne (1988), Exp.1        | Germany | CuSO <sub>4</sub> | 250              | ns               | 10.7 | 2.1  |
| Lüdke and Schöne (1988), Exp.2        | Germany | CuSO <sub>4</sub> | 250              | ns               | 5.7  | 2.5  |
| Schöne et al. (1988)                  | Germany | CuSO <sub>4</sub> | 250              | ns               | 14.2 | 5.2  |
| Ward et al. (1991)                    | USA     | CuSO <sub>4</sub> | 250              | ns               | 2.5  | -5.5 |
| Myer et al. (1992)                    | USA     | CuSO <sub>4</sub> | 250              | ns               | -1.1 | -1.1 |
| Southern et al. (1993)                | USA     | NA                | 250              | ns               | -1.1 | 0.0  |
| Apgar and Kornegay (1996)             | USA     | CuSO <sub>4</sub> | 200              | ns               | -2.8 | n/a  |

|                             |           |                          |                  |                                    |      |      |
|-----------------------------|-----------|--------------------------|------------------|------------------------------------|------|------|
|                             |           | Cu-Lys                   | 200              | ns                                 | 11.1 | n/a  |
| Lauridsen et al. (1999)     | Denmark   | CuSO <sub>4</sub>        | 175              | ns                                 | 0.3  | -5.0 |
| Davis et al. (2002)         | USA       | CuSO <sub>4</sub>        | 175/125          | ADG, G:F                           | 6.6  | 3.6  |
| Hernández et al. (2009)     | Australia | Cu-AA                    | 50 <sup>4</sup>  | G:F                                | -1.1 | -5.4 |
|                             |           |                          | 50 <sup>4</sup>  | ns                                 | -3.2 | 0.4  |
|                             |           |                          | 50               | G:F                                | 2.0  | -1.9 |
| Coble et al. (2014)         | USA       | CuSO <sub>4</sub>        | 125              | ns                                 | 1.5  | -1.9 |
|                             |           | Cu-AA                    | 50               | ns                                 | 2.0  | -0.4 |
|                             |           |                          | 125 <sup>4</sup> | ns                                 | 0.5  | 1.3  |
| Feldpausch et al. (2016)    | USA       | CuSO <sub>4</sub>        | 125 <sup>4</sup> | ns                                 | -0.5 | -1.3 |
|                             |           |                          | 75               |                                    | 3.9  | -2.2 |
| Coble et al. (2017)         | USA       | CuSO <sub>4</sub> /TBCC  | 150              | ADG <sup>2</sup>                   | 3.9  | -1.8 |
| Coble et al. (2018)         | USA       | TBCC                     | 150              | ns                                 | 1.7  | 0.3  |
|                             |           |                          | 150 <sup>4</sup> | ADG <sup>3</sup> , GF <sup>3</sup> | 0.0  | 0.3  |
| Coble et al. (2018), Exp. 1 | USA       | TBCC                     | 150 <sup>4</sup> | ADG <sup>3</sup> , GF <sup>3</sup> | 0.0  | 1.1  |
|                             |           |                          | 150 <sup>4</sup> | ADG <sup>3</sup> , GF <sup>3</sup> | 2.4  | 1.6  |
|                             |           |                          | 150 <sup>6</sup> | ns                                 | 0.0  | 0.3  |
|                             |           |                          | 150 <sup>6</sup> | ns                                 | 1.1  | 0.0  |
| Coble et al. (2018), Exp. 2 | USA       | TBCC                     | 150 <sup>6</sup> | ns                                 | 2.2  | 1.8  |
|                             |           |                          | 150 <sup>6</sup> | ns                                 | 1.1  | 0.6  |
|                             |           |                          | 70               |                                    | 1.7  | 0.8  |
| Carpenter et al. (2019)     | USA       | CuSO <sub>4</sub> /Cu-AA | 100              | ns <sup>2</sup>                    | 2.3  | 1.1  |
|                             |           |                          | 130              |                                    | 1.1  | 1.7  |
|                             |           |                          | 125              | ns                                 | 4.2  | -1.1 |
| Seidu et al. (2020)         | China     | CuSO <sub>4</sub>        | 215              | ADG                                | 5.2  | -6.2 |
|                             |           |                          | 125              | ns                                 | 2.2  | 0.0  |
|                             |           |                          | 250              | ns                                 | 1.1  | -0.5 |
| Blavi et al. (2021)         | USA       | CuSO <sub>4</sub>        | 125              | ns                                 | 2.2  | 0.0  |
|                             |           | Cu <sub>2</sub> O        | 250              | ADG <sup>3</sup>                   | 6.7  | -2.9 |

<sup>1</sup>Significant level at  $P \leq 0.05$ . Difference is calculated as [(treatment value – control value) / control value] \* 100%.

<sup>2</sup>Polynomial contrasts were used for statistical analysis.

<sup>3</sup>Significant level at  $0.05 < P \leq 0.10$ .

<sup>4</sup>For experiments using factorial treatment structures, if the interaction of factors of either interested variable was observed the effect of the feed additive within each level of the other factor is included within the database.

<sup>5</sup>The top two comparisons were the results of the barrows and the bottom two comparisons were the results of the gilts.

<sup>6</sup>The top two comparisons were the results of the feeding Cu in grow-finish phase and the bottom two comparisons were the results of feeding Cu in the finish phase. The basal diet Lys concentrations from the top to bottom comparisons were at 92.5, 100, 92.5, and 100% of the requirement.

### 1.5.2. Carcass Characteristics – Cu

Back-fat significantly decreased ( $P \leq 0.05$ ) in 3 comparisons (average of 10.3%) and tended to decrease ( $0.05 < P \leq 0.10$ ) in 1 comparison (5.4%) compared to control pigs (Table S10). The

greatest proportion of the comparisons found no evidence of difference ( $P > 0.10$ ) in BF (69 comparisons). Of these, BF was numerically increased ( $P > 0.10$ ) in 24 comparisons (average of 3.5%) and numerically decreased ( $P > 0.10$ ) in 36 comparisons (average of 4.1%) compared to control pigs. Percentage lean significantly increased ( $P \leq 0.05$ ) in 2 comparisons (average of 1.1%) compared to control pigs. The greatest proportion of the comparisons found no evidence of difference ( $P > 0.10$ ) in percentage lean (23 comparisons). Of these, percentage lean was numerically increased ( $P > 0.10$ ) in 16 comparisons (average of 2.8%) and numerically decreased ( $P > 0.10$ ) in 7 comparisons (average of 1.1%) compared to control pigs. Loin muscle area/depth significantly increased ( $P \leq 0.05$ ) in 5 comparisons (average of 4.4%) and significantly decreased ( $P \leq 0.05$ ) in 1 comparison (7.5%) compared to control pigs. The greatest proportion of the comparisons found no evidence of difference ( $P > 0.10$ ) in LMA/LD (56 comparisons). Of these, LMA/LD was numerically increased ( $P > 0.10$ ) in 43 comparisons (average of 3.4%) and numerically decreased ( $P > 0.10$ ) in 11 comparisons (average of 1.4%) compared to control pigs.

**Table S10.** Studies on the effects of Cu on carcass characteristics.

| Author                                             | Country      | Form              | Inclusion,<br>mg/kg | Sig.            | Difference, % |       |                 |         |
|----------------------------------------------------|--------------|-------------------|---------------------|-----------------|---------------|-------|-----------------|---------|
|                                                    |              |                   |                     |                 | Yield         | BF    | percentage lean | LMA/L D |
| Lucas and Calder (1957), Exp. 1                    | UK           | CuSO <sub>4</sub> | 200                 | ns              | 1.3           | -7.5  | n/a             | 1.5     |
| Lucas and Calder (1957), Exp. 2                    | UK           | CuSO <sub>4</sub> | 200                 | ns              | -0.1          | -9.1  | n/a             | 2.7     |
| Bellis (1961)                                      | UK           | CuSO <sub>4</sub> | 125                 | ns              | 0.5           | n/a   | n/a             | n/a     |
|                                                    |              |                   | 250                 | ns              | 0.1           | n/a   | n/a             | n/a     |
|                                                    |              |                   | 62                  | ns              | 1.1           | -4.8  | n/a             | 1.4     |
| Lucas et al. (1961), Exp. 1                        | UK           | CuSO <sub>4</sub> | 125                 | ns              | 1.8           | 0.0   | n/a             | -0.7    |
|                                                    |              |                   | 250                 | ns              | 2.0           | 0.0   | n/a             | -1.4    |
|                                                    |              |                   | 62                  | ns              | -0.3          | 0.0   | n/a             | 5.4     |
| Lucas et al. (1961), Exp. 2                        | UK           | CuSO <sub>4</sub> | 125                 | ns              | 0.4           | 3.8   | n/a             | 2.5     |
|                                                    |              |                   | 250                 | ns              | 0.7           | 3.8   | n/a             | 5.0     |
|                                                    |              |                   | 250 <sup>4</sup>    | ns              | n/a           | 0.7   | n/a             | 1.4     |
| Braude et al. (1962)                               | UK           | CuSO <sub>4</sub> | 250 <sup>4</sup>    | ns              | n/a           | 1.4   | n/a             | 3.9     |
| Lucas et al. (1962)                                | UK           | CuSO <sub>4</sub> | 250                 | ns              | -0.1          | 4.4   | n/a             | 5.0     |
| Boyazoglu and Barrett (1970)                       | South Africa | CuSO <sub>4</sub> | 150                 | ns              | 0.0           | -7.5  | n/a             | 12.5    |
|                                                    |              |                   | 300                 | ns              | 0.6           | -10.0 | n/a             | 9.5     |
| Barber et al. (1971), Exp. 1                       | UK           | CuSO <sub>4</sub> | 250 <sup>4</sup>    | ns              | 1.1           | -1.2  | n/a             | n/a     |
|                                                    |              |                   | 250 <sup>4</sup>    | ns              | 0.4           | -17.0 | n/a             | n/a     |
| Barber et al. (1971), Exp. 2                       | UK           | CuSO <sub>4</sub> | 250 <sup>4</sup>    | ns              | 0.1           | -4.0  | n/a             | n/a     |
|                                                    |              |                   | 250 <sup>4</sup>    | ns              | 0.3           | 9.3   | n/a             | n/a     |
| Barber et al. (1971), Exp. 3                       | UK           | CuSO <sub>4</sub> | 250                 | ns              | -0.5          | -1.0  | n/a             | n/a     |
|                                                    |              |                   | 150                 |                 | 0.5           | 1.9   | n/a             | 1.9     |
| Braude and Ryder (1973)                            | UK           | CuSO <sub>4</sub> | 200                 | ns <sup>2</sup> | 0.7           | 0.0   | n/a             | 1.9     |
|                                                    |              |                   | 250                 |                 | 0.4           | 0.0   | n/a             | 3.4     |
| Gipp et al. (1973), Exp. 2                         | USA          | CuSO <sub>4</sub> | 250                 | LMA             | n/a           | -2.4  | -1.3            | -7.5    |
| Gipp et al. (1973), Exp. 3                         | USA          | CuSO <sub>4</sub> | 250                 | ns              | n/a           | -1.5  | 0.7             | 2.1     |
| NCR-42 Committee on Swine Nutrition (1974), Exp. 1 | USA          | CuSO <sub>4</sub> | 250                 | ns              | n/a           | -10.2 | n/a             | 4.3     |
| Bellis (1975)                                      | UK           | CuSO <sub>4</sub> | 175                 | ns              | 0.1           | -2.7  | n/a             | 1.0     |
|                                                    |              |                   | 175                 | ns              | 0.4           | 2.2   | n/a             | 1.7     |
| Castell et al. (1975), Exp. 1                      | Canada       | CuSO <sub>4</sub> | 125 <sup>5</sup>    | ns              | 1.9           | n/a   | n/a             | 0.0     |
|                                                    |              |                   | 200 <sup>5</sup>    | ns              | -0.1          | n/a   | n/a             | -2.3    |
|                                                    |              |                   | 125 <sup>5</sup>    | ns              | -1.4          | n/a   | n/a             | 1.7     |
|                                                    |              |                   | 200 <sup>5</sup>    | ns              | 1.1           | n/a   | n/a             | 5.6     |

|                               |           |                   |                  |    |      |       |      |      |
|-------------------------------|-----------|-------------------|------------------|----|------|-------|------|------|
| Castell et al. (1975), Exp. 2 | Canada    | CuSO <sub>4</sub> | 125 <sup>5</sup> | ns | 0.1  | n/a   | n/a  | 7.3  |
|                               |           |                   | 200 <sup>5</sup> | ns | -1.9 | n/a   | n/a  | 4.8  |
|                               |           |                   | 125 <sup>5</sup> | ns | -1.9 | n/a   | n/a  | -1.3 |
|                               |           |                   | 200 <sup>5</sup> | ns | 0.2  | n/a   | n/a  | 2.9  |
| Castell et al. (1975), Exp. 3 | Canada    | CuSO <sub>4</sub> | 125              | ns | 0.5  | 1.7   | n/a  | 3.7  |
|                               |           |                   | 200              | ns | 0.5  | 3.3   | n/a  | 3.0  |
| Castell et al. (1975), Exp. 4 | Canada    | CuSO <sub>4</sub> | 125              | ns | 1.0  | -1.9  | n/a  | 4.1  |
|                               |           |                   | 200              | ns | 0.8  | -4.6  | n/a  | 12.0 |
| Castell et al. (1975), Exp. 5 | Canada    | CuSO <sub>4</sub> | 125              | ns | 0.4  | -1.0  | n/a  | 3.4  |
|                               |           |                   | 200              | ns | 0.5  | -1.9  | n/a  | 2.7  |
| Hansen and Bresson (1975)     | Denmark   | CuSO <sub>4</sub> | 125              | ns | n/a  | 0.0   | n/a  | n/a  |
|                               |           |                   | 200              | ns | n/a  | 2.9   | n/a  | n/a  |
| Omole et al. (1976)           | Nigeria   | CuSO <sub>4</sub> | 125              | ns | -0.3 | 2.6   | n/a  | 3.4  |
|                               |           |                   | 200              | ns | 0.8  | -5.8  | n/a  | 14.5 |
| Barber et al. (1978)          | UK        | n/a               | 250              | BF | -0.3 | -8.1  | n/a  | n/a  |
| Barber et al. (1981), Exp. 1  | UK        | CuSO <sub>4</sub> | 250              | BF | -0.8 | -21.0 | n/a  | 0.6  |
| Barber et al. (1981), Exp. 2  | UK        | CuSO <sub>4</sub> | 250              | ns | 0.0  | 0.0   | n/a  | n/a  |
|                               |           |                   | 125              | ns | 0.4  | -3.2  | n/a  | n/a  |
|                               |           |                   | 200              | ns | 0.7  | -1.4  | n/a  | n/a  |
|                               |           |                   | 200/125          | ns | 1.1  | -2.7  | n/a  | n/a  |
| Braude and Hosking (1982)     | UK        | CuSO <sub>4</sub> | 250/125          | ns | 0.4  | -2.7  | n/a  | n/a  |
|                               |           |                   | 250/125          | ns | 0.4  | -2.7  | n/a  | n/a  |
|                               |           |                   | 183              | ns | -0.4 | 0.0   | n/a  | n/a  |
|                               |           |                   | 63               | ns | 1.1  | 3.1   | n/a  | n/a  |
| Astrup and Matre (1987)       | Norway    | CuSO <sub>4</sub> | 125              | ns | 0.7  | 2.7   | n/a  | n/a  |
|                               |           |                   | 250              | ns | 0.0  | -1.0  | n/a  | n/a  |
|                               |           |                   | 250              | ns | -0.7 | -5.4  | 1.4  | -0.9 |
| Ward et al. (1991)            | USA       | CuSO <sub>4</sub> | 250              | ns | n/a  | 2.9   | n/a  | -3.1 |
| Myer et al. (1992)            | USA       | CuSO <sub>4</sub> | 250              | ns | -0.7 | n/a   | n/a  | n/a  |
| Southern et al. (1993)        | USA       | NA                | 250              | ns | -0.7 | n/a   | n/a  | n/a  |
| Hernández et al. (2009)       | Australia | Cu-AA             | 50 <sup>4</sup>  | ns | -0.3 | -3.4  | n/a  | n/a  |
|                               |           |                   | 50 <sup>4</sup>  | ns | -0.6 | -13.6 | n/a  | n/a  |
| Coble et al. (2014)           | USA       | CuSO <sub>4</sub> | 50               | ns | -0.8 | 3.1   | -0.4 | 0.0  |
|                               |           |                   | 125              | ns | -0.1 | -1.6  | 0.1  | -0.4 |
|                               |           | Cu-AA             | 50               | ns | -0.6 | 3.1   | 34.7 | 1.1  |
| Feldpausch et al. (2016)      | USA       | CuSO <sub>4</sub> | 125 <sup>4</sup> | ns | 0.2  | -0.3  | 0.4  | 0.6  |
|                               |           |                   | 125 <sup>4</sup> | ns | -0.1 | 0.8   | 0.4  | 0.9  |
| Coble et al. (2017)           | USA       |                   | 75               |    | -0.8 | -5.8  | 1.4  | 2.2  |

|                             |     | CuSO <sub>4</sub> /T<br>BCC  | 150              | percenta<br>ge lean <sup>2</sup> ,<br>LD <sup>2</sup> | -0.5 | -2.6 | 0.8  | 2.1  |
|-----------------------------|-----|------------------------------|------------------|-------------------------------------------------------|------|------|------|------|
| Coble et al. (2018)         | USA | TBCC                         | 150              | ns                                                    | 0.2  | 0.0  | 0.0  | 0.6  |
|                             |     |                              | 150 <sup>4</sup> | ns                                                    | 0.0  | -1.8 | 0.3  | -1.1 |
| Coble et al. (2018), Exp. 1 | USA | TBCC                         | 150 <sup>4</sup> | ns                                                    | -0.5 | -3.0 | 1.3  | 1.2  |
|                             |     |                              | 150 <sup>4</sup> | ns                                                    | 0.3  | 1.9  | -0.4 | 2.6  |
|                             |     |                              | 150 <sup>6</sup> | ns                                                    | 2.2  | -6.0 | 1.3  | 0.9  |
| Coble et al. (2018), Exp. 2 | USA | TBCC                         | 150 <sup>6</sup> | ns                                                    | -0.2 | 7.1  | -1.2 | -1.2 |
|                             |     |                              | 150 <sup>6</sup> | ns                                                    | 0.9  | -6.5 | 1.3  | 0.9  |
|                             |     |                              | 150 <sup>6</sup> | ns                                                    | -0.4 | 7.7  | -2.7 | -2.6 |
|                             |     |                              | 70               |                                                       | 0.4  | 0.9  | -0.2 | 0.2  |
| Carpenter et al. (2019)     | USA | CuSO <sub>4</sub> /C<br>u-AA | 100              | ns <sup>2</sup>                                       | 0.4  | -0.6 | 0.1  | -0.5 |
|                             |     |                              | 130              |                                                       | -0.3 | -0.3 | 0.2  | 0.9  |
|                             |     |                              | 125              | ns                                                    | 0.3  | 11.5 | -1.2 | 5.5  |
|                             |     | CuSO <sub>4</sub>            | 250              | ns                                                    | 0.4  | -1.8 | 0.5  | 3.6  |
| Blavi et al. (2021)         | USA |                              | 125              | ns                                                    | 0.5  | 1.8  | 0.1  | 1.5  |
|                             |     | Cu <sub>2</sub> O            | 250              | ns                                                    | 0.5  | -9.7 | 1.3  | 6.6  |

<sup>1</sup>Significant level at  $P \leq 0.05$ . Difference is calculated as [(treatment value – control value) / control value] \* 100%.

<sup>2</sup>Polynomial contrasts were used for statistical analysis.

<sup>3</sup>Significant level at  $0.05 < P \leq 0.10$ .

<sup>4</sup>For experiments using factorial treatment structures, if the interaction of factors of either interested variable was observed the effect of the feed additive within each level of the other factor is included within the database.

<sup>5</sup>The top two comparisons were the results of the barrows and the bottom two comparisons were the results of the gilts.

<sup>6</sup>The top two comparisons were the results of the feeding Cu in grow-finish phase and the bottom two comparisons were the results of feeding Cu in the finish phase. The basal diet Lys concentrations from the top to bottom comparisons were at 92.5, 100, 92.5, and 100% of the requirement.

### 1.6. Zinc (Zn)

There were 13 research articles for Zn with 30 comparisons from 6 countries during the grow-finish or finishing period which met the requirements for inclusion. Of these, 30 comparisons reported growth performance data, and 21 comparisons reported carcass data. The growth-promotive levels of Zn were close to the control Zn levels used in most research (ranged approximately between 50 to 100 mg/kg); therefore, only trials with the total Zn level above or at approximately 100 mg/kg were used in this literature review. The difference in Zn levels between control diets and the growth-promotive Zn diets ranged between 38 to 400 mg/kg. The Zn sources used in the studies were inorganic (ZnO, ZnSO<sub>4</sub>, Zn-HCl, Zn hydroxy chloride) or organic form (Zinc glycinate, Zn-AA).

#### 1.6.1. Growth Performance – Zn

Average daily gain significantly increased ( $P \leq 0.05$ ) in 1 comparison (18.7%), tended to increase ( $0.05 < P \leq 0.10$ ) in 1 comparison (1.1%), and significantly decreased ( $P \leq 0.05$ ) in 1 comparison (14.4%) compared to control pigs (Table S11). The greatest proportion of the comparisons found no evidence of difference ( $P > 0.10$ ) in ADG (27 comparisons). Of these, ADG was numerically increased ( $P > 0.10$ ) in 12 comparisons (average of 4.0%) and numerically decreased ( $P > 0.10$ ) in 11 comparisons (average of 3.2%) compared to control pigs. Feed efficiency tended to increase ( $0.05 < P \leq 0.10$ ) in 4 comparisons (average of 1.2%) compared to control pigs. The greatest proportion of the comparisons found no evidence of

difference ( $P > 0.10$ ) in ADG (26 comparisons). Of these, G:F was numerically increased ( $P > 0.10$ ) in 14 comparisons (average of 4.2%) and numerically decreased ( $P > 0.10$ ) in 11 comparisons (average of 2.6%) compared to control pigs. Overall, the results suggest that Zn had positive but relatively small effects on ADG and G:F. Moreover, there were insufficient data to support whether different types of basal diets and inclusion levels affected the response to Zn for ADG and G:F.

**Table S11.** Studies on the effects of Zn on growth performance.

| Author                           | Country   | Zn                                    | Basal,<br>mg/kg | Added,<br>mg/kg  | Sig. <sup>1</sup>  | Difference, % <sup>1</sup> |      |
|----------------------------------|-----------|---------------------------------------|-----------------|------------------|--------------------|----------------------------|------|
|                                  |           |                                       |                 |                  |                    | ADG                        | G:F  |
| Kline et al. (1972)              | USA       | ZnSO <sub>4</sub>                     | 100             | 100 <sup>4</sup> | ns                 | 8.1                        | -5.1 |
|                                  |           |                                       | 100             | 200 <sup>4</sup> | ns                 | -1.8                       | 14.4 |
|                                  |           |                                       | 100             | 100 <sup>4</sup> | ns                 | -8.8                       | -0.3 |
|                                  |           |                                       | 100             | 200 <sup>4</sup> | ns                 | -9.7                       | 1.3  |
|                                  |           |                                       | 100             | 100 <sup>4</sup> | ns                 | 0.0                        | -3.7 |
|                                  |           |                                       | 100             | 200 <sup>4</sup> | ns                 | 5.7                        | -2.5 |
| Omole et al. (1976)              | Nigeria   | Zn powder                             | 50              | 100 <sup>4</sup> | ns                 | 11.9                       | 9.0  |
|                                  |           |                                       | 50              | 100 <sup>4</sup> | ns                 | 9.7                        | 5.0  |
| Eisemann et al. (1979)           | USA       | ZnO                                   | 100             | 400              | ns                 | 2.7                        | 4.4  |
| Wedekind et al. (1994)           | USA       | ZnSO <sub>4</sub>                     | 52              | 60               | ns                 | -3.4                       | 0.0  |
| Rupić et al. (1997)              | Croatia   | ZnSO <sub>4</sub>                     | 37              | 84               | ADG                | 18.7                       | 3.8  |
| Hernández et al. (2009)          | Australia | Zn-AA                                 | 70              | 40 <sup>4</sup>  | ns                 | 0.2                        | -1.5 |
|                                  |           |                                       | 70              | 40 <sup>4</sup>  | ns                 | 1.8                        | 1.5  |
|                                  |           |                                       | 70              | 40 <sup>4</sup>  | ns                 | 2.7                        | 2.2  |
|                                  |           |                                       | 70              | 40 <sup>4</sup>  | ns                 | -3.0                       | 3.7  |
| Paulk et al. (2014)              | USA       | ZnO                                   | 50              | 75 <sup>5</sup>  | ns                 | 0.0                        | -2.9 |
|                                  |           |                                       | 50              | 75 <sup>5</sup>  | ns                 | -1.8                       | -2.1 |
| Feldpausch et al. (2016)         | USA       | ZnO                                   | 110             | 150 <sup>4</sup> | ns                 | 1.0                        | 1.3  |
|                                  |           |                                       | 110             | 150 <sup>4</sup> | ns                 | 0.0                        | -1.3 |
| Holen et al. (2018)              | USA       | Zn-AA                                 | 70              | 40               | ns                 | 2.2                        | 3.7  |
|                                  |           | ZnSO <sub>4</sub>                     | 70              | 80               | ns                 | 1.1                        | 3.4  |
|                                  |           |                                       | 70              | 80               | ns                 | 2.2                        | 2.5  |
| Cemin et al. (2019)              | USA       | Zn                                    | 113             | 50               | ADG <sup>2,3</sup> | 1.1                        | -0.3 |
|                                  |           | hydroxychloride/<br>ZnSO <sub>4</sub> | 113             | 50               |                    | 0.0                        | -0.8 |
| Cemin et al. (2019)              | USA       | Zn<br>hydroxychloride                 | 50              | 37.5             | G:F <sup>2,3</sup> | -2.1                       | 0.5  |
|                                  |           |                                       | 50              | 75               |                    | -1.1                       | 1.9  |
|                                  |           |                                       | 50              | 112.5            |                    | -1.1                       | 1.4  |
|                                  |           |                                       | 50              | 150              |                    | -1.1                       | 0.8  |
| Villagómez-Estrada et al. (2021) | Spain     | ZnSO <sub>4</sub> /Zn-HCl             | 60              | 60               | ns                 | -1.4                       | 1.4  |
| Natalello et al. (2022)          | Italy     | Zn glycinate                          | 22.3            | 100              | ADG                | -14.4                      | -7.6 |

---

<sup>1</sup>Significant level at  $P \leq 0.05$ . Difference is calculated as [(treatment value – control value) / control value] \* 100%.

<sup>2</sup>Polynomial contrasts were used for statistical analysis.

<sup>3</sup>Significant level at  $0.05 < P \leq 0.10$ .

<sup>4</sup>For experiments using factorial treatment structures, if the interaction of factors of either interested variable was observed the effect of the feed additive within each level of the other factor is included within the database.

<sup>5</sup>High Zn diet was fed for 72 d in the top comparison and 27 d in the below comparison.

### 1.6.2. Carcass Characteristics - Zn

Back-fat significantly increased ( $P \leq 0.05$ ) in 1 comparison (13.1%) compared to control pigs. The greatest proportion of the comparisons found no evidence of difference ( $P > 0.10$ ) in BF (18 comparisons; Table S12). Of these, BF was numerically increased ( $P > 0.10$ ) in 5 comparisons (average of 1.3%) and numerically decreased ( $P > 0.10$ ) in 11 comparisons (average of 2.9%) compared to control pigs. All the comparisons found no evidence of difference ( $P > 0.10$ ) in ADG (14 comparisons). Of these, percentage lean was numerically increased ( $P > 0.10$ ) in 12 comparisons (average of 1.1%) and numerically decreased ( $P > 0.10$ ) in 1 comparison (0.4%) compared to control pigs. All the comparisons found no evidence of difference ( $P > 0.10$ ) in LMA/LD (15 comparisons). Of these, LMA/LD was numerically increased ( $P > 0.10$ ) in 11 comparisons (average of 0.9%) and numerically decreased ( $P > 0.10$ ) in 4 comparisons (average of 1.5%) compared to control pigs.

**Table S12.** Studies on the effects of Zn on carcass characteristics.

| Author                           | Country   | Zn                                           | Basal,<br>mg/kg | Added,<br>mg/kg  | Sig. <sup>1</sup>     | Difference, % <sup>1</sup> |      |                        |            |
|----------------------------------|-----------|----------------------------------------------|-----------------|------------------|-----------------------|----------------------------|------|------------------------|------------|
|                                  |           |                                              |                 |                  |                       | Yield                      | BF   | percent<br>age<br>lean | LMA/L<br>D |
| Omole et al. (1976)              | Nigeria   | Zn powder                                    | 50              | 100 <sup>4</sup> | ns                    | -0.5                       | -5.1 | n/a                    | 2.6        |
|                                  |           |                                              | 50              | 100 <sup>4</sup> | ns                    | -0.2                       | 0.9  | n/a                    | -2.9       |
|                                  |           |                                              | 70              | 40 <sup>4</sup>  | ns                    | 0.0                        | 3.4  | n/a                    | n/a        |
| Hernández et al. (2009)          | Australia | Zn-AA                                        | 70              | 40 <sup>4</sup>  | ns                    | 0.9                        | -6.0 | n/a                    | n/a        |
|                                  |           |                                              | 70              | 40 <sup>4</sup>  | ns                    | -0.3                       | 13.1 | n/a                    | n/a        |
|                                  |           |                                              | 70              | 40 <sup>4</sup>  | ns                    | -0.3                       | -7.6 | n/a                    | n/a        |
| Paulk et al. (2014)              | USA       | ZnO                                          | 50              | 75 <sup>5</sup>  | ns                    | -0.1                       | -1.7 | 3.9                    | 0.4        |
|                                  |           |                                              | 50              | 75 <sup>5</sup>  | ns                    | 1.2                        | 0.8  | 3.2                    | -1.8       |
| Feldpausch et al. (2016)         | USA       | ZnO                                          | 110             | 150 <sup>4</sup> | ns                    | 0.1                        | -1.6 | 0.1                    | 0.1        |
|                                  |           |                                              | 110             | 150 <sup>4</sup> | ns                    | -0.3                       | -0.5 | 0.1                    | 0.4        |
| Holen et al. (2018)              | USA       | Zn-AA                                        | 70              | 40               | ns                    | -0.4                       | 0.9  | 0.2                    | 0.8        |
|                                  |           | ZnSO <sub>4</sub>                            | 70              | 80               | ns                    | 0.3                        | -3.2 | 0.3                    | -0.4       |
|                                  |           |                                              | 70              | 80               | ns                    | 0.5                        | -2.3 | 1.3                    | 2.7        |
| Cemin et al. (2019)              | USA       | Zn<br>hydroxychlor<br>ide/ ZnSO <sub>4</sub> | 113             | 50               | Yield<br><sup>2</sup> | 1.4                        | 0.0  | 1.4                    | 0.5        |
|                                  |           |                                              | 113             | 100              |                       | 1.4                        | 0.0  | 1.5                    | 0.7        |
| Cemin et al. (2019)              | USA       | Zn<br>hydroxychlor<br>ide                    | 50              | 37.5             | ns <sup>2</sup>       | -0.3                       | 0.0  | 0.2                    | 0.6        |
|                                  |           |                                              | 50              | 75               |                       | -0.5                       | -1.7 | 0.2                    | -0.9       |
|                                  |           |                                              | 50              | 112.5            |                       | -0.1                       | 0.6  | 0.0                    | 0.7        |
|                                  |           |                                              | 50              | 150              |                       | -0.1                       | -1.7 | 0.4                    | 0.1        |
| Villagómez-Estrada et al. (2021) | Spain     | ZnSO <sub>4</sub> /Zn-HCl                    | 60              | 60               | ns                    | 0.3                        | n/a  | -0.4                   | n/a        |
| Natalello et al. (2022)          | Italy     | Zn glycinate                                 | 22.3            | 100              | ns                    | -0.2                       | n/a  | n/a                    | n/a        |

<sup>1</sup>Significant level at  $P \leq 0.05$ . Difference is calculated as [(treatment value – control value) / control value] \* 100%.

<sup>2</sup>Polynomial contrasts were used for statistical analysis.

<sup>3</sup>Significant level at  $0.05 < P \leq 0.10$ .

<sup>4</sup>For experiments using factorial treatment structures, if the interaction of factors of either interested variable was observed the effect of the feed additive within each level of the other factor is included within the database.

<sup>5</sup>High Zn diet was fed for 72 d in the top comparison and 27 d in the below comparison.

## 2. Feed Additives – Energy and Lipid Metabolism

This section discusses the feed additives that can potentially improve growth performance and carcass characteristics by affecting the energy and lipid metabolism of grow-finish pigs.

The feed additives discussed are betaine, Cr, CLA, and L-carnitine.

### 2.1. *Betaine*

There were 20 research articles for betaine with 37 comparisons from 9 countries during the grow-finish or finishing period with added dietary levels of 0.02 to 1.05 %. Of these, all comparisons reported growth performance data, and 32 comparisons reported carcass data.

#### 2.1.1. *Growth Performance - Betaine*

Average daily gain significantly increased ( $P \leq 0.05$ ) in 7 comparisons (average of 10.6%), tended to increase ( $0.05 < P \leq 0.10$ ) in 1 comparison (4.3%), and significantly decreased ( $P \leq 0.05$ ) in 2 comparisons (average of 2.8%) compared to control pigs (Table S13). The greatest proportion of the comparisons found no evidence of difference ( $P > 0.10$ ) in ADG (27 comparisons). Of these, ADG was numerically increased ( $P > 0.10$ ) in 10 comparisons (average of 2.4%) and numerically decreased in 15 comparisons (average of 3.3%) compared to control pigs. Feed efficiency significantly increased ( $P \leq 0.05$ ) in 5 comparisons (average of 13.2%) and significantly decreased ( $P \leq 0.05$ ) in 1 comparison (0.4%) compared to control pigs. The greatest proportion of the comparisons found no evidence of difference ( $P > 0.10$ ) in G:F (29 comparisons). Of these, G:F was numerically increased ( $P > 0.10$ ) in 18 comparisons (average of

2.7%) and numerically decreased in 9 comparisons (average of 2.3%) compared to control pigs.

Most comparisons (19 comparisons) had added betaine levels of 0.1 and 0.125%; therefore, the

effect of betaine levels is not evaluated. There were insufficient data to support whether

different types of basal diets affected the response to betaine for ADG and G:F. However,

betaine may have a more beneficial effect on ADG and G:F in limit-fed pigs [176, 177]. In

summary, the results suggest that betaine had relatively small positive effects on ADG (1.3%

improvement) but may benefit G:F more (2.7% improvement).

**Table S13.** Studies on the effects of dietary betaine on growth performance.

| Authors                       | Country     | Inclusion, %       | Sig. <sup>1</sup>                  | Difference, % <sup>1</sup> |      |
|-------------------------------|-------------|--------------------|------------------------------------|----------------------------|------|
|                               |             |                    |                                    | ADG                        | G:F  |
| Smith et al. (1994)           | USA         | 0.100 <sup>4</sup> | ADG <sup>3</sup>                   | 5.7                        | 2.4  |
|                               |             | 0.100 <sup>4</sup> | ns                                 | 1.1                        | -1.3 |
| Smith et al. (1994)           | USA         | 0.100              | ns                                 | 3.3                        | 4.1  |
| Matthews et al. (1998), Exp 1 | USA         | 0.125              | ns                                 | -0.5                       | -3.6 |
| Matthews et al. (1998), Exp 2 | USA         | 0.125              | ns                                 | 0.0                        | 5.6  |
| Øverland et al. (1999)        | Norway      | 1.050              | ns                                 | 4.2                        | 2.3  |
| Matthews et al. (2001)        | USA         | 0.250              | ns                                 | 0.0                        | 0.4  |
|                               |             | 0.125              |                                    | -3.6                       | 6.7  |
| Matthews et al. (2001)        | USA         | 0.250              | ns <sup>2</sup>                    | -8.3                       | 3.3  |
|                               |             | 0.500              |                                    | -8.3                       | 0.4  |
| Young et al. (2001)           | USA         | 0.140              | ns                                 | -1.6                       | -1.3 |
| Lawrence et al. (2002), Exp 1 | USA         | 0.125 <sup>5</sup> | ns                                 | -0.6                       | 2.3  |
|                               |             | 0.125 <sup>5</sup> | ns                                 | 3.1                        | 2.7  |
| Lawrence et al. (2002), Exp 2 | USA         | 0.100              | ns                                 | 0.9                        | 3.8  |
|                               |             | 0.025              |                                    | -0.5                       | -0.4 |
| Siljander-Rasi et al. (2003)  | Finland     | 0.050              | ADG <sup>2</sup> , GF <sup>2</sup> | 6.8                        | 5.6  |
|                               |             | 0.100              |                                    | 9.7                        | 7.5  |
| Feng et al. (2006)            | China       | 0.125              | ns                                 | 4.6                        | 1.6  |
| Dunshea et al. (2009)         | Australia   | 0.150              | ns                                 | 2.1                        | 0.9  |
| Huang et al. (2009)           | China       | 0.125              | ADG                                | 5.5                        | 2.6  |
| Nakev et al. (2009)           | Bulgaria    | 0.100 <sup>6</sup> | ns                                 | -7.1                       | n/a  |
|                               |             | 0.100 <sup>6</sup> | ns                                 | -4.5                       | n/a  |
| Yang et al. (2009)            | South Korea | 0.200              | ADG, G:F                           | 3.3                        | 15.0 |
|                               |             | 0.400              | ADG, G:F                           | 27.5                       | 23.2 |
|                               |             | 0.600              | ADG, G:F                           | 17.6                       | 14.6 |
| Van Heugten (2014), Exp 1     | USA         | 0.200              | ns                                 | -2.9                       | 1.2  |
|                               |             | 0.063              |                                    | -2.1                       | -1.3 |
| Van Heugten (2014), Exp 2     | USA         | 0.125              | ns <sup>2</sup>                    | -1.1                       | -1.6 |
|                               |             | 0.188              |                                    | 0.8                        | 1.6  |
| Madeira et al. (2015)         | USA         | 0.330              | ns                                 | 1.1                        | 0.4  |
| Wang et al. (2015)            | China       | 0.100              | ns                                 | 1.2                        | 0.0  |

|                              |             |       |                 |      |      |
|------------------------------|-------------|-------|-----------------|------|------|
| Lothong et al. (2016)        | Thailand    | 0.100 | ns              | -5.6 | -6.3 |
| Mendoza et al. (2017), Exp 1 | USA         | 0.200 | ADG             | -5.1 | -1.1 |
| Mendoza et al. (2017), Exp 2 | USA         | 0.063 | ns <sup>2</sup> | -1.2 | -1.0 |
|                              |             | 0.125 |                 | -1.8 | -3.0 |
|                              |             | 0.188 |                 | -0.1 | 0.0  |
| Lan and Kim (2018)           | South Korea | 0.100 | ADG             | 3.7  | 2.9  |

<sup>1</sup>Significant level at  $P \leq 0.05$ . Difference is calculated as [(treatment value – control value) / control value] \* 100%.

<sup>2</sup>Polynomial contrasts were used for statistical analysis.

<sup>3</sup>Significant level at  $0.05 < P \leq 0.10$ .

<sup>4</sup>The top comparison used a solid form of betaine and the bottom comparison used a liquid form betaine.

<sup>5</sup>Treatment diets were fed from 82 to 106 kg in the top comparison and fed from 104 to 116 kg in the bottom comparison.

<sup>6</sup>The top comparison represented male pigs and the bottom comparison represented female pigs.

#### 2.1.2. Carcass Characteristics - Betaine

Back-fat significantly decreased ( $P \leq 0.05$ ) in 3 comparisons (average of 10.7%) compared to control pigs (Table S14). The greatest proportion of the comparisons found no evidence of difference ( $P > 0.10$ ) in BF (29 comparisons). Of these, BF was numerically increased ( $P > 0.10$ ) in 13 comparisons (average of 2.0%) and numerically decreased in 16 comparisons (average of 2.9%) compared to control pigs. Percentage lean significantly increased ( $P \leq 0.05$ ) in 1 comparison (5.2%) compared to control pigs. The greatest proportion of the comparisons found no evidence of difference ( $P > 0.10$ ) in percentage lean (24 comparisons). Of these, percentage lean was numerically increased ( $P > 0.10$ ) in 15 comparisons (average of 3.6%) and numerically decreased in 8 comparisons (average of 1.2%) compared to control pigs. Loin muscle area/depth tended to increase ( $0.05 < P \leq 0.10$ ) in 1 comparison (6.3%) and significantly decreased ( $P \leq 0.05$ ) in 3 comparisons (average of 2.3%) compared to control pigs. The greatest

proportion of the comparisons found no evidence of difference ( $P > 0.10$ ) in LMA/LD (20 comparisons). Of these, LMA/LD was numerically increased ( $P > 0.10$ ) in 10 comparisons (average of 1.9%) and numerically decreased in 10 comparisons (average of 2.2%) compared to control pigs

**Table S14.** Studies on the effects of dietary betaine on carcass characteristics.

| Authors                       | Country   | Inclusion, %       | Sig. <sup>1</sup> | Difference, % <sup>1</sup> |       |                 |        |
|-------------------------------|-----------|--------------------|-------------------|----------------------------|-------|-----------------|--------|
|                               |           |                    |                   | Yield                      | BF    | percentage lean | LMA/LD |
| Smith et al. (1994)           | USA       | 0.100 <sup>4</sup> | LMA <sup>3</sup>  | n/a                        | -3.2  | 1.6             | 6.3    |
|                               |           | 0.100 <sup>4</sup> | ns                | n/a                        | 0.8   | 2.6             | 8.9    |
| Smith et al. (1994)           | USA       | 0.100              | ns                | n/a                        | -3.2  | 0.5             | -1.6   |
| Matthews et al. (1998), Exp 1 | USA       | 0.125              | Yield             | 0.9                        | 1.4   | -0.2            | 0.5    |
| Matthews et al. (1998), Exp 2 | USA       | 0.125              | ns                | 0.0                        | 2.3   | -0.6            | 2.1    |
| Øverland et al. (1999)        | Norway    | 1.050              | ns                | 1.2                        | 0.7   | 0.8             | n/a    |
| Matthews et al. (2001)        | USA       | 0.250              | ns                | -0.4                       | 4.8   | -1.1            | -0.4   |
|                               |           | 0.125              |                   | -1.5                       | -4.3  | 1.2             | -3.0   |
| Matthews et al. (2001)        | USA       | 0.250              | BF <sup>2</sup>   | 1.1                        | -18.2 | 5.2             | 0.7    |
|                               |           | 0.500              |                   | 0.1                        | -12.6 | -0.8            | -5.6   |
| Lawrence et al. (2002), Exp 1 | USA       | 0.125 <sup>5</sup> | ns                | 0.3                        | -0.4  | 0.6             | 1.5    |
|                               |           | 0.125 <sup>5</sup> | ns                | 0.0                        | -0.4  | -1.6            | -0.4   |
| Lawrence et al. (2002), Exp 2 | USA       | 0.100              | BF                | n/a                        | -3.2  | n/a             | -0.4   |
|                               |           | 0.025              |                   | n/a                        | -3.0  | n/a             | n/a    |
| Siljander-Rasi et al. (2003)  | Finland   | 0.050              | ns <sup>2</sup>   | n/a                        | 1.0   | n/a             | n/a    |
|                               |           | 0.100              |                   | n/a                        | -3.0  | n/a             | n/a    |
| Feng et al. (2006)            | China     | 0.125              | ns                | 0.6                        | -7.0  | 2.1             | 2.2    |
| Dunshea et al. (2009)         | Australia | 0.150              | ns                | n/a                        | 4.5   | 0.9             | n/a    |
|                               |           |                    | BF,               |                            |       |                 |        |
| Huang et al. (2009)           | China     | 0.125              | percentage lean   | 0.6                        | -10.3 | 5.2             | n/a    |
|                               |           | 0.100 <sup>6</sup> | ns                | ns                         | 0.2   | -6.3            | 2.4    |
| Nakev et al. (2009)           | Bulgaria  | 0.100 <sup>6</sup> | ns                | ns                         | 5.4   | 7.4             | -4.8   |
| Van Heugten (2014), Exp 1     | USA       | 0.200              | ns                | -0.4                       | 1.8   | -0.2            | 0.7    |
|                               |           | 0.063              |                   | -0.5                       | -3.4  | 0.2             | -1.5   |
| Van Heugten (2014), Exp 2     | USA       | 0.125              | LD <sup>2</sup>   | -0.3                       | -1.5  | 0.0             | -1.5   |
|                               |           | 0.188              |                   | -0.1                       | -3.9  | 0.2             | -3.9   |
| Madeira et al. (2015)         | USA       | 0.330              | ns                | 0.2                        | -1.5  | n/a             | n/a    |
| Wang et al. (2015)            | China     | 0.100              | ns                | 3.4                        | 0.8   | n/a             | n/a    |
| Lothong et al. (2016)         | Thailand  | 0.125              | BF                | n/a                        | -18.6 | n/a             | n/a    |
| Mendoza et al. (2017), Exp 1  | USA       | 0.200              | ns                | 0.1                        | 0.9   | -0.1            | 0.2    |
|                               | USA       | 0.063              | ns <sup>2</sup>   | -0.7                       | 0.2   | 11.4            | -2.1   |

|                            |       |      |     |      |      |
|----------------------------|-------|------|-----|------|------|
| Mendoza et al. (2017), Exp | 0.125 | -0.4 | 0.2 | 11.6 | -1.3 |
| 2                          | 0.188 | -0.3 | 1.3 | 12.4 | -0.6 |

<sup>1</sup>Significant level at  $P \leq 0.05$ . Difference is calculated as [(treatment value – control value) / control value] \* 100%.

<sup>2</sup>Polynomial contrasts were used for statistical analysis.

<sup>3</sup>Significant level at  $0.05 < P \leq 0.10$ .

<sup>5</sup>The top comparison used a solid form of betaine and the bottom comparison used a liquid form betaine.

<sup>4</sup>Treatment diets were fed from 82 to 106 kg in the top comparison and fed from 104 to 116 kg in the bottom comparison.

<sup>6</sup>The top comparison represented male pigs and the bottom comparison represented female pigs.

## 2.2. Chromium (Cr)

There were 50 research articles for Cr with 139 comparisons from 9 countries during the grow-finish or finishing period with added dietary levels of 25 to 1,000 µg/kg (1 experiment used 5,000 µg/kg Cr as an overdose trial). Of these, 139 comparisons reported growth performance data, and 133 comparisons reported carcass data. The sources of Cr were Cr picolinate, Cr propionate, Cr nicotinate, Cr methionine, Cr yeast, CrCl<sub>3</sub>, Cr nanocomposites, Cr sulfate, and Cr bis-glycinate-nicotinamide chelate.

### 2.2.1. Growth Performance - Cr

Average daily gain significantly increased ( $P \leq 0.05$ ) in 14 comparisons (average of 8.9%), tended to increase ( $0.05 < P \leq 0.10$ ) in 4 comparisons (average of 4.6%), significantly decreased ( $P \leq 0.05$ ) in 7 comparisons (average of 7.2%), and tended to decrease ( $0.05 < P \leq 0.10$ ) in 5 comparisons (average of 4.1%) compared to control pigs (Table S15). The greatest proportion of the comparisons found no evidence of difference ( $P > 0.10$ ) in ADG (109 comparisons). Of these, ADG was numerically increased ( $P > 0.10$ ) in 51 comparisons (average of 3.6%) and numerically decreased ( $P > 0.10$ ) in 48 comparisons (average of 2.2%) compared to control pigs. Feed efficiency significantly increased ( $P \leq 0.05$ ) in 14 comparisons (average of 5.2%) and significantly decreased ( $P \leq 0.05$ ) in 7 comparisons (average of 4.3%) compared to control pigs. The greatest proportion of the comparisons found no evidence of difference ( $P > 0.10$ ) in G:F (117 comparisons). Of these, G:F was numerically increased ( $P > 0.10$ ) in 60 comparisons

(average of 3.1%) and numerically decreased ( $P > 0.10$ ) in 41 comparisons (average of 2.1%) compared to control pigs. These studies found no evidence of difference because Cr's effects were not large enough and variation in performance was too great. Also, the basal diets might have provided enough Cr to meet the requirement; therefore, increasing the level of Cr did not have a significant effect on ADG and G:F [195-200]. Overall, the data suggest that Cr positively affected ADG and G:F, but the effects were small and inconsistent. The addition of 50 to 400  $\mu\text{g/kg}$  Cr in diets was most common and had better improvement on ADG and GF compared to the higher levels. However, there were not enough comparisons at greater Cr levels to fully determine the effect of high Cr levels. Moreover, toxicity of Cr at a high inclusion level (5,000  $\mu\text{g/kg}$ ) was not observed [201]. Chromium chelated with methionine or in nanoparticle form may provide a more consistently positive effect on ADG; however, Cr form did not seem to affect the consistency of the G:F response. According to our database, Cr minorly improved ADG and G:F of pigs (approximately 1% improvement). This is in agreement with a meta-analysis that analyzed data from 31 studies and found that grow-finish pigs fed 200 to 500  $\mu\text{g/kg}$  Cr had improved ( $P \leq 0.05$ ) ADG and G:F compared to the control pigs [202].

**Table S15.** Studies on the effects of dietary chromium on growth performance.

| Authors                       | Country | Source     | Inclusion,<br>$\mu\text{g/kg}$ | Sig. <sup>1</sup> | Difference, % |      |
|-------------------------------|---------|------------|--------------------------------|-------------------|---------------|------|
|                               |         |            |                                |                   | ADG           | G:F  |
| Page et al. (1993),<br>Exp. 1 | USA     | Picolinate | 25                             | ADG <sup>2</sup>  | 0.0           | 6.9  |
|                               |         |            | 50                             |                   | 4.1           | 4.5  |
|                               |         |            | 100                            |                   | -5.9          | -0.3 |
|                               |         |            | 200                            |                   | 7.8           | 5.5  |
| Page et al. (1993),<br>Exp. 2 | USA     | Picolinate | 100                            | ADG <sup>2</sup>  | -1.2          | 2.1  |
|                               |         |            | 200                            |                   | -0.7          | -0.3 |
|                               |         |            | 400                            |                   | -6.2          | 5.4  |
|                               |         |            | 800                            |                   | -9.1          | -0.9 |

|                                         |                |                   |                  |                           |      |      |
|-----------------------------------------|----------------|-------------------|------------------|---------------------------|------|------|
| Page et al. (1993),<br>Exp. 3           | USA            | CrCl <sub>3</sub> | 200 <sup>4</sup> | ns                        | 6.0  | 6.4  |
|                                         |                |                   | 200 <sup>4</sup> | ns                        | 4.2  | 1.2  |
| Smith et al. (1994)                     | USA            | Picolinate        | 100 and 200      | ns                        | 5.9  | -2.7 |
|                                         |                |                   | 200              | ns                        | 2.0  | 1.7  |
| Boleman et al. (1995)                   | USA            | Picolinate        | 200 <sup>5</sup> | ADG                       | -6.4 | 0.0  |
|                                         |                |                   | 200 <sup>5</sup> | ns                        | -5.8 | 3.2  |
| Lindemann et al.<br>(1995), Exp. 1      | USA            | Picolinate        | 250              | ns <sup>2</sup>           | 1.0  | 8.1  |
|                                         |                |                   | 500              |                           | -3.1 | 6.4  |
| Lindemann et al.<br>(1995), Exp. 2      | USA            | Picolinate        | 200 <sup>4</sup> | ns                        | -2.4 | 6.8  |
|                                         |                |                   | 200 <sup>4</sup> | ns                        | -1.2 | -2.3 |
| Lindemann et al.<br>(1995), Exp. 3      | USA            | Picolinate        | 100              | ns <sup>2</sup>           | 1.2  | -0.3 |
|                                         |                |                   | 500              |                           | 1.2  | -2.9 |
|                                         |                |                   | 1000             |                           | -2.4 | -1.1 |
| Mooney and<br>Cromwell (1995)           | USA            | Picolinate        | 200              | ADG <sup>3</sup>          | 5.4  | 1.9  |
| Smith et al. (1996)                     | USA            | Nicotinate        | 200              | ns                        | -1.7 | -0.2 |
| Kornegay et al.<br>(1997)               | USA            | Picolinate        | 200              | ns                        | 2.5  | n/a  |
| Min et al. (1997)                       | South<br>Korea | Picolinate        | 100              | ns                        | -0.7 | 0.3  |
|                                         |                |                   | 200              | ns                        | -3.3 | 0.3  |
|                                         |                |                   | 400              | ns                        | -0.5 | 2.5  |
| Mooney and<br>Cromwell (1997)           | USA            | Picolinate        | 200              | ns                        | 2.3  | 1.4  |
|                                         |                | CrCl <sub>3</sub> | 5,000            | ns                        | -1.1 | -1.4 |
| Ward et al. (1997)                      | USA            | Picolinate        | 400 <sup>4</sup> | ns                        | 1.9  | 5.7  |
|                                         |                |                   | 400 <sup>4</sup> | ns                        | -2.1 | -5.4 |
|                                         |                |                   | 400 <sup>4</sup> | ns                        | 4.0  | 3.9  |
|                                         |                |                   | 400 <sup>4</sup> | ns                        | -1.7 | -2.7 |
| Lien et al. (1998)                      | Taiwan         | Picolinate        | 200              | ns                        | -1.9 | 10.3 |
|                                         |                |                   | 50               |                           | 4.6  | 1.1  |
| O'Quinn et al. (1998)                   | USA            | Nicotinate        | 100              | ADG <sup>2,3</sup>        | -2.1 | -0.9 |
|                                         |                |                   | 200              |                           | -3.6 | -1.7 |
|                                         |                |                   | 400              |                           | -3.2 | 0.2  |
|                                         |                | Picolinate        | 200              | ns                        | -0.8 | -1.6 |
| Lemme et al. (1999)                     | USA            | Yeast             | 200              | ADG <sup>3</sup> ,<br>G:F | 5.9  | 6.5  |
|                                         |                |                   | 400              | ns                        | 0.1  | 1.8  |
|                                         |                |                   | 800              | ns                        | -0.7 | 1.1  |
| Mooney and<br>Cromwell (1999),<br>Exp.1 | USA            | Picolinate        | 200              | ns                        | -0.6 | -2.6 |
| Mooney and<br>Cromwell (1999),<br>Exp.2 | USA            | Picolinate        | 200              | ns                        | -1.2 | 1.1  |
| O'Quinn et al. (1999)                   | USA            | Nicotinate        | 50 <sup>4</sup>  | G:F                       | 0.7  | 4.4  |
|                                         |                |                   | 50 <sup>4</sup>  | G:F                       | 4.7  | 6.8  |
| Hanczakowska et al.<br>(1999)           | Poland         | Yeast             | (0.03%)          | G:F                       | 2.2  | -4.7 |
|                                         |                | Picolinate        | 200 <sup>4</sup> | ns                        | -0.5 | -0.3 |
| Matthews et al.<br>(2001)               | USA            | Picolinate        | 200              | ns                        | 0.0  | -1.4 |
|                                         |                | Propionate        | 200              | ns                        | -1.1 | 2.4  |
| Xi et al. (2001)                        | USA            | Picolinate        | 200              | ns                        | 3.6  | 3.1  |
| Matthews et al.<br>(2003)               | USA            | Propionate        | 200              | ns                        | -0.5 | 1.4  |
| Shelton et al. (2003),<br>Exp. 1        | USA            | Propionate        | 50               | ns <sup>2</sup>           | -2.5 | 3.3  |
|                                         |                |                   | 100              |                           | 0.0  | 3.3  |

|                                  |                |                                      |                  |                                        |       |       |
|----------------------------------|----------------|--------------------------------------|------------------|----------------------------------------|-------|-------|
|                                  |                |                                      | 200              |                                        | -2.5  | 3.3   |
|                                  |                |                                      | 200 <sup>4</sup> | ns                                     | -2.5  | 3.3   |
|                                  |                |                                      | 200 <sup>4</sup> | ns                                     | -2.6  | 3.6   |
| Shelton et al. (2003),<br>Exp. 2 | USA            | Propionate                           | 100              |                                        | 1.0   | -5.6  |
|                                  |                |                                      | 200              | ns <sup>2</sup>                        | -1.0  | -2.8  |
|                                  |                |                                      | 300              |                                        | -1.0  | -2.8  |
| Waylan et al. (2003)             | USA            | Nicotinate                           | 50               | G:F                                    | 2.9   | 5.4   |
|                                  |                | Picolinate                           | 100              | ns <sup>2</sup>                        | -2.6  | 1.8   |
| Groesbeck et al.<br>(2004)       | USA            |                                      | 200              |                                        | -3.7  | -1.5  |
|                                  |                | Propionate                           | 100              | ns <sup>2</sup>                        | 0.0   | 0.3   |
|                                  |                |                                      | 200              |                                        | -1.6  | -0.9  |
| Wang and Xu (2004)               | China          | Nano Cr                              | 200              | G:F                                    | 5.6   | 3.7   |
| Matthews et al.<br>(2005)        | USA            | Propionate                           | 200              | ns                                     | 0.0   | 2.6   |
|                                  |                |                                      | 200 <sup>4</sup> | ns                                     | 2.5   | -3.4  |
| Amoikon et al. (2006)            | USA            | Picolinate                           | 200 <sup>4</sup> | ns                                     | -5.6  | 0.0   |
|                                  |                |                                      | 200 <sup>4</sup> | ns                                     | -2.3  | 0.0   |
| Khajarerern et al.<br>(2006)     | Thailand       | Bisglycinate-nicotinamide<br>chelate | 200              | ns                                     | -0.1  | 0.3   |
|                                  |                |                                      | 400              | ns                                     | 1.1   | 1.4   |
| Bergstrom et al.<br>(2008)       | USA            | Propionate                           | 200              | ns                                     | 1.0   | 1.2   |
|                                  |                | Picolinate                           | 5,000            | ns                                     | 6.0   | 0.6   |
| Lindemann et al.<br>(2008)       | USA            | Propionate                           | 5,000            | ns                                     | 5.8   | 2.3   |
|                                  |                | Methionine                           | 5,000            | ns                                     | 0.3   | -2.9  |
|                                  |                | Yeast                                | 5,000            | ADG                                    | 8.6   | 0.6   |
| Wang et al. (2008)               | China          | Picolinate                           | 200              | ADG                                    | 9.8   | 4.8   |
|                                  |                |                                      | 200 <sup>4</sup> | ns                                     | -0.8  | 1.5   |
| Jackson et al. (2009)            | USA            | Propionate                           | 200 <sup>4</sup> | ns                                     | -2.8  | -5.1  |
|                                  |                |                                      | 200 <sup>4</sup> | ns                                     | 6.2   | 1.4   |
|                                  |                | CrCl <sub>3</sub>                    | 200              | ns                                     | 3.1   | 2.0   |
| Park et al. (2009)               | South<br>Korea | Picolinate                           | 200              | ADG, G:F                               | 7.8   | 6.2   |
|                                  |                | Methionine                           | 100              | ADG, G:F                               | 4.7   | 3.2   |
|                                  |                |                                      | 200              | ADG, G:F                               | 6.3   | 6.2   |
|                                  |                | CrCl <sub>3</sub>                    | 200              | ns                                     | -0.3  | -2.5  |
| Wang et al. (2009)               | China          | Picolinate                           | 200              | ns                                     | 2.3   | -2.0  |
|                                  |                | Nano CrCl <sub>3</sub>               | 200              | ns                                     | 6.4   | 4.8   |
|                                  |                | CrCl <sub>3</sub>                    | 200              | ns                                     | -0.3  | 0.9   |
| Wang et al. (2009)               | China          | Nano Cr                              | 200              | ADG, G:F                               | 6.3   | 9.5   |
|                                  |                |                                      | 300              | ADG <sup>2</sup> ,<br>G:F <sup>2</sup> | 4.1   | -1.7  |
| Li et al. (2013)                 | China          | Methionine                           | 600              |                                        | 16.0  | -3.6  |
|                                  |                |                                      | 900              |                                        | 20.5  | -4.6  |
| Panaite et al. (2013)            | Romania        | Picolinate                           | 200              | ns                                     | -9.0  | -3.3  |
|                                  |                |                                      | 400              | ADG, G:F                               | -21.1 | -10.3 |
| Hung et al. (2014)               | Australia      | Nano<br>Picolinate                   | 400              | ADG <sup>3</sup>                       | 5.3   | -0.4  |
|                                  |                | Sulfate                              | 200              | ns                                     | -0.9  | 0.4   |
| Peres et al. (2014)              | Brazil         | Methionine                           | 200              | ADG, G:F                               | 5.3   | 7.3   |
|                                  |                |                                      | 100              |                                        | 1.3   | 3.4   |
| Wang et al. (2014)               | China          | Cr chitosan<br>nanoparticles         | 200              | G:F <sup>2</sup>                       | -0.1  | 4.1   |
|                                  |                |                                      | 400              |                                        | -0.5  | 3.4   |
|                                  |                |                                      | 100              |                                        | 2.9   | -1.2  |
| Tian et al. (2015)               | China          | Methionine                           | 200              | ns <sup>2</sup>                        | 4.3   | 0.3   |
|                                  |                |                                      | 400              |                                        | 1.4   | -1.5  |
|                                  |                |                                      | 800              |                                        | 1.4   | 0.0   |

|                                |        |                        |                  |                           |      |      |
|--------------------------------|--------|------------------------|------------------|---------------------------|------|------|
| Li et al. (2017)               | Taiwan | CrCl <sub>3</sub>      | 200              | ns                        | 13.6 | 0.0  |
|                                |        | Picolinate             | 200              | ns                        | 13.6 | 3.6  |
|                                |        | Nano CrCl <sub>3</sub> | 200              | ns                        | 10.6 | 0.0  |
|                                |        | Nano picolinate        | 200              | ADG                       | 21.2 | 3.6  |
| Marcolla et al. (2017)         | Brazil | Yeast                  | 400 <sup>4</sup> | ns                        | -4.0 | -3.9 |
|                                |        |                        | 400 <sup>4</sup> | ns                        | -4.0 | 0.0  |
| Xu et al. (2017)               | China  | Methionine             | 200              | ns                        | 1.4  | 4.4  |
| Jin et al. (2018)              | China  | Methionine             | 200 <sup>4</sup> | ns                        | -3.7 | -1.0 |
|                                |        |                        | 200 <sup>4</sup> | ns                        | -0.9 | 5.1  |
| Gebhardt et al. (2019), Exp. 1 | USA    | Propionate             | 200              | ns                        | 0.6  | -1.3 |
| Gebhardt et al. (2019), Exp. 2 | USA    | Propionate             | 200 <sup>4</sup> | ns                        | 0.0  | 2.8  |
|                                |        |                        | 200 <sup>4</sup> | ns                        | 0.0  | 0.0  |
|                                |        |                        | 200 <sup>4</sup> | ns                        | 2.3  | 0.0  |
| Gebhardt et al. (2019), Exp. 1 | USA    | Propionate             | 100              | G:F <sup>2</sup>          | 1.1  | 2.5  |
|                                |        |                        | 200              |                           | 0.0  | 0.0  |
|                                |        |                        | 100/200          | ns                        | 1.1  | 0.0  |
|                                |        |                        | 200/100          | ns                        | 0.0  | 0.0  |
| Gebhardt et al. (2019), Exp. 2 | USA    | Propionate             | 200/100          | ns                        | 1.1  | 0.0  |
|                                |        |                        | 200              | ADG                       | 2.2  | 0.0  |
| Lien and Lan (2019)            | Taiwan | Picolinate             | 200              | ns                        | 11.3 | 1.1  |
|                                |        | Nano picolinate        | 200              | ns                        | 7.6  | -3.7 |
| Mayorga et al. (2019)          | USA    | Propionate             | 200              | ns                        | 3.4  | 4.0  |
| da Silva et al. (2021)         | Brazil | Yeast                  | 800              | ns                        | 2.0  | 7.1  |
|                                |        | Picolinate             | 480              | ns                        | -4.9 | 7.5  |
| Santos et al. (2021)           | USA    | Propionate             | 200 <sup>4</sup> | ADG <sup>3</sup> ,<br>G:F | -1.0 | -2.3 |
|                                |        |                        | 200 <sup>4</sup> | ADG <sup>3</sup> ,<br>G:F | -3.2 | -2.9 |
|                                |        |                        | 200 <sup>4</sup> | ADG <sup>3</sup> ,<br>G:F | -3.2 | -2.9 |
| Alencar et al. (2022)          | Brazil | Yeast                  | 800 <sup>4</sup> | ns                        | -3.9 | -1.9 |
|                                |        |                        | 800 <sup>4</sup> | ns                        | 2.0  | -1.5 |

<sup>1</sup>Significant level at  $P \leq 0.05$ . Difference is calculated as [(treatment value – control value) / control value] \* 100%.

<sup>2</sup>Polynomial contrasts were used for statistical analysis.

<sup>3</sup>Significant level at  $0.05 < P \leq 0.10$ .

<sup>4</sup>For experiments using factorial treatment structures, if the interaction of factors of either interested variable was observed the effect of the feed additive within each level of the other factor is included within the database.

<sup>5</sup>The comparison was the result of Cr fed in grow-finish phase and bottom comparison was the result of Cr fed in finish phase.

### 2.2.2. Carcass Characteristics - Cr

Back-fat significantly increased ( $P \leq 0.05$ ) in 2 comparisons (average of 8.0%), tended to

increase ( $0.05 < P \leq 0.10$ ) in 5 comparisons (average of 6.3%), significantly decreased ( $P \leq 0.05$ )

in 22 comparisons (average of 14.4%), and tended to decrease ( $0.05 < P \leq 0.10$ ) in 7 comparisons (average of 12.4%) compared to control pigs (Table S16). The greatest proportion of the comparisons found no evidence of difference ( $P > 0.10$ ) in BF (97 comparisons). Of these, BF was numerically increased ( $P > 0.10$ ) in 42 comparisons (average of 4.2%) and numerically decreased ( $P > 0.10$ ) in 53 comparisons (average of 6.4%) compared to control pigs. Percentage lean significantly increased ( $P \leq 0.05$ ) in 20 comparisons (average of 6.6%), tended to increase ( $0.05 < P \leq 0.10$ ) in 1 comparison (5.0%), and significantly decreased ( $P \leq 0.05$ ) in 2 comparisons (average of 4.1%) compared to control pigs. The greatest proportion of the comparisons found no evidence of difference ( $P > 0.10$ ) in percentage lean (82 comparisons). Of these, percentage lean was numerically increased ( $P > 0.10$ ) in 43 comparisons (average of 1.9%) and numerically decreased ( $P > 0.10$ ) in 36 comparisons (average of 1.2%) compared to control pigs. Loin muscle area/depth significantly increased ( $P \leq 0.05$ ) in 23 comparisons (average of 13.9%) and significantly decreased ( $P \leq 0.05$ ) in 1 comparison (11.6%) compared to control pigs. The greatest proportion of the comparisons found no evidence of difference ( $P > 0.10$ ) in LMA/LD (101 comparisons). Of these, LMA/LD was numerically increased ( $P > 0.10$ ) in 61 comparisons (average of 3.2%) and numerically decreased ( $P > 0.10$ ) in 38 comparisons (average of 3.0%) compared to control pigs. According to the database, Cr decreased BF, and increased percentage lean, and LMA/LD of grow-finish pigs in more than 60% of the comparisons, and the effects were observed across all inclusion levels (25 to 5,000  $\mu\text{g/kg}$ ). Additionally,

increasing the Cr level improved the carcass characteristics linearly within the 50 to 400 µg/kg inclusion (approximately 80% of all comparisons). Different Cr sources may not have the same effect on carcass characteristics. Contrary to the overall effects, Cr nicotinate increased BF by 2.2% (13 comparisons), and CrCl<sub>3</sub> decreased LMA/LD by 2.2% (6 comparisons). The meta-analysis conducted by Sales and Jančík [202] also found Cr reduced ( $P < 0.001$ ) 10th rib BF and increased ( $P < 0.001$ ) percentage lean and LMA.

**Table S16.** Studies on the effects of dietary chromium on carcass characteristics.

| Author                        | Country | Source            | Inclusion,<br>µg/kg | Sig. <sup>1</sup>                                                                              | Difference, % <sup>1</sup> |       |                     |            |
|-------------------------------|---------|-------------------|---------------------|------------------------------------------------------------------------------------------------|----------------------------|-------|---------------------|------------|
|                               |         |                   |                     |                                                                                                | Yield                      | BF    | percent<br>age lean | LMA/L<br>D |
| Page et al. (1993),<br>Exp. 1 | USA     | Picolinate        | 25                  | ns <sup>2</sup>                                                                                | n/a                        | -14.5 | 3.4                 | 2.9        |
|                               |         |                   | 50                  |                                                                                                | n/a                        | -17.7 | 3.0                 | 1.1        |
|                               |         |                   | 100                 |                                                                                                | n/a                        | -6.0  | 1.9                 | -2.0       |
|                               |         |                   | 200                 |                                                                                                | n/a                        | -13.8 | 2.6                 | 6.6        |
| Page et al. (1993),<br>Exp. 2 | USA     | Picolinate        | 100                 | Yield <sup>2,3</sup> , BF <sup>2</sup> ,<br>percentage<br>lean <sup>2</sup> , LMA <sup>2</sup> | 0.8                        | -25.7 | 8.5                 | 18.8       |
|                               |         |                   | 200                 |                                                                                                | 2.3                        | -16.5 | 5.8                 | 17.4       |
|                               |         |                   | 400                 |                                                                                                | 3.3                        | -30.2 | 11.0                | 22.6       |
|                               |         |                   | 800                 |                                                                                                | 3.2                        | -21.9 | 8.7                 | 18.5       |
| Page et al. (1993),<br>Exp. 3 | USA     | CrCl <sub>3</sub> | 200 <sup>4</sup>    | ns                                                                                             | 0.0                        | -5.5  | 0.0                 | -1.0       |
|                               |         |                   | 200 <sup>4</sup>    | ns                                                                                             | -1.1                       | 5.4   | -1.9                | -3.5       |
|                               |         | Picolinate        | 100 and<br>200      | BF,<br>percentage<br>lean, LMA                                                                 | 0.1                        | -19.7 | 5.6                 | 21.4       |
|                               |         |                   |                     |                                                                                                |                            |       |                     |            |
| Smith et al. (1994)           | USA     | Nicotinate        | 200                 | BF                                                                                             | n/a                        | -8.8  | 4.1                 | 3.3        |
| Lindemann et al.<br>(1995)    | USA     | Picolinate        | 250                 | ns <sup>2</sup>                                                                                | n/a                        | 2.4   | n/a                 | 3.3        |
|                               |         |                   | 500                 |                                                                                                | n/a                        | 9.0   | n/a                 | 3.8        |
| Lindemann et al.<br>(1995)    | USA     | Picolinate        | 200 <sup>4</sup>    | BF,<br>percentage<br>lean, LMA                                                                 | n/a                        | -17.3 | 8.9                 | 15.9       |
|                               |         |                   | 200 <sup>4</sup>    | BF,<br>percentage<br>lean, LMA                                                                 | n/a                        | -10.3 | 4.7                 | 6.6        |
| Lindemann et al.<br>(1995)    | USA     | Picolinate        | 100                 | BF <sup>2</sup> ,<br>percentage<br>lean <sup>2</sup> , LMA <sup>2</sup>                        | n/a                        | -5.5  | 1.8                 | 3.3        |
|                               |         |                   | 500                 |                                                                                                | n/a                        | 12.7  | -7.4                | -11.6      |
|                               |         |                   | 1,000               |                                                                                                | n/a                        | -13.9 | 5.8                 | 5.3        |
| Mooney and<br>Cromwell (1995) | USA     | Picolinate        | 200                 | ns                                                                                             | n/a                        | -0.5  | n/a                 | -2.3       |
|                               |         |                   | 200 <sup>5</sup>    | ns                                                                                             | 0.1                        | 7.6   | -0.5                | 1.7        |
| Boleman et al. (1995)         | USA     | Picolinate        | 200 <sup>5</sup>    | percentage<br>lean <sup>3</sup>                                                                | 0.1                        | -8.9  | 5.0                 | 7.3        |
| Smith et al. (1996)           | USA     | Nicotinate        | 200                 | ns                                                                                             | 0.0                        | 2.1   | 0.5                 | -1.1       |
| Kornegay et al.<br>(1997)     | USA     | Picolinate        | 200                 | ns                                                                                             | -0.4                       | 3.9   | 0.0                 | 6.8        |
| Mooney and<br>Cromwell (1997) | USA     | Picolinate        | 200                 | LMA <sup>3</sup>                                                                               | -0.5                       | 0.3   | 2.1                 | 6.3        |
|                               |         | CrCl <sub>3</sub> | 5000                | LMA <sup>3</sup>                                                                               | -0.4                       | -3.0  | 1.9                 | 6.2        |
| Ward et al. (1997)            | USA     | Picolinate        | 400 <sup>4</sup>    | ns                                                                                             | 0.5                        | -6.5  | -0.2                | -1.3       |

|                                                |             |                  |                  |                                |      |       |      |      |
|------------------------------------------------|-------------|------------------|------------------|--------------------------------|------|-------|------|------|
|                                                |             |                  | 400 <sup>4</sup> | ns                             | -0.4 | 0.0   | -0.2 | -4.3 |
|                                                |             |                  | 400 <sup>4</sup> | ns                             | -0.4 | 3.8   | 0.0  | 2.2  |
|                                                |             |                  | 400 <sup>4</sup> | ns                             | 0.1  | 15.0  | -1.4 | 0.0  |
| Min et al. (1997)                              | South Korea | Picolinate       | 100              | ns                             | 0.3  | -4.9  | n/a  | 1.8  |
|                                                |             |                  | 200              | ns                             | 0.4  | -15.9 | n/a  | 6.6  |
|                                                |             |                  | 400              | ns                             | -0.3 | -11.4 | n/a  | 3.1  |
| Lien et al. (1998)                             | Taiwan      | Picolinate       | 200              | BF, LMA                        | n/a  | -9.4  | n/a  | 12.1 |
|                                                |             |                  | 50               |                                | 0.2  | 2.0   | -1.3 | -1.3 |
| O'Quinn et al. (1998),<br>Exp.1 (barrow)       | USA         | Nicotinate       | 100              | ns <sup>2</sup>                | -1.2 | 8.1   | -2.3 | -5.7 |
|                                                |             |                  | 200              |                                | 0.0  | 2.0   | -0.4 | -4.9 |
|                                                |             |                  | 400              |                                | 0.9  | -1.0  | 0.2  | 0.6  |
|                                                |             |                  | 50               |                                | 0.0  | 5.5   | -2.0 | -3.9 |
| O'Quinn et al. (1998),<br>Exp. 1 (gilt)        | USA         | Nicotinate       | 100              | Yield <sup>2</sup>             | 0.9  | 6.6   | -1.2 | 1.9  |
|                                                |             |                  | 200              |                                | 1.5  | 6.6   | -1.6 | -2.5 |
|                                                |             |                  | 400              |                                | 0.3  | 4.4   | 1.1  | 2.7  |
| O'Quinn et al. (1998),<br>Exp. 2 <sup>12</sup> | USA         | Picolinate       | 200              | ns                             | 0.0  | 3.8   | -1.1 | -1.9 |
| Hanczakowska et al.<br>(1999)                  | Poland      | Yeast<br>(0.03%) |                  | ns                             | n/a  | 1.4   | -0.3 | 2.0  |
|                                                |             | Picolinate       | 200 <sup>4</sup> | ns                             | n/a  | -1.8  | 1.9  | 4.9  |
|                                                |             |                  | 200 <sup>4</sup> | ns                             | n/a  | 4.7   | -2.5 | -5.1 |
| Mooney and<br>Cromwell (1999),<br>Exp. 1       | USA         | Picolinate       | 200              | ns                             | 0.2  | -0.3  | 0.9  | 5.4  |
| Mooney and<br>Cromwell (1999),<br>Exp. 2       | USA         | Picolinate       | 200              | ns                             | -0.2 | 3.8   | -1.6 | -1.8 |
| O'Quinn et al. (1999)                          | USA         | Nicotinate       | 50 <sup>4</sup>  | ns                             | 0.7  | -0.5  | 0.1  | 2.3  |
|                                                |             |                  | 50 <sup>4</sup>  | ns                             | -0.7 | 1.0   | 0.5  | 2.6  |
|                                                |             |                  | 200              | Yield <sup>3</sup>             | -1.6 | 5.0   | n/a  | n/a  |
| Lemme et al. (1999)                            | USA         | Yeast            | 400              | ns                             | 0.2  | -1.1  | n/a  | n/a  |
|                                                |             |                  | 800              | ns                             | 0.6  | 3.9   | n/a  | n/a  |
| Matthews et al.<br>(2001), Exp. 1              | USA         | Picolinate       | 200              | ns                             | 0.4  | -7.7  | -2.8 | 0.7  |
|                                                |             | Propionate       | 200              | ns                             | -0.3 | -7.7  | -0.6 | 6.1  |
|                                                |             |                  |                  | BF,<br>percentage<br>lean, LMA |      |       |      |      |
| Xi et al. (2001)                               | USA         | Picolinate       | 200              |                                | 1.2  | -10.9 | 7.6  | 15.6 |
| Matthews et al.<br>(2003)                      | USA         | Propionate       | 200              | ns                             | -0.2 | 0.6   | -1.8 | -1.0 |
| Shelton et al. (2003),<br>Exp. 1               | USA         | Propionate       | 50               | ns <sup>2</sup>                | 0.3  | -3.5  | 2.4  | 3.8  |
|                                                |             |                  | 100              |                                | 0.1  | 2.0   | -1.4 | 0.7  |

|                                  |                |                                          |                  |                                                            |      |       |      |      |
|----------------------------------|----------------|------------------------------------------|------------------|------------------------------------------------------------|------|-------|------|------|
|                                  |                |                                          | 200              |                                                            | 0.1  | -2.3  | 3.0  | 9.9  |
|                                  |                |                                          | 200 <sup>4</sup> | ns                                                         | 0.1  | -2.3  | 3.0  | 9.9  |
|                                  |                |                                          | 200 <sup>4</sup> | ns                                                         | -1.5 | -4.9  | 0.7  | -6.1 |
| Shelton et al. (2003),<br>Exp. 2 | USA            | Propionate                               | 100              | ns <sup>2</sup>                                            | -0.1 | 7.8   | -2.4 | -2.6 |
|                                  |                |                                          | 200              |                                                            | -0.2 | 3.7   | 0.1  | 2.3  |
|                                  |                |                                          | 300              |                                                            | 0.2  | 1.8   | 0.1  | 1.7  |
| Waylan et al. (2003)             | USA            | Nicotinate                               | 50               | ns                                                         | 0.0  | 0.2   | 0.3  | 2.5  |
| Wang and Xu (2004)               | China          | Nano Cr                                  | 200              | BF,<br>percentage<br>lean, LMA                             | 1.2  | -18.2 | 14.1 | 20.0 |
| Matthews et al.<br>(2005)        | USA            | Propionate                               | 200              | ns                                                         | -0.4 | 10.2  | -0.6 | -4.3 |
| Amoikon et al. (2006)            | USA            | Picolinate                               | 200 <sup>4</sup> | ns                                                         | -1.9 | -2.3  | -0.5 | -0.9 |
|                                  |                |                                          | 200 <sup>4</sup> | ns                                                         | -0.8 | 7.2   | -3.5 | -7.0 |
|                                  |                |                                          | 200 <sup>4</sup> | ns                                                         | 1.9  | -0.3  | 0.5  | -1.1 |
| Khajarerern et al.<br>(2006)     | Thailand       | Bisglycinate-<br>nicotinamide<br>chelate | 200              | Yield <sup>2</sup> , BF <sup>2</sup> ,<br>LMA <sup>2</sup> | 0.0  | -4.5  | 2.2  | 5.9  |
|                                  |                |                                          | 400              |                                                            | 0.9  | -7.3  | 3.1  | 7.3  |
| Bergstrom et al.<br>(2008)       | USA            | Propionate                               | 200              | ns                                                         | 0.7  | 1.4   | -0.7 | -3.3 |
| Wang et al. (2008)               | China          | Picolinate                               | 200              | LMA                                                        | 2.7  | -10.3 | n/a  | 17.3 |
| Lindemann et al.<br>(2008)       | USA            | Tripicolinate                            | 5,000            | ns                                                         | 0.6  | -7.3  | n/a  | 2.0  |
|                                  |                | Propionate                               | 5,000            | ns                                                         | 1.1  | -16.0 | n/a  | 0.2  |
|                                  |                | Methionine                               | 5,000            | ns                                                         | 0.9  | -3.8  | n/a  | -2.6 |
|                                  |                | Yeast                                    | 5,000            | ns                                                         | 0.3  | -10.3 | n/a  | 1.3  |
|                                  |                |                                          | 200 <sup>4</sup> | BF <sup>3</sup>                                            | 0.5  | -6.3  | 2.6  | 6.1  |
| Jackson et al. (2009)            | USA            | Propionate                               | 200 <sup>4</sup> | BF <sup>3</sup>                                            | 0.2  | -9.1  | -2.4 | 3.1  |
|                                  |                |                                          | 200 <sup>4</sup> | BF <sup>3</sup>                                            | 1.1  | 1.6   | -1.5 | 3.2  |
|                                  |                |                                          | 200 <sup>4</sup> | BF <sup>3</sup>                                            | 1.1  | 1.6   | -1.5 | 3.2  |
| Park et al. (2009)               | South<br>Korea | CrCl <sub>3</sub>                        | 200              | ns                                                         | -1.4 | -12.6 | 1.6  | -5.6 |
|                                  |                | Picolinate                               | 200              | ns                                                         | 0.9  | -13.7 | 3.2  | 1.6  |
|                                  |                |                                          | 100              | ns                                                         | 1.2  | -15.5 | 3.1  | 2.1  |
|                                  |                | Methionine                               | 200              | BF,<br>percentage<br>lean                                  | 0.7  | -31.4 | 8.8  | 2.5  |
|                                  |                |                                          | 200              | ns                                                         | 1.3  | -2.7  | 3.5  | -5.4 |
| Wang et al. (2009)               | China          | Picolinate                               | 200              | LMA                                                        | 3.1  | -10.3 | 1.7  | 17.3 |
|                                  |                |                                          | 200              | BF,<br>percentage<br>lean, LMA                             | 1.5  | -24.3 | 10.6 | 20.2 |
|                                  |                | Nano CrCl <sub>3</sub>                   | 200              | BF,<br>percentage<br>lean, LMA                             | 1.5  | -24.3 | 10.6 | 20.2 |
| Panaite et al. (2013)            | Romania        | Picolinate                               | 200              | ns                                                         | n/a  | -3.9  | 0.9  | n/a  |

|                                |           |                        |                  |                                                                   |      |       |      |      |
|--------------------------------|-----------|------------------------|------------------|-------------------------------------------------------------------|------|-------|------|------|
|                                |           |                        | 400              | ns                                                                | n/a  | -16.5 | 2.9  | n/a  |
| Li et al. (2013)               | China     | Methionine             | 300              | BF <sup>2,3</sup> , LMA <sup>2</sup>                              | -1.0 | -15.4 | 3.4  | 7.2  |
|                                |           |                        | 600              |                                                                   | 0.3  | -19.1 | 7.2  | 13.2 |
|                                |           |                        | 900              |                                                                   | -0.1 | -22.8 | 7.3  | 13.1 |
|                                |           |                        |                  |                                                                   |      |       |      |      |
| Hung et al. (2014)             | Australia | Nano Tripicolinate     | 400              | ns                                                                | 0.0  | 0.0   | n/a  | n/a  |
| Peres et al. (2014)            | Brazil    | Cr sulfate             | 200              | ns                                                                | -0.4 | -0.6  | n/a  | -0.4 |
|                                |           | Methionine             | 200              | ns                                                                | -0.4 | -3.8  | n/a  | 0.1  |
| Wang et al. (2014)             | China     | Chitosan nanoparticles | 100              | BF <sup>2</sup> , percentage lean <sup>2</sup> , LMA <sup>2</sup> | 1.1  | -5.2  | 3.2  | 13.5 |
|                                |           |                        | 200              |                                                                   | 1.1  | -8.1  | 3.7  | 15.8 |
|                                |           |                        | 400              |                                                                   | 1.0  | -7.6  | 3.2  | 11.5 |
| Tian et al. (2015)             | China     | Methionine             | 100              | BF <sup>2,3</sup>                                                 | -1.5 | 7.4   | -0.8 | -1.4 |
|                                |           |                        | 200              |                                                                   | -1.2 | 14.5  | 1.9  | 16.3 |
|                                |           |                        | 400              |                                                                   | -0.8 | -10.9 | 3.8  | 6.1  |
|                                |           |                        | 800              |                                                                   | -0.5 | -3.3  | 2.1  | 6.8  |
| Li et al. (2017)               | Taiwan    | CrCl <sub>3</sub>      | 200              | ns                                                                | 1.2  | -0.4  | n/a  | -3.7 |
|                                |           | Picolinate             | 200              | BF                                                                | 1.2  | -9.6  | n/a  | -3.7 |
|                                |           | Nano CrCl <sub>3</sub> | 200              | ns                                                                | 0.9  | -0.9  | n/a  | -3.3 |
|                                |           | Nano Picolinate        | 200              | BF                                                                | 0.9  | -9.6  | n/a  | 0.2  |
| Marcolla et al. (2017)         | Brazil    | Yeast                  | 400 <sup>4</sup> | ns                                                                | -0.1 | -24.5 | n/a  | -0.3 |
|                                |           |                        | 400 <sup>4</sup> | ns                                                                | -0.3 | 10.2  | n/a  | -6.4 |
| Xu et al. (2017)               | China     | Methionine             | 200              | ns                                                                | 1.1  | -5.2  | n/a  | 2.1  |
| Jin et al. (2018)              | China     | Methionine             | 200 <sup>4</sup> | Yield                                                             | 3.2  | 11.9  | n/a  | n/a  |
|                                |           |                        | 200 <sup>4</sup> | ns                                                                | 0.9  | -8.2  | n/a  | n/a  |
| Mayorga et al. (2019)          | USA       | Propionate             | 200              | ns                                                                | n/a  | -0.8  | n/a  | 0.4  |
| Gebhardt et al. (2019), Exp. 1 | USA       | Propionate             |                  | BF, percentage lean                                               |      |       |      |      |
|                                |           |                        | 200 <sup>4</sup> |                                                                   | 0.6  | 3.3   | -0.8 | -1.0 |
|                                |           |                        |                  |                                                                   |      |       |      |      |
| Gebhardt et al. (2019), Exp. 2 | USA       | Propionate             | 200 <sup>4</sup> | ns                                                                | -0.3 | 0.8   | -0.1 | 0.0  |
|                                |           |                        | 200 <sup>4</sup> | ns                                                                | 0.3  | 0.7   | -0.1 | 0.1  |
|                                |           |                        | 200 <sup>4</sup> | ns                                                                | -0.5 | 1.5   | -0.5 | -1.9 |
| Gebhardt et al. (2019), Exp. 1 | USA       | Propionate             | 100              | ns <sup>2</sup>                                                   | 0.1  | 0.3   | 0.1  | 1.3  |
|                                |           |                        | 200              |                                                                   | -0.5 | -0.4  | 0.2  | 0.8  |
|                                |           |                        | 100/200          | ns                                                                | -0.1 | 0.6   | 0.1  | 1.2  |
|                                |           |                        | 200/100          | ns                                                                | -0.3 | -0.2  | 0.2  | 1.3  |
| Gebhardt et al. (2019), Exp. 2 | USA       | Propionate             | 200/100          | ns                                                                | 0.0  | -2.2  | 0.6  | 1.2  |
|                                |           |                        | 200/200          | Yield                                                             | -0.4 | 1.1   | -0.2 | 0.5  |
| Lien and Lan (2019)            | Taiwan    | Picolinate             | 200              | ns                                                                | -1.5 | -9.7  | -0.7 | 0.0  |
|                                |           | Nano Picolinate        | 200              | ns                                                                | -0.6 | -11.1 | -1.4 | 4.5  |

|                        |        |            |                  |                 |      |       |      |      |
|------------------------|--------|------------|------------------|-----------------|------|-------|------|------|
| da Silva et al. (2021) | Brazil | Yeast      | 800              | percentage lean | n/a  | 0.7   | 5.9  | 3.2  |
|                        |        | Picolinate | 480              | percentage lean | n/a  | -12.8 | 7.9  | 1.7  |
| Santos et al. (2021)   | USA    | Propionate | 200 <sup>4</sup> | BF <sup>3</sup> | 0.4  | 6.1   | -0.7 | 1.5  |
|                        |        |            | 200 <sup>4</sup> | BF <sup>3</sup> | -0.3 | 1.9   | -0.6 | -1.4 |
| Alencar et al. (2022)  | Brazil | Yeast      | 800 <sup>4</sup> | ns              | 1.2  | -1.4  | -0.4 | -2.5 |
|                        |        |            | 800 <sup>4</sup> | ns              | -1.0 | -1.5  | 0.2  | -1.9 |

<sup>1</sup>Significant level at  $P \leq 0.05$ . Difference is calculated as [(treatment value – control value) / control value] \* 100%.

<sup>2</sup>Polynomial contrasts were used for statistical analysis.

<sup>3</sup>Significant level at  $0.05 < P \leq 0.10$ .

<sup>4</sup>For experiments using factorial treatment structures, if the interaction of factors of either interested variable was observed the effect of the feed additive within each level of the other factor is included within the database.

<sup>5</sup>The 2 experimental diets with Cr were fed in grow-finish and finish phase respectively.

### 2.3. Conjugated Linoleic Acid (CLA)

There were 46 research articles for CLA with 73 comparisons from 15 countries during the grow-finish or finishing period with added dietary levels of 0.07 to 2.72%. Of these, 55 comparisons reported growth performance data, and 65 comparisons reported carcass data.

#### 2.3.1. Growth Performance - CLA

Average daily gain significantly increased ( $P \leq 0.05$ ) in 5 comparisons (average of 7.2%), tended to increase ( $0.05 < P \leq 0.10$ ) in 1 comparison (3.6%), and significantly decreased ( $P \leq 0.05$ ) in 3 comparisons (average of 7.8%) compared to control pigs (Table S17). The greatest proportion of the comparisons found no evidence of difference ( $P > 0.10$ ) in ADG (53 comparisons). Of these, ADG was numerically increased ( $P > 0.10$ ) in 34 comparisons (average of 3.7%) and numerically decreased ( $P > 0.10$ ) in 17 comparisons (average of 4.1%) compared to control pigs. Feed efficiency significantly increased ( $P \leq 0.05$ ) in 13 comparisons (average of 4.5%), tended to increase ( $0.05 < P \leq 0.10$ ) in 6 comparisons (average of 8.8%), and significantly decreased ( $P \leq 0.05$ ) in 1 comparison (2.8%) compared to control pigs. The greatest proportion of the comparisons found no evidence of difference ( $P > 0.10$ ) in G:F (37 comparisons). Of these, G:F was numerically increased ( $P > 0.10$ ) in 24 comparisons (average of 4.6%) and numerically decreased ( $P > 0.10$ ) in 9 comparisons (average of 2.3%) compared to control pigs. Overall, the results suggest that CLA had positive effects on ADG and G:F (65 and 75% of all the comparisons); however, the effects of CLA were often not significant enough to statistically

improve ( $P < 0.10$ ) ADG (10% of all the comparisons). On the other hand, CLA improved ( $P < 0.10$ ) G:F in 33% of all the comparisons. Increasing CLA concentrations did not increasingly improve the ADG and G:F response. Contrary to what is concluded herein, in a meta-analysis by Wang et al. [245] found no evidence of difference ( $P > 0.05$ ) in ADG, ADFI, and G:F when pigs were fed CLA or linseed supplementation; however, only seven research articles were included in their meta-analysis. Different basal diets may affect the response to CLA on ADG and G:F. Diets with wheat as the main ingredient (18 comparisons) had a greater percentage of improvement in ADG (3.7%) and G:F (5.4%) compared to diets with corn as the main ingredient [ADG decreased 0.1% (32 comparisons) and G:F increased 2.8% (28 comparisons)].

**Table S17.** Studies on the effects of dietary CLA on growth performance.

| Author                           | Country     | Inclusion, %      | Sig. <sup>1</sup> | Difference, % <sup>1</sup> |      |
|----------------------------------|-------------|-------------------|-------------------|----------------------------|------|
|                                  |             |                   |                   | ADG                        | G:F  |
| Dugan et al. (1997)              | Canada      | 1.00              | G:F <sup>3</sup>  | 0.0                        | 6.2  |
| Ostrowska et al. (1999)          | Australia   | 0.07              | ns <sup>2</sup>   | 10.2                       | 5.8  |
|                                  |             | 0.14              |                   | 6.3                        | 6.7  |
|                                  |             | 0.28              |                   | 8.4                        | 8.8  |
|                                  |             | 0.41              |                   | 1.4                        | 3.0  |
|                                  |             | 0.55              |                   | 2.8                        | 6.7  |
| O'Quinn et al. (2000)            | USA         | 0.30              | ns                | -5.8                       | 0.0  |
| Bee (2001)                       | Switzerland | 1.20              | ns                | 7.5                        | 6.8  |
| Eggert et al. (2001)             | USA         | 0.60              | ADG               | -10.2                      | -7.4 |
| Dugan et al. (2001)              | Canada      | 0.16 <sup>4</sup> | ns                | 1.5                        | 4.0  |
|                                  |             | 0.33 <sup>4</sup> | ns                | 4.0                        | 2.1  |
|                                  |             | 0.16 <sup>4</sup> | ns                | 5.0                        | 0.3  |
|                                  |             | 0.33 <sup>4</sup> | ns                | 0.7                        | 2.0  |
|                                  |             | 0.07              | ns                | -1.3                       | 4.3  |
| Thiel-Cooper et al. (2001)       | USA         | 0.15              | ns                | 1.2                        | 6.0  |
|                                  |             | 0.30              | ns                | 3.4                        | 5.1  |
|                                  |             | 0.60              | ADG, G:F          | 8.2                        | 9.1  |
| Wiegand et al. (2001)            | USA         | 0.75              | G:F               | 1.9                        | 6.1  |
| Barowicz et al. (2002)           | Poland      | 1.20              | ns                | 4.3                        | 10.5 |
|                                  |             | 1.20              | ns                | 1.2                        | 0.8  |
| Dunshea et al. (2002),<br>Exp. 1 | Australia   | 0.22              | ns                | 1.4                        | 4.1  |
| Dunshea et al. (2002),<br>Exp. 2 | Australia   | 0.22              | ns                | -1.4                       | -0.7 |
| Tischendorf et al. (2002)        | Germany     | 1.08              | ns                | 2.0                        | 0.3  |
| Wiegand et al. (2002)            | USA         | 0.75 <sup>5</sup> | G:F <sup>2</sup>  | 0.5                        | 2.7  |

|                                |             |                   |                                     |       |      |
|--------------------------------|-------------|-------------------|-------------------------------------|-------|------|
|                                |             | 0.75 <sup>5</sup> |                                     | 1.9   | 3.3  |
|                                |             | 0.75 <sup>5</sup> |                                     | -1.3  | 1.2  |
| Ostrowska et al. (2003)        | Australia   | 0.07              | G:F <sup>2,3</sup>                  | 6.1   | 6.7  |
|                                |             | 0.14              |                                     | 5.8   | 10.0 |
|                                |             | 0.28              |                                     | 6.8   | 16.7 |
|                                |             | 0.41              |                                     | -0.1  | 3.3  |
|                                |             | 0.55              |                                     | -2.0  | 10.0 |
| Sun et al. (2004)              | China       | 1.36              | ADG <sup>2</sup> , G:F <sup>2</sup> | 7.7   | 3.9  |
|                                |             | 2.72              |                                     | 14.1  | 5.2  |
| Barowicz et al. (2005)         | Poland      | 1.20              | ns                                  | 1.2   | n/a  |
| Lauridsen et al. (2005)        | Denmark     | 0.30              | ADG <sup>3</sup> , G:F              | 3.6   | 4.8  |
| Weber et al. (2006)            | USA         | 0.60              | G:F                                 | 3.4   | 4.0  |
| Bee et al. (2008)              | Switzerland | 0.60              | ns                                  | 2.5   | 0.0  |
| Corino et al. (2008)           | Italy       | 0.38              | ns                                  | 2.2   | n/a  |
| Martin et al. (2008)           | Spain       | 0.56              | ns                                  | 5.1   | 5.9  |
|                                |             | 1.12              | ns                                  | 5.7   | 5.9  |
| White et al. (2009)            | USA         | 0.60              | ns                                  | 5.4   | -1.4 |
| Jiang et al. (2010)            | China       | 1.00              | ADG <sup>2</sup>                    | -7.9  | 0.0  |
|                                |             | 2.00              |                                     | -5.3  | -1.6 |
| Han et al. (2011)              | China       | 0.36              | ns <sup>2</sup>                     | -6.6  | n/a  |
|                                |             | 0.71              |                                     | -14.5 | n/a  |
|                                |             | 1.09              |                                     | -9.2  | n/a  |
| Lee et al. (2011)              | South Korea | 0.59              | ns                                  | 3.7   | 12.5 |
| Barnes et al. (2012)           | USA         | 0.60              | G:F                                 | -3.2  | -2.8 |
| Go et al. (2012)               | USA         | 0.80              | ns                                  | -3.2  | -2.7 |
| Martinez-Aispuro et al. (2012) | Mexico      | 1.2/0.5/0.2       | ns                                  | -9.4  | -2.0 |
| Rickard et al. (2012)          | USA         | 0.36              | G:F                                 | 1.6   | 5.8  |
| Pompeu et al. (2013)           | USA         | 0.60 <sup>4</sup> | ADG, G:F                            | 1.6   | 2.2  |
|                                |             | 0.60 <sup>4</sup> | ADG, G:F                            | 4.4   | 2.3  |
| Tous et al. (2013)             | Spain       | 2.51              | ns                                  | 0.0   | -2.5 |
| Martínez-Aispuro et al. (2014) | Mexico      | 0.60              | ns                                  | -1.9  | -2.2 |
| Wang et al. (2015)             | China       | 0.60              | ns                                  | 1.2   | 0.0  |
| Marcolla et al. (2017)         | Brazil      | 0.28 <sup>4</sup> | ns                                  | 5.0   | 3.9  |
|                                |             | 0.28 <sup>4</sup> | G:F                                 | 4.9   | 8.1  |
| Upadhaya et al. (2017)         | South Korea | 0.28              | ns                                  | -0.5  | 1.2  |
|                                |             | 0.56              | ns                                  | -0.8  | -0.3 |
| Panisson et al. (2020)         | Brazil      | 0.18              | ns                                  | -3.4  | 2.0  |
|                                |             | 0.36              | ns                                  | -5.5  | 2.0  |

<sup>1</sup>Significant level at  $P \leq 0.05$ . Difference is calculated as [(treatment value – control value) / control value] \* 100%.

<sup>2</sup>Polynomial contrasts were used for statistical analysis.

<sup>3</sup>Significant level at  $0.05 < P \leq 0.10$ .

<sup>4</sup>For experiments using factorial treatment structures, if the interaction of factors of either interested variable was observed the effect of the feed additive within each level of the other factor is included within the database.

<sup>5</sup>CLA was fed in the 3 treatment diets during the last 29, 56, or 87 kg of BW gain before slaughter respectively.

### 2.3.2. Carcass Characteristics - CLA

Back-fat significantly decreased ( $P \leq 0.05$ ) in 22 comparisons (average of 15.4%) and tended to decrease ( $0.05 < P \leq 0.10$ ) in 5 comparisons (average of 6.5%) compared to control pigs (Table S18). Approximately half of the studies found no evidence of difference ( $P > 0.10$ ) in BF (32 comparisons). Of these, BF was numerically increased ( $P > 0.10$ ) in 14 comparisons (average of 4.0%) and numerically decreased ( $P > 0.10$ ) in 16 comparisons (average of 6.1%) compared to control pigs. Percentage lean significantly increased ( $P \leq 0.05$ ) in 14 comparisons (average of 4.9%) compared to control pigs. The greatest proportion of the comparisons found no evidence of difference ( $P > 0.10$ ) in percentage lean (23 comparisons). Of these, percentage lean was numerically increased ( $P > 0.10$ ) in 16 comparisons (average of 1.9%) and numerically decreased ( $P > 0.10$ ) in 7 comparisons (average of 0.6%) compared to control pigs. Loin muscle area/depth significantly increased ( $P \leq 0.05$ ) in 6 comparisons (average of 7.6%), tended to increase ( $0.05 < P \leq 0.10$ ) in 1 comparison (3.7%), significantly decreased ( $P \leq 0.05$ ) in 1 comparison (5.9%), and tended to decrease ( $0.05 < P \leq 0.10$ ) in 1 comparison (4.8%) compared to control pigs. The greatest proportion of the comparisons found no evidence of difference ( $P > 0.10$ ) in LMA/LD (29 comparisons). Of these, LMA/LD was numerically increased ( $P > 0.10$ ) in 14 comparisons (average of 3.0%) and numerically decreased ( $P > 0.10$ ) in 15 comparisons (average of 3.0%) compared to control pigs. The results showed that CLA had significant effects on decreasing BF (73% of all the comparisons and all the significant comparisons) and increasing percentage lean (81% of all the comparisons and all the significant comparisons) of

grow-finish pigs. Increasing CLA concentrations did not increasingly improve the carcass characteristics. Moreover, different basal diets may affect the response to CLA on BF and percentage lean. Diets with wheat as the main ingredient had a bigger percentage of reduction in BF (13.8%; 9 comparisons) and an improvement in percentage lean (3.7%; 11 comparisons) compared to diets with corn as the main ingredient [BF decrease 7.4% (37 comparisons) and percentage lean increased 2.3% (16 comparisons)]. These results suggest that CLA has the potential to reduce BF and increase percentage lean more consistently compared to other feed additives considered in this review.

**Table S18.** Studies on the effects of dietary CLA on carcass characteristics.

| Author                        | Country     | Inclusion, %      | Sig. <sup>1</sup>                                                 | Difference, % <sup>1</sup> |       |                 |        |
|-------------------------------|-------------|-------------------|-------------------------------------------------------------------|----------------------------|-------|-----------------|--------|
|                               |             |                   |                                                                   | Yield                      | BF    | percentage lean | LMA/LD |
| Dugan et al. (1997)           | Canada      | 1.00              | percentage lean                                                   | n/a                        | n/a   | 2.3             | n/a    |
| Ostrowska et al. (1999)       | Australia   | 0.07              | percentage lean <sup>2</sup>                                      | n/a                        | n/a   | 0.7             | n/a    |
|                               |             | 0.14              |                                                                   | n/a                        | n/a   | 6.0             | n/a    |
|                               |             | 0.28              |                                                                   | n/a                        | n/a   | 7.2             | n/a    |
|                               |             | 0.41              |                                                                   | n/a                        | n/a   | 5.4             | n/a    |
|                               |             | 0.55              |                                                                   | n/a                        | n/a   | 9.1             | n/a    |
| O'Quinn et al. (2000)         | USA         | 0.30              | ns                                                                | -1.4                       | -5.2  | 0.4             | -4.1   |
| Bee (2001)                    | Switzerland | 1.20              | BF                                                                | n/a                        | -20.7 | -0.4            | 1.4    |
| Dugan et al. (2001)           | Canada      | 0.16 <sup>4</sup> | percentage lean                                                   | n/a                        | n/a   | 6.0             | n/a    |
|                               |             | 0.33 <sup>4</sup> | percentage lean                                                   | n/a                        | n/a   | 4.4             | n/a    |
|                               |             | 0.16 <sup>4</sup> | ns                                                                | n/a                        | n/a   | -0.3            | n/a    |
|                               |             | 0.33 <sup>4</sup> | ns                                                                | n/a                        | n/a   | 1.8             | n/a    |
| Eggert et al. (2001)          | USA         | 0.60              | ns                                                                | -0.1                       | -8.2  | n/a             | -2.0   |
| Thiel-Cooper et al. (2001)    | USA         | 0.07              | BF                                                                | n/a                        | -18.2 | n/a             | 6.4    |
|                               |             | 0.15              | BF                                                                | n/a                        | -18.2 | n/a             | 2.0    |
|                               |             | 0.30              | ns                                                                | n/a                        | -8.7  | n/a             | -2.8   |
|                               |             | 0.60              | ns                                                                | n/a                        | -10.1 | n/a             | -4.7   |
| Wiegand et al. (2001)         | USA         | 0.75              | BF                                                                | n/a                        | -7.0  | n/a             | 4.9    |
| Averette Gatlin et al. (2002) | USA         | 0.60              | ns                                                                | n/a                        | -2.6  | -0.4            | -2.9   |
| Barowicz et al. (2002)        | Poland      | 1.20              | ns                                                                | -0.9                       | 18.0  | 5.4             | n/a    |
|                               |             | 1.20              | ns                                                                | -0.1                       | -5.3  | 1.2             | n/a    |
| Dunshea et al. (2002), Exp 1  | Australia   | 0.22              | BF                                                                | 0.2                        | -8.0  | n/a             | n/a    |
| Dunshea et al. (2002), Exp 2  | Australia   | 0.22              | ns                                                                | 0.7                        | 1.0   | n/a             | n/a    |
| Tischendorf et al. (2002)     | Germany     | 1.08              | percentage lean                                                   | -0.4                       | -7.4  | 2.6             | n/a    |
| Wiegand et al. (2002)         | USA         | 0.75 <sup>5</sup> | BF <sup>2</sup> , percentage lean <sup>2</sup> , LMA <sup>2</sup> | n/a                        | -14.5 | 5.0             | 6.6    |
|                               |             | 0.75 <sup>5</sup> |                                                                   | n/a                        | -14.5 | 6.4             | 11.0   |
|                               |             | 0.75 <sup>5</sup> |                                                                   | n/a                        | -20.6 | 7.4             | 9.2    |
| Corino et al. (2003)          | Italy       | 0.16              | BF <sup>3</sup>                                                   | 0.0                        | -12.8 | n/a             | n/a    |
|                               |             | 0.33              | BF <sup>3</sup>                                                   | -0.1                       | -8.9  | n/a             | n/a    |
| Ostrowska et al. (2003)       | Australia   | 0.07              | ns <sup>2</sup>                                                   | -1.3                       | n/a   | n/a             | n/a    |
|                               |             | 0.14              |                                                                   | -0.6                       | n/a   | n/a             | n/a    |
|                               |             | 0.28              |                                                                   | -0.3                       | n/a   | n/a             | n/a    |
|                               |             | 0.41              |                                                                   | 0.1                        | n/a   | n/a             | n/a    |

|                                |                |                   |                                                        |      |       |      |      |
|--------------------------------|----------------|-------------------|--------------------------------------------------------|------|-------|------|------|
|                                |                | 0.55              |                                                        | -2.3 | n/a   | n/a  | n/a  |
| Sun et al. (2004)              | China          | 1.36              | BF <sup>2</sup> , LMA <sup>2</sup>                     | n/a  | -8.6  | n/a  | 4.6  |
|                                |                | 2.72              |                                                        | n/a  | -10.4 | n/a  | 5.7  |
| Barowicz et al. (2005)         | Poland         | 1.20              | BF, LMA                                                | -1.0 | -9.5  | 3.0  | 8.5  |
| Corino et al. (2005)           | Italy          | 0.38              | ns                                                     | -1.7 | 1.8   | n/a  | n/a  |
| Lauridsen et al. (2005)        | Denmark        | 0.30              | ns                                                     | n/a  | 0.4   | 0.4  | 1.2  |
|                                |                | 0.07              |                                                        | -1.3 | -7.1  | n/a  | n/a  |
|                                |                | 0.14              |                                                        | -0.6 | -17.8 | n/a  | n/a  |
| Ostrowska et al. (2005)        | Australia      | 0.28              | BF <sup>2</sup>                                        | -0.3 | -17.4 | n/a  | n/a  |
|                                |                | 0.41              |                                                        | 0.1  | -19.1 | n/a  | n/a  |
|                                |                | 0.55              |                                                        | -2.3 | -23.7 | n/a  | n/a  |
| Rossi et al. (2005)            | Italy          | 0.38              | ns                                                     | 0.2  | n/a   | 0.4  | n/a  |
| Weber et al. (2006)            | USA            | 0.60              | BF <sup>3</sup> , percentage lean,<br>LMA <sup>3</sup> | -0.6 | -7.0  | 1.8  | 3.7  |
| Bee et al. (2008)              | Switzerland    | 0.60              | BF                                                     | n/a  | -11.0 | 0.9  | n/a  |
| Corino et al. (2008)           | Italy          | 0.38              | ns                                                     | -0.8 | 0.4   | -0.4 | -3.7 |
|                                |                | 0.56              | ns                                                     | -0.5 | 0.0   | n/a  | n/a  |
| Martin et al. (2008)           | Spain          | 1.12              | ns                                                     | -0.2 | 5.2   | n/a  | n/a  |
| Cechova et al. (2009)          | Czech Republic | 1.20              | ns                                                     | n/a  | 1.2   | n/a  | -2.6 |
| Larsen et al. (2009)           | USA            | 0.45              | ns                                                     | n/a  | -6.1  | n/a  | 4.4  |
| White et al. (2009)            | USA            | 0.60              | ns                                                     | n/a  | 3.6   | 2.4  | -0.4 |
| Cechova et al. (2010)          | Czech Republic | 1.20              | ns                                                     | n/a  | n/a   | -0.6 | n/a  |
| Cordero et al. (2010)          | Spain          | 0.60              | ns                                                     | -0.9 | -2.7  | n/a  | n/a  |
|                                |                | 0.30              |                                                        | -1.5 | n/a   | n/a  | n/a  |
| Cordero et al. (2010)          | Spain          | 0.60              | ns <sup>2</sup>                                        | -0.8 | n/a   | n/a  | n/a  |
|                                |                | 1.20              |                                                        | 0.1  | n/a   | n/a  | n/a  |
| Jiang et al. (2010)            | China          | 1.00              | BF, percentage lean                                    | -0.2 | -26.8 | 4.7  | 9.3  |
|                                |                | 2.00              | BF                                                     | -0.5 | -8.5  | 3.5  | -2.0 |
|                                |                | 0.36              |                                                        | 3.0  | n/a   | n/a  | n/a  |
| Han et al. (2011)              | China          | 0.71              | Yield <sup>2,3</sup>                                   | 3.7  | n/a   | n/a  | n/a  |
|                                |                | 1.09              |                                                        | 2.3  | n/a   | n/a  | n/a  |
| Lee et al. (2011)              | South Korea    | 0.59              | ns                                                     | -1.9 | -2.7  | n/a  | n/a  |
| Barnes et al. (2012)           | USA            | 0.60              | BF, LMA                                                | n/a  | -16.0 | 1.8  | -5.9 |
| Go et al. (2012)               | USA            | 0.80              | ns                                                     | 0.5  | -1.5  | n/a  | -0.5 |
| Martinez-Aispuro et al. (2012) | Mexico         | --                | ns                                                     | n/a  | 1.6   | -1.8 | -7.5 |
| Rickard et al. (2012)          | USA            | 0.36              | BF, LMA                                                | n/a  | -12.7 | n/a  | -4.8 |
| Pompeu et al. (2013)           | USA            | 0.60 <sup>4</sup> | Yield, BF <sup>3</sup>                                 | -1.0 | -3.0  | 0.9  | 2.4  |

|                                |              |                   |                        |      |       |      |      |
|--------------------------------|--------------|-------------------|------------------------|------|-------|------|------|
|                                |              | 0.60 <sup>4</sup> | Yield, BF <sup>3</sup> | -0.6 | -0.9  | 0.2  | 0.1  |
| Tous et al. (2013)             | Spain        | 2.51              | ns                     | -0.6 | -11.6 | 5.0  | 0.8  |
|                                |              | 0.15              | ns                     | n/a  | -4.0  | n/a  | n/a  |
| Bothma et al. (2014)           | South Africa | 0.30              | ns                     | n/a  | -1.0  | n/a  | n/a  |
|                                |              | 0.60              | ns                     | n/a  | -14.0 | n/a  | n/a  |
| Martínez-Aispuro et al. (2014) | Mexico       | 0.60              | ns                     | n/a  | -5.8  | -0.3 | -4.3 |
| Wang et al. (2015)             | China        | 0.60              | ns                     | 3.1  | 0.0   | n/a  | 5.2  |
| Marcolla et al. (2017)         | Brazil       | 0.28 <sup>4</sup> | BF                     | 0.0  | -27.5 | n/a  | 2.0  |
|                                |              | 0.28 <sup>4</sup> | ns                     | -0.2 | 5.8   | n/a  | -4.2 |
| Upadhaya et al. (2017)         | South Korea  | 0.28              | ns                     | n/a  | -2.3  | 1.0  | 0.9  |
|                                |              | 0.56              | ns                     | n/a  | -6.4  | 1.8  | 0.9  |
| Panisson et al. (2020)         | Brazil       | 0.18              | ns                     | n/a  | 4.8   | n/a  | -0.3 |
|                                |              | 0.36              | ns                     | n/a  | 5.2   | n/a  | -3.6 |

<sup>1</sup>Significant level at  $P \leq 0.05$ . Difference is calculated as [(treatment value – control value) / control value] \* 100%.

<sup>2</sup>Polynomial contrasts were used for statistical analysis.

<sup>3</sup>Significant level at  $0.05 < P \leq 0.10$ .

<sup>4</sup>For experiments using factorial treatment structures, if the interaction of factors of either interested variable was observed the effect of the feed additive within each level of the other factor is included within the database.

<sup>5</sup>CLA was fed in the 3 treatment diets during the last 29, 56, or 87 kg of BW gain before slaughter respectively.

## 2.4. *L-carnitine*

There were 12 research articles for L-carnitine with 29 comparisons from 4 countries during the grow-finish or finishing period with added dietary levels of 25 to 250 mg/kg, with most studies feeding 50 mg/kg. Of these, 24 comparisons reported growth performance data, and 22 comparisons reported carcass data.

### 2.4.1. *Growth Performance – L-carnitine*

Average daily gain significantly increased ( $P \leq 0.05$ ) in 2 comparisons (average of 3.3%), tended to increase ( $0.05 < P \leq 0.10$ ) in 4 comparisons (average of 3.1%), and significantly decreased ( $P \leq 0.05$ ) in 1 comparison (4.8%) compared to control pigs (Table S19). The greatest proportion of the comparisons found no evidence of difference ( $P > 0.10$ ) in ADG (17 comparisons). Of these, ADG was numerically increased ( $P > 0.10$ ) in 13 comparisons (average of 3.4%) and numerically decreased ( $P > 0.10$ ) in 3 comparisons (average of 2.6%) compared to control pigs. Feed efficiency significantly increased ( $P \leq 0.05$ ) in 1 comparison (2.9%) and tended to increase ( $0.05 < P \leq 0.10$ ) in 3 comparisons (average of 3.7%) compared to control pigs. The greatest proportion of the comparisons found no evidence of difference ( $P > 0.10$ ) in G:F (20 comparisons). Of these, G:F was numerically increased ( $P > 0.10$ ) in 13 comparisons (average of 4.4%) and numerically decreased ( $P > 0.10$ ) in 5 comparisons (average of 2%) compared to control pigs. Overall, the results suggest that L-carnitine has the potential to improve ADG and G:F (79 and 71% of all the comparisons) with relatively large improvement.

Moreover, the beneficial effects of L-carnitine were significant ( $P < 0.10$ ) for ADG and G:F in 25 and 23% of all the comparisons, respectively. There were not enough data to support whether different inclusion levels or types of basal diets affected the response to L-carnitine for ADG and G:F. However, results might suggest that pigs fed L-carnitine were more likely to have improved ADG and G:F when fed in diets without DDGS [290-292], but further research is needed to confirm this. Additionally, environmental factors, such as temperature, humidity, and stress level, may affect L-carnitine response [293] due to the change in feed intake and physiological status.

**Table S19.** Studies on the effects of dietary L-carnitine on growth performance.

| Authors                     | Country     | Inclusion,<br>mg/kg | Sig. <sup>1</sup>  | Difference, % <sup>1</sup> |      |
|-----------------------------|-------------|---------------------|--------------------|----------------------------|------|
|                             |             |                     |                    | ADG                        | G:F  |
| Owen et al. (2001)          | USA         | 50                  | ns <sup>2</sup>    | 2.2                        | -3.1 |
|                             |             | 125                 |                    | -1.1                       | 0.0  |
| Owen et al. (2001)          | USA         | 25                  | ns <sup>2</sup>    | 3.3                        | 3.1  |
|                             |             | 50                  |                    | 2.2                        | 6.3  |
|                             |             | 75                  |                    | 3.3                        | 6.3  |
|                             |             | 100                 |                    | 6.5                        | 6.3  |
|                             |             | 125                 |                    | 2.2                        | 6.3  |
| Waylan et al. (2003)        | USA         | 50                  | ns                 | 0.8                        | 1.3  |
| Bertol et al. (2005)        | USA         | 150                 | ns                 | -4.7                       | -3.6 |
| Han and Thacker (2006)      | South Korea | 50                  | ns                 | 5.0                        | 7.1  |
| Chen et al. (2008)          | South Korea | 250                 | ns                 | 3.9                        | 3.1  |
| Pietruszka et al. (2009)    | Poland      | 100                 | ns                 | 1.4                        | 1.2  |
| James et al. (2013)         | USA         | 50                  | ns                 | 0.0                        | -0.4 |
| James et al. (2013), Exp. 1 | USA         | 25                  | ADG <sup>2</sup>   | -4.8                       | 0.0  |
|                             |             | 50                  |                    | 0.6                        | -1.6 |
| James et al. (2013), Exp. 2 | USA         | 25                  | G:F <sup>2,3</sup> | 2.3                        | 5.5  |
|                             |             | 50                  |                    | -1.9                       | 4.1  |
| James et al. (2013), Exp. 3 | USA         | 50                  | ns                 | 9.4                        | 7.7  |
| James et al. (2013), Exp. 4 | USA         | 50                  | ADG, G:F           | 6.0                        | 2.9  |
|                             |             | 50 <sup>4</sup>     |                    | 4.9                        | 3.5  |
| Ying et al. (2013)          | USA         | 100 <sup>4</sup>    | ADG <sup>2,3</sup> | 3.7                        | 0.6  |
|                             |             | 50 <sup>4</sup>     |                    | 2.4                        | -1.2 |
|                             |             | 100 <sup>4</sup>    | ADG <sup>2,3</sup> | 1.2                        | 4.2  |
| Meng et al. (2018)          | USA         | 50                  | G:F <sup>3</sup>   | 1.8                        | 1.5  |

<sup>1</sup>Significant level at  $P \leq 0.05$ . Difference is calculated as [(treatment value – control value) / control value] \* 100%.

<sup>2</sup>Polynomial contrasts were used for statistical analysis.

<sup>3</sup>Significant level at  $0.05 < P \leq 0.10$ .

<sup>4</sup>The basal diets were corn-SBM based in the top two comparisons. The basal diets were corn-DDGS-SBM based in the bottom two comparisons.

#### 2.4.2. Carcass Characteristics – L-carnitine

Back-fat significantly increased ( $P \leq 0.05$ ) in 3 comparisons (average of 4%), tended to increase ( $0.05 < P \leq 0.10$ ) in 2 comparisons (average of 1.4%), significantly decreased ( $P \leq 0.05$ ) in 2 comparisons (average of 12.5%), and tended to decrease ( $0.05 < P \leq 0.10$ ) in 7 comparisons (average of 4.8%) compared to control pigs (Table S20). Eight comparisons found no evidence of difference ( $P > 0.10$ ) in BF. Of these, BF was numerically increased ( $P > 0.10$ ) in 1 comparison (1.9%) and numerically decreased ( $P > 0.10$ ) in 6 comparisons (average of 5.7%) compared to control pigs. Percentage lean significantly increased ( $P \leq 0.05$ ) in 4 comparisons (average of 3.8%), tended to increase ( $0.05 < P \leq 0.10$ ) in 2 comparisons (average of 1.5%), and significantly decreased ( $P \leq 0.05$ ) in 3 comparisons (average of 1.3%) compared to control pigs. Half of the studies found no evidence of difference ( $P > 0.10$ ) in percentage lean (11 comparisons). Of these, percentage lean was numerically increased ( $P > 0.10$ ) in 7 comparisons (average of 1.5%) and numerically decreased ( $P > 0.10$ ) in 3 comparisons (average of 0.7%) compared to control pigs. Loin muscle area/depth significantly increased ( $P \leq 0.05$ ) in 1 comparison (6.3%) compared to control pigs. The greatest proportion of the comparisons found no evidence of difference ( $P > 0.10$ ) in LMA/LD (20 comparisons). Of these, LMA/LD was numerically increased ( $P > 0.10$ ) in 13 comparisons (average of 4.4%) and numerically decreased ( $P > 0.10$ ) in 6 comparisons (average of 2.3%) compared to control pigs. There were not enough data to support whether different inclusion levels or types of basal diets affected the response to L-

carnitine for carcass characteristics. Overall, the results suggest that L-carnitine is a potential feed additive that had relatively large positive effects on BF, percentage lean, and LMA/LD (68, 65, and 67% of all the comparisons) compared to other feed additives in this review, with 23, 30, and 5% of all the comparisons being significant ( $P < 0.10$ ), respectively.

**Table S20.** Studies on the effects of dietary L-carnitine on carcass characteristics.

| Authors                         | Country     | Inclusion,<br>mg/kg | Sig. <sup>1</sup>                                        | Difference, % <sup>1</sup> |       |                    |        |
|---------------------------------|-------------|---------------------|----------------------------------------------------------|----------------------------|-------|--------------------|--------|
|                                 |             |                     |                                                          | Yield                      | BF    | percentage<br>lean | LMA/LD |
| Owen et al. (2001)              | USA         | 50                  | BF <sup>2,3</sup> ,                                      | -1.3                       | -2.6  | 1.8                | 1.4    |
|                                 |             | 125                 | percentage<br>lean <sup>2</sup>                          | -1.2                       | -4.3  | 4.1                | 9.2    |
| Owen et al. (2001)              | USA         | 25                  | BF <sup>2,3</sup> ,<br>percentage<br>lean <sup>2</sup>   | 0.9                        | 0.6   | -2.6               | -6.4   |
|                                 |             | 50                  |                                                          | -0.4                       | -9.1  | 7.6                | 12.6   |
|                                 |             | 75                  |                                                          | -0.7                       | -5.0  | 1.9                | 0.2    |
|                                 |             | 100                 |                                                          | -0.1                       | -2.8  | -0.3               | -1.1   |
|                                 |             | 125                 |                                                          | 1.0                        | 2.2   | -0.9               | 0.6    |
| Waylan et al. (2003)            | USA         | 50                  | ns                                                       | 0.5                        | 1.9   | 0.1                | 2.2    |
| Bertol et al. (2005)            | USA         | 150                 | ns                                                       | n/a                        | -3.8  | n/a                | -2.2   |
| Han and Thacker (2006)          | South Korea | 50                  | ns                                                       | -0.1                       | -10.5 | 0.8                | n/a    |
| Chen et al. (2008)              | South Korea | 250                 | BF                                                       | n/a                        | -18.2 | 1.8                | 16.2   |
| Pietruszka et al. (2009)        | Poland      | 100                 | ns                                                       | 2.7                        | -7.4  | 1.4                | -3.4   |
| James et al. (2013), Exp.1      | USA         | 25                  | ns <sup>2</sup>                                          | -0.6                       | -3.1  | 2.2                | 1.8    |
|                                 |             | 50                  |                                                          | -0.7                       | -2.2  | 1.7                | 0.2    |
| James et al. (2013), Exp.2      | USA         | 25                  | BF <sup>2,3</sup> ,<br>percentage<br>lean <sup>2,3</sup> | 3.0                        | -2.0  | 1.2                | 7.5    |
|                                 |             | 50                  |                                                          | 0.6                        | -7.6  | 1.7                | 2.0    |
| James et al. (2013), Exp.3      | USA         | 50                  | LMA                                                      | n/a                        | -7.1  | 2.4                | 6.3    |
|                                 |             | 50 <sup>4</sup>     | Yield <sup>2,3</sup> , BF <sup>2</sup>                   | 1.6                        | 4.8   | -0.7               | 0.5    |
| Ying et al. (2013) <sup>7</sup> | USA         | 100 <sup>4</sup>    |                                                          | 0.4                        | 3.0   | -0.5               | -0.3   |
|                                 |             | 50 <sup>4</sup>     | Yield <sup>2,3</sup> , BF <sup>2</sup>                   | 0.3                        | 4.2   | -0.7               | -0.3   |
|                                 |             | 100 <sup>4</sup>    |                                                          | 0.1                        | 0.0   | 0.0                | 0.0    |
| Meng et al. (2018)              | USA         | 50                  | BF                                                       | -0.2                       | -6.7  | n/a                | 3.3    |

<sup>1</sup>Significant level at  $P \leq 0.05$ . Difference is calculated as [(treatment value – control value) / control value] \* 100%.

<sup>2</sup>Polynomial contrasts were used for statistical analysis.

<sup>3</sup>Significant level at  $0.05 < P \leq 0.10$ .

<sup>4</sup>The basal diets were corn-SBM based in the top two comparisons. The basal diets were corn-DDGS-SBM based in the bottom two comparisons.

### 3. Feed Additives – Enzymes

This section discusses dietary enzymes used as feed additives in classes of carbohydrases, proteases, phytases, and combination of different types of enzymes (multi-enzymes). There were 86 research articles for enzymes with 165 comparisons from 13 countries during the grow-finish or finishing period which met the requirements for inclusion. Of these, 163 comparisons reported growth performance data, and 107 comparisons reported carcass data. For phytases, its effect in low P diets has been well established, thus, only experiments that utilized diets at/above P requirement were included to discuss the other potential benefits of adding phytases.

#### 3.1. *Growth performance - Carbohydrases*

Average daily gain significantly increased ( $P \leq 0.05$ ) in 15 comparisons (average of 5.3%), tended to increase ( $0.05 < P \leq 0.10$ ) in 5 comparisons (average of 4%), and significantly decreased ( $P \leq 0.05$ ) in 4 comparisons (average of 2.7%) compared to control pigs (Table S21). The greatest proportion of the comparisons found no evidence of difference ( $P > 0.10$ ) in ADG (63 comparisons). Of these, ADG was numerically increased ( $P > 0.10$ ) in 35 comparisons (average of 2.9%) and numerically decreased ( $P > 0.10$ ) in 24 comparisons (average of 3.3%) compared to control pigs. Feed efficiency significantly increased ( $P \leq 0.05$ ) in 8 comparisons (average of 8.5%) and tended to increase ( $0.05 < P \leq 0.10$ ) in 2 comparisons (average of 5.9%) compared to control pigs. The greatest proportion of the comparisons found no evidence of

difference ( $P > 0.10$ ) in G:F (74 comparisons). Of these, G:F was numerically increased ( $P > 0.10$ ) in 46 comparisons (average of 2.9%) and numerically decreased ( $P > 0.10$ ) in 19 comparisons (average of 3.8%) compared to control pigs. Overall, the results suggest that carbohydrases had positive effects on ADG and G:F (63 and 67% of all the comparisons), but the magnitude was small, and most comparisons had no statistical differences. Additionally, in a meta-analysis conducted by Aranda-Aguirre et al. [302], the authors found that  $\beta$ -mannanase and xylanase had no effects ( $P > 0.10$ ) on growth performance of finishing pigs. However, in another meta-analysis by Kiarie et al. [303], the authors found  $\beta$ -mannanase improved ( $P < 0.0001$ ) ADG and G:F of grow-finish pigs. Dietary composition and differences in primary ingredients utilized may affect the effect of carbohydrases on ADG and G:F. Corn diets (32 comparisons) had 2.6% improvement in ADG and 2.2% increase in G:F; Barley diet had 0.4% improvement in ADG (23 comparisons) and 1.7% improvement in G:F (21 comparisons); and wheat diet had 0.9% decrease in ADG (16 comparisons) and 0.2% improvement in G:F (15 comparisons). Moreover, with the limited data, carbohydrases appeared to improve ADG and G:F in some trials with diets that were low in energy and/or AAs, which suggest carbohydrases may be beneficial for the economic efficiency in diets formulated below requirements. Moreover, carbohydrases showed no benefit or negative effects in diets with high level of DDGS (above 15%). Because the production of DDGS utilizes carbohydrases

during the fermentation stage to release the nutrients (starch), there may not be enough available substrates for dietary carbohydrases to be beneficial.

**Table S21.** Studies on the effects of enzymes on growth performance.

| Author                               | Country | Enzyme                     | Sig. <sup>1</sup>     | Difference, % <sup>1</sup> |      |
|--------------------------------------|---------|----------------------------|-----------------------|----------------------------|------|
|                                      |         |                            |                       | ADG                        | G:F  |
| Thacker et al. (1988)                | Canada  | Carbohydrases              | ns                    | 2.7                        | 0.6  |
| Thacker et al. (1992)                | Canada  | Carbohydrases <sup>5</sup> | ns                    | 1.2                        | 1.6  |
|                                      |         |                            | ns                    | -8.1                       | -3.7 |
| Baas and Thacker (1996)              | Canada  | Carbohydrases <sup>a</sup> | ns                    | 0.0                        | 2.4  |
|                                      |         | Carbohydrases <sup>b</sup> | ns                    | -3.5                       | 2.9  |
|                                      |         | Carbohydrases <sup>c</sup> | ns                    | -1.2                       | 1.6  |
|                                      |         | Carbohydrases <sup>d</sup> | ns                    | -3.5                       | 0.8  |
| Kim et al. (1998)                    | USA     | Carbohydrases              | ns                    | 3.2                        | -0.4 |
| Flis et al. (1998)                   | Poland  | Carbohydrases <sup>5</sup> | ns                    | 3.1                        | 3.3  |
|                                      |         |                            | ns                    | 4.4                        | 4.7  |
| O'Doherty and Forde (1999)           | Ireland | Carbohydrases              | ns                    | -2.6                       | 0.3  |
| Thacker and Campbell (1999)          | Canada  | Carbohydrases <sup>5</sup> | ns                    | 0.0                        | 0.0  |
|                                      |         |                            | ns                    | -2.1                       | 2.4  |
| Mavromichalis et al. (2000), Exp. 1  | USA     | Carbohydrases              | ns                    | -1.7                       | 3.5  |
| Mavromichalis et al. (2000), Exp. 2  | USA     | Carbohydrases              | ns                    | 2.2                        | 0.0  |
| Grandhi (2001)                       | Canada  | Carbohydrases              | G:F                   | 1.2                        | 4.2  |
| Petty et al. (2002)                  | USA     | Carbohydrases              | ADG, G:F <sup>3</sup> | 3.6                        | 4.2  |
| Park et al. (2003), Exp. 1           | USA     | Carbohydrases              | ns                    | 2.2                        | 2.7  |
|                                      |         |                            |                       | 4.4                        | 2.8  |
| Park et al. (2003), Exp. 2           | USA     | Carbohydrases <sup>4</sup> | ADG <sup>2,3</sup>    | 3.3                        | 2.8  |
|                                      |         |                            |                       | 6.7                        | 5.6  |
|                                      |         |                            |                       | 0.0                        | 0.0  |
| Park et al. (2003), Exp. 3           | USA     | Carbohydrases <sup>4</sup> | ns <sup>2</sup>       | 1.1                        | 3.1  |
|                                      |         |                            |                       | 1.1                        | 0.0  |
|                                      |         |                            |                       | 2.2                        | 5.9  |
| Park et al. (2003)                   | USA     | Carbohydrases <sup>5</sup> | ns                    | -5.4                       | -4.7 |
|                                      |         |                            | ns                    | -5.8                       | -5.4 |
|                                      |         |                            | ns                    | 1.6                        | 1.0  |
|                                      |         |                            | ns                    | -2.9                       | -0.5 |
|                                      |         |                            | ns                    | 2.6                        | 3.2  |
| Flis and Sobotka (2005)              | Poland  | Carbohydrases              | ns                    | 2.6                        | 3.2  |
| Thacker (2005), Exp. 1               | Canada  | Carbohydrases              | ns                    | 0.0                        | 1.1  |
| Thacker (2005), Exp. 2               | Canada  | Carbohydrases              | ns                    | -1.9                       | 0.0  |
|                                      |         |                            | ns                    | 3.9                        | 3.1  |
| Thacker and Rossnagel (2005)         | Canada  | Carbohydrases <sup>5</sup> | ns                    | -1.9                       | -3.7 |
|                                      |         |                            | ns                    | -1.9                       | 0.0  |
|                                      |         |                            | ns                    | 1.9                        | 1.6  |
| Thacker and Rossnagel (2005)         | Canada  | Carbohydrases <sup>5</sup> | ns                    | 1.8                        | 2.9  |
|                                      |         |                            | ns                    | 1.8                        | 0.4  |
|                                      |         |                            | G:F <sup>3</sup>      | 14.8                       | 7.7  |
| Kim et al. (2006)                    | USA     | Carbohydrases <sup>6</sup> | G:F <sup>3</sup>      | 0.8                        | 0.0  |
| Roşu and Falcă (2007)                | Romania | Carbohydrases              | ns                    | 6.5                        | 9.4  |
| Świątkiewicz and Hanczakowska (2008) | Poland  | Carbohydrases <sup>5</sup> | ns                    | 1.7                        | n/a  |
|                                      |         |                            | ns                    | 4.6                        | n/a  |
| Wang et al. (2009)                   |         | Carbohydrases <sup>a</sup> | ADG, G:F              | 9.6                        | 14.3 |

|                                         |             |                           |                        |      |       |
|-----------------------------------------|-------------|---------------------------|------------------------|------|-------|
|                                         | South Korea | Carbohydases <sup>b</sup> | ADG, G:F               | 8.4  | 16.5  |
| Widyaratne et al. (2009)                | Canada      | Carbohydases <sup>5</sup> | ns                     | -2.9 | 2.8   |
| Jacela et al. (2010), Exp. 1            | USA         | Carbohydases              | ns                     | -1.1 | -9.7  |
| Jacela et al. (2010), Exp. 4            | USA         | Carbohydases              | ns                     | 0.5  | -0.6  |
|                                         |             |                           |                        | -1.0 | 0.0   |
| Yoon et al. (2010), Exp. 1 <sup>4</sup> | South Korea | Carbohydases              | ADG <sup>2</sup>       | 0.4  | 1.1   |
|                                         |             |                           |                        | 4.7  | 5.2   |
|                                         |             |                           |                        | 2.6  | 2.1   |
| Yoon et al. (2010), Exp. 2              | South Korea | Carbohydases <sup>5</sup> | ADG                    | 4.1  | 8.5   |
|                                         |             |                           | ADG                    | 2.5  | 1.5   |
|                                         |             |                           | ADG                    | -0.9 | 1.7   |
| Barnes et al. (2011)                    | USA         | Carbohydases <sup>5</sup> | ADG                    | -1.4 | -1.4  |
|                                         |             |                           | ADG                    | -1.3 | -1.0  |
|                                         |             |                           | ns                     | 1.5  | 1.9   |
| Hanczakowska et al. (2012)              | Poland      | Carbohydases <sup>4</sup> | ADG                    | 4.2  | 3.2   |
|                                         |             |                           | ADG, G:F               | 6.2  | 10.6  |
| Jo et al. (2012), Exp. 1                | South Korea | Carbohydases <sup>a</sup> | ns                     | 1.5  | 1.5   |
|                                         |             | Carbohydases <sup>b</sup> | ADG                    | 2.8  | 3.0   |
| McAlpine et al. (2012)                  | Ireland     | Carbohydases              | ADG                    | -7.2 | n/a   |
|                                         |             |                           |                        | 9.9  | 2.4   |
| Cho and Kim (2013)                      | South Korea | Carbohydases <sup>a</sup> | ns                     | 9.9  | 2.4   |
|                                         |             | Carbohydases <sup>b</sup> | ADG, G:F               | 14.7 | 11.9  |
|                                         |             | Carbohydases <sup>a</sup> | ns                     | 5.2  | -2.4  |
|                                         |             | Carbohydases <sup>b</sup> | ns                     | -6.6 | -12.3 |
| Kerr et al. (2013)                      | USA         | Carbohydases <sup>c</sup> | ns                     | -2.0 | -4.5  |
|                                         |             | Carbohydases <sup>d</sup> | ns                     | -9.3 | -9.3  |
|                                         |             | Carbohydases <sup>e</sup> | ns                     | -2.4 | -3.6  |
| Kim et al. (2013)                       | South Korea | Carbohydases <sup>a</sup> | ADG                    | 10.3 | 8.2   |
|                                         |             | Carbohydases <sup>b</sup> | ns                     | 3.8  | 1.9   |
| Lipiński et al. (2013)                  | Poland      | Carbohydases <sup>4</sup> | ADG                    | 2.6  | 2.1   |
|                                         |             |                           | ADG                    | 3.0  | 2.9   |
| O'Shea et al. (2014)                    | Ireland     | Carbohydases              | ns                     | -7.3 | -4.9  |
| Villca et al. (2016)                    | Switzerland | Carbohydases              | ns                     | 1.5  | 2.5   |
| Lindemann (2016)                        | USA         | Carbohydases              | ns                     | 1.0  | 2.3   |
| Nguyen et al. (2018)                    | South Korea | Carbohydases              | ADG <sup>3</sup> , G:F | 3.4  | 2.7   |
| Torres-Pitarch et al. (2018)            | Ireland     | Carbohydases              | ns                     | 0.3  | 0.0   |
| Smit et al. (2019)                      | Canada      | Carbohydases              | ADG <sup>3</sup>       | 2.0  | 2.4   |
| Jang et al. (2020)                      | South Korea | Carbohydases              | ns                     | 3.2  | 6.8   |
| Jang et al. (2020)                      | South Korea | Carbohydases              | ns                     | 1.7  | -0.3  |
|                                         |             |                           | G:F                    | 3.1  | 5.2   |
| Torres-Pitarch et al. (2020)            | Ireland     | Carbohydases <sup>5</sup> | G:F                    | -1.2 | 2.3   |
|                                         |             |                           | ns                     | -1.9 | 0.4   |
|                                         |             |                           | ns                     | 2.3  | -1.1  |
| Kpogo et al. (2021)                     | Canada      | Carbohydases              | ns                     | -0.9 | -2.6  |
| O'Doherty and Forde (1999)              | Ireland     | Proteases                 | ns                     | 0.5  | 2.4   |
| Thacker (2005), Exp. 2                  | Canada      | Proteases                 | ns                     | -3.9 | -0.4  |
|                                         |             |                           | ns                     | -8.2 | -4.3  |
| Reyna et al. (2006) <sup>4</sup>        | Mexico      | Proteases                 | ns                     | -4.2 | -4.3  |
|                                         |             |                           | ns                     | -1.5 | -2.0  |
| McAlpine et al. (2012)                  | Ireland     | Proteases                 | ADG                    | -5.4 | n/a   |
| O'Shea et al. (2014)                    | Ireland     | Proteases                 | ADG                    | -9.8 | 0.8   |

|                                |             |                            |                                          |      |      |
|--------------------------------|-------------|----------------------------|------------------------------------------|------|------|
| Stephenson et al. (2014)       | USA         | Proteases                  | ADG <sup>3</sup>                         | 1.7  | -0.7 |
| Upadhaya et al. (2016)         | South Korea | Proteases                  | G:F                                      | 3.2  | 2.6  |
| Choe et al. (2017)             | South Korea | Proteases                  | ADG, G:F                                 | 6.0  | 15.1 |
| Lei et al. (2017)              | South Korea | Proteases                  | G:F                                      | 2.2  | 6.5  |
| Nguyen et al. (2018)           | South Korea | Proteases <sup>a</sup>     | ns                                       | 2.4  | 2.9  |
|                                |             | Proteases <sup>b</sup>     | ns                                       | 1.7  | 2.1  |
| Figuerola et al. (2019)        | Mexico      | Proteases                  | ns                                       | 2.9  | -2.2 |
| Liu et al. (2019) <sup>4</sup> | South Korea | Proteases                  | ADG <sup>2,3</sup> ,<br>G:F <sup>2</sup> | 1.8  | 1.0  |
|                                |             |                            |                                          | 5.5  | 3.1  |
|                                |             |                            |                                          | 3.9  | 1.5  |
| Min et al. (2019)              | South Korea | Proteases                  | ADG                                      | 5.2  | 2.8  |
| Lee et al. (2020)              | South Korea | Proteases                  | G:F <sup>3</sup>                         | 4.3  | 7.6  |
| Kim et al. (2021)              | South Korea | Proteases <sup>a</sup>     | ns                                       | 1.3  | 0.0  |
|                                |             | Proteases <sup>b</sup>     | ADG, G:F                                 | 4.4  | 4.9  |
| Perez-Palencia et al. (2021)   | USA         | Proteases                  | ns                                       | -0.7 | -0.2 |
| Cromwell et al. (1993), Exp. 1 | USA         | Phytases                   | ns                                       | 4.6  | 6.0  |
| Cromwell et al. (1993), Exp. 2 | USA         | Phytases                   | ns                                       | 1.1  | -0.3 |
| Cromwell et al. (1995)         | USA         | Phytases                   | ns                                       | 1.6  | -2.1 |
| Helander and Partanen (1997)   | Finland     | Phytases                   | ns                                       | -1.7 | -4.5 |
| O'Doherty et al. (1999)        | Ireland     | Phytases <sup>4</sup>      | ns                                       | 1.3  | 0.0  |
|                                |             |                            | ns                                       | 1.8  | 2.0  |
| Gebert et al. (1999)           | Switzerland | Phytases                   | ADG, G:F                                 | 10.6 | 8.2  |
| Gagné et al. (2002)            | Canada      | Phytases                   | ns                                       | -4.6 | 1.9  |
| Brady et al. (2002)            | Ireland     | Phytases                   | ns                                       | 5.6  | 1.5  |
| Thacker and Rossnagel (2006)   | Canada      | Phytases                   | ns                                       | 2.5  | -3.2 |
| Thacker et al. (2006)          | Canada      | Phytases                   | ns                                       | 5.2  | 3.3  |
| Varley et al. (2010), Exp. 1   | Ireland     | Phytases                   | ns                                       | 4.2  | 1.6  |
| Varley et al. (2010), Exp. 2   | Ireland     | Phytases                   | ns                                       | -3.0 | 0.0  |
| Kerr et al. (2013)             | USA         | Phytases                   | ns                                       | -3.8 | -6.6 |
|                                |             | Phytases <sup>a</sup>      | ns                                       | -3.3 | 0.3  |
|                                |             | Phytases <sup>b</sup>      | ns                                       | -2.3 | -0.3 |
| Langbein et al. (2013)         | USA         | Phytases <sup>c</sup>      | ns                                       | -2.3 | -0.3 |
|                                |             |                            | ns                                       | 1.6  | 0.0  |
|                                |             |                            | ns                                       | 0.0  | 0.0  |
| Patience (2015)                | USA         | Phytases <sup>4</sup>      | ns                                       | 1.6  | 0.0  |
|                                |             |                            | ns                                       | 0.0  | 0.0  |
|                                |             |                            | ns                                       | 1.6  | 0.0  |
| Pérez Alvarado et al. (2015)   | Mexico      | Phytases <sup>a</sup>      | ns                                       | 0.0  | 6.9  |
|                                |             | Phytases <sup>b</sup>      | ns                                       | -3.0 | 2.3  |
| Lindemann (2016)               | USA         | Phytases <sup>4</sup>      | ADG <sup>2</sup> ,<br>G:F <sup>2,3</sup> | 7.5  | 2.9  |
|                                |             |                            |                                          | 8.8  | 5.0  |
|                                |             |                            |                                          | 5.5  | 5.9  |
| Holloway et al. (2019)         | USA         | Phytases <sup>4</sup>      | ns                                       | 1.5  | 0.9  |
|                                |             |                            | ns                                       | 0.1  | 1.2  |
|                                |             |                            | ns                                       | 1.3  | 1.2  |
| Dang and Kim (2021)            | South Korea | Phytases                   | ADG, G:F                                 | 5.7  | 3.3  |
| Dang and Kim (2021)            | South Korea | Phytases                   | ADG, G:F <sup>3</sup>                    | 4.1  | 2.9  |
| Baas and Thacker (1996)        | Canada      | Multi-enzymes              | ns                                       | -2.3 | 2.4  |
| Thacker (2005), Exp. 2         | Canada      | Multi-enzymes              | ns                                       | -2.9 | 0.4  |
| Domaćinović et al. (2006)      | Croatia     | Multi-enzymes <sup>5</sup> | ns                                       | 0.7  | 0.3  |

|                               |             |                            |                                     |      |      |
|-------------------------------|-------------|----------------------------|-------------------------------------|------|------|
|                               |             |                            | ns                                  | 1.6  | 1.3  |
| Feoli et al. (2008)           | USA         | Multi-enzymes              | ns                                  | -0.3 | -2.1 |
| Benz et al. (2009)            | USA         | Multi-enzymes              | ns                                  | 0.5  | 1.9  |
| Thacker (2009)                | Canada      | Multi-enzymes              | ns                                  | 5.7  | 2.8  |
| Thacker and Haq (2009)        | Canada      | Multi-enzymes              | ns                                  | -1.2 | 0.7  |
| Jacela et al. (2010), Exp. 2  | USA         | Multi-enzymes              | ns                                  | -0.1 | -0.8 |
| Jacela et al. (2010), Exp. 3  | USA         | Multi-enzymes <sup>a</sup> | ns                                  | 1.7  | 0.0  |
|                               |             | Multi-enzymes <sup>b</sup> | ns                                  | 0.1  | 0.0  |
| Ao et al. (2011)              | South Korea | Multi-enzymes <sup>4</sup> | ADG <sup>2</sup> , G:F <sup>2</sup> | 6.3  | 2.8  |
|                               |             |                            |                                     | 7.6  | 5.6  |
| Lee et al. (2011)             | South Korea | Multi-enzymes              | G:F                                 | 2.3  | 9.2  |
| Jo et al. (2012), Exp. 1      | South Korea | Multi-enzymes <sup>a</sup> | ADG                                 | 3.2  | 3.4  |
|                               |             | Multi-enzymes <sup>b</sup> | ADG, G:F                            | 5.0  | 4.9  |
| Jo et al. (2012), Exp. 2      | South Korea | Multi-enzymes              | ADG, G:F                            | 2.9  | 3.6  |
| Kerr et al. (2013)            | USA         | Multi-enzymes              | ns                                  | -1.6 | -6.6 |
|                               |             |                            | ns                                  | 8.3  | 0.8  |
|                               |             |                            | ADG, G:F                            | 24.9 | 11.2 |
|                               |             |                            | ns                                  | 0.8  | 3.8  |
| Sitanaka et al. (2018)        | Brazil      | Multi-enzymes              | ns                                  | 7.2  | 1.3  |
|                               |             |                            | ADG, G:F                            | 11.3 | 2.6  |
|                               |             |                            | ADG, G:F                            | 8.5  | 16.9 |
| Lawlor et al. (2019)          | Ireland     | Multi-enzymes              | ADG, G:F                            | 8.5  | 16.9 |
| Balasubramanian et al. (2020) | South Korea | Multi-enzymes              | ADG, G:F                            | 8.5  | 16.9 |
| Coelho et al. (2020)          | Portugal    | Multi-enzymes <sup>a</sup> | ns                                  | -6.5 | -5.5 |
|                               |             | Multi-enzymes <sup>b</sup> | ns                                  | -3.7 | -1.5 |
| Jerez-Bogota et al. (2020)    | USA         | Multi-enzymes <sup>5</sup> | G:F                                 | 0.0  | 30.8 |
|                               |             |                            | ADG                                 | 5.6  | 2.4  |
| Huang et al. (2021)           | China       | Multi-enzymes              | G:F                                 | 4.0  | 2.6  |

<sup>1</sup>Significant level at  $P \leq 0.05$ . Difference is calculated as [(treatment value – control value) / control value] \* 100%.

<sup>2</sup>Polynomial contrasts were used for statistical analysis.

<sup>3</sup>Significant level at  $0.05 < P \leq 0.10$ .

<sup>4</sup>Same enzyme of each experiment was used with different inclusion levels. The inclusion level of each comparison increases from top to bottom.

<sup>5</sup>For experiments using factorial treatment structures, if the interaction of factors of either interested variable

was observed the effect of the feed additive within each level of the other factor is included within the database.

<sup>6</sup>The top comparison was the result of barrow and the bottom comparison was the results of gilts.

<sup>a,b,c,d</sup> Enzyme compositions within an experiment with different superscripts differ.

### 3.2. Carcass Characteristics - Carbohydrases

Back-fat significantly increased ( $P \leq 0.05$ ) in 2 comparisons (average of 4.1%) and tended

to increase ( $0.05 < P \leq 0.10$ ) in 1 comparison (4.8%) compared to control pigs (Table S22). The

greatest proportion of the comparisons found no evidence of difference ( $P > 0.10$ ) in BF (54 comparisons). Of these, BF was numerically increased ( $P > 0.10$ ) in 18 comparisons (average of 4.0%) and numerically decreased ( $P > 0.10$ ) in 29 comparisons (average of 3.7%) compared to control pigs. Percentage lean significantly increased ( $P \leq 0.05$ ) in 1 comparison (5.6%) and significantly decreased ( $P \leq 0.05$ ) in 2 comparisons (average of 0.7%) compared to control pigs.

The greatest proportion of the comparisons found no evidence of difference ( $P > 0.10$ ) in percentage lean (52 comparisons). Of these, percentage lean was numerically increased ( $P > 0.10$ ) in 28 comparisons (average of 1.1%) and numerically decreased ( $P > 0.10$ ) in 20 comparisons (average of 0.8%) compared to control pigs. All studies found no evidence of difference ( $P > 0.10$ ) in LMA/LD (38 comparisons). Of these, LMA/LD was numerically increased ( $P > 0.10$ ) in 20 comparisons (average of 3.3%) and numerically decreased ( $P > 0.10$ ) in 17 comparisons (average of 1.5%) compared to control pigs.

**Table S22.** Studies on the effects of enzymes on carcass characteristics.

| Author                             | Country | Enzyme                     | Sig. <sup>1</sup> | Difference, % <sup>1</sup> |      |                 |        |
|------------------------------------|---------|----------------------------|-------------------|----------------------------|------|-----------------|--------|
|                                    |         |                            |                   | Yield                      | BF   | percentage lean | LMA/LD |
| Thacker et al. (1992)              | Canada  | Carbohydrazes <sup>5</sup> | ns                | 0.9                        | n/a  | -1.0            | n/a    |
|                                    |         |                            | ns                | -0.3                       | n/a  | -0.2            | n/a    |
| Kim et al. (1998)                  | USA     | Carbohydrazes              | ns                | 0.6                        | -3.1 | 0.9             | n/a    |
| O'Doherty and Forde (1999)         | Ireland | Carbohydrazes              | ns                | -0.6                       | 2.7  | -0.5            | 0.1    |
| Thacker and Campbell (1999)        | Canada  | Carbohydrazes <sup>5</sup> | ns                | 1.7                        | 0.5  | 0.2             | -0.7   |
|                                    |         |                            | ns                | -0.4                       | -1.4 | 0.0             | -2.7   |
| Mavromichalis et al. (2000), Exp.1 | USA     | Carbohydrazes              | ns                | 0.1                        | -2.2 | 0.2             | n/a    |
| Mavromichalis et al. (2000), Exp.2 | USA     | Carbohydrazes              | ns                | -0.1                       | -1.2 | 0.1             | n/a    |
| Grandhi (2001)                     | Canada  | Carbohydrazes              | ns                | 0.1                        | -0.7 | n/a             | n/a    |
| Petty et al. (2002)                | USA     | Carbohydrazes              | ns                | n/a                        | -4.9 | 1.9             | 5.9    |
| Park et al. (2003), Exp.1          | USA     | Carbohydrazes              | ns                | -0.3                       | 0.4  | -0.4            | n/a    |
| Park et al. (2003), Exp.2          | USA     | Carbohydrazes <sup>4</sup> | ns <sup>2</sup>   | 2.6                        | -5.1 | 1.5             | n/a    |
|                                    |         |                            |                   | 0.4                        | -1.6 | 0.4             | n/a    |
|                                    |         |                            |                   | 0.7                        | -3.5 | 0.9             | n/a    |
| Park et al. (2003), Exp.3          | USA     | Carbohydrazes <sup>4</sup> | ns <sup>2</sup>   | -0.5                       | -1.6 | 0.2             | n/a    |
|                                    |         |                            |                   | -2.9                       | -4.4 | 0.6             | n/a    |
|                                    |         |                            |                   | 0.0                        | -2.7 | 0.6             | n/a    |
| Park et al. (2003)                 | USA     | Carbohydrazes <sup>5</sup> | ns                | -1.2                       | 2.1  | -0.2            | n/a    |
|                                    |         |                            | ns                | -0.1                       | -6.9 | 1.6             | n/a    |
|                                    |         |                            | ns                | -0.1                       | -7.6 | 2.0             | n/a    |
|                                    |         |                            | ns                | -0.3                       | 2.8  | -0.4            | n/a    |
|                                    |         |                            | ns                | -1.2                       | 0.0  | 0.0             | n/a    |
| Flis and Sobotka (2005)            | Poland  | Carbohydrazes              | ns                | n/a                        | n/a  | -0.1            | n/a    |
| Thacker (2005), Exp. 2             | Canada  | Carbohydrazes              | ns                | 0.0                        | -5.3 | 0.7             | -3.1   |
| Thacker and Rossnagel (2005)       | Canada  | Carbohydrazes <sup>5</sup> | ns                | 0.9                        | 0.0  | -0.3            | -3.5   |
|                                    |         |                            | ns                | 0.9                        | -1.6 | 0.3             | 3.1    |
|                                    |         |                            | ns                | -0.1                       | -2.1 | 0.0             | 1.6    |

|                                         |             |                          |                 |      |       |      |      |
|-----------------------------------------|-------------|--------------------------|-----------------|------|-------|------|------|
| Thacker and Rossnagel (2005)            | Canada      | Carbohydres <sup>5</sup> | ns              | 0.5  | -1.2  | 0.0  | 1.0  |
|                                         |             |                          | ns              | 0.1  | -5.9  | 0.8  | 3.2  |
|                                         |             |                          | ns              | 0.9  | -1.8  | -0.2 | -2.8 |
| Świątkiewicz and Hanczakowska (2008)    | Poland      | Carbohydres <sup>5</sup> | ns              | 8.1  | -2.5  | 0.9  | n/a  |
|                                         |             |                          | ns              | 8.3  | -1.9  | -0.7 | n/a  |
|                                         |             |                          |                 |      |       |      |      |
| Wang et al. (2009)                      | South Korea | Carbohydres <sup>a</sup> | ns              | n/a  | 0.8   | 0.7  | 6.5  |
|                                         |             |                          |                 |      |       |      |      |
|                                         |             |                          | ns              | n/a  | 2.5   | 1.1  | 9.8  |
| Yoon et al. (2010), Exp. 1 <sup>4</sup> | South Korea | Carbohydres              | ns <sup>2</sup> | 1.0  | -0.6  | 0.8  | 1.1  |
|                                         |             |                          |                 | 0.2  | -2.5  | 1.8  | 2.3  |
|                                         |             |                          |                 | 0.3  | -1.9  | 1.2  | 1.4  |
| Yoon et al. (2010), Exp. 2              | South Korea | Carbohydres <sup>5</sup> | ns              | 4.0  | 16.1  | -4.8 | -2.6 |
|                                         |             |                          | ns              | 1.8  | 6.7   | 8.1  | 12.7 |
|                                         |             |                          |                 |      |       |      |      |
| Barnes et al. (2011)                    | USA         | Carbohydres <sup>5</sup> | ns              | 0.8  | 0.0   | 0.2  | 0.0  |
|                                         |             |                          | ns              | -1.5 | -1.2  | -0.4 | -3.0 |
|                                         |             |                          | ns              | 0.0  | 0.0   | 0.8  | 2.6  |
| Pauly et al. (2011)                     | Ireland     | Carbohydres <sup>5</sup> | ns              | -1.8 | 6.0   | -1.0 | n/a  |
|                                         |             |                          | percentage lean | 5.1  | -17.0 | 5.6  | n/a  |
|                                         |             |                          |                 |      |       |      |      |
| Hanczakowska et al. (2012)              | Poland      | Carbohydres <sup>4</sup> | ns              | -0.2 | -6.0  | -0.4 | -0.3 |
|                                         |             |                          | ns              | -0.3 | 0.0   | -0.7 | -0.3 |
|                                         |             |                          | ns              | 0.2  | 0.5   | 0.6  | 0.1  |
| Cho and Kim (2013)                      | South Korea | Carbohydres <sup>a</sup> | ns              | n/a  | 2.1   | n/a  | 4.1  |
|                                         |             |                          |                 |      |       |      |      |
|                                         |             |                          | ns              | n/a  | 3.4   | n/a  | 5.1  |
| O'Shea et al. (2014)                    | Ireland     | Carbohydres              | ns              | -0.4 | -6.3  | 1.5  | n/a  |
| Lindemann (2016)                        | USA         | Carbohydres              | ns              | n/a  | 0.1   | -0.1 | -1.1 |
| Villca et al. (2016)                    | Switzerland | Carbohydres              | ns              | -0.1 | -0.7  | -0.2 | -0.9 |
| Nguyen et al. (2018)                    | South Korea | Carbohydres              | ns              | n/a  | n/a   | n/a  | 0.1  |
| Torres-Pitarch et al. (2018)            | Ireland     | Carbohydres              | ns              | 0.0  | 0.0   | 0.5  | -0.2 |
| Smit et al. (2019)                      | Canada      | Carbohydres              | ns              | 0.3  | 0.0   | 0.2  | 0.8  |

|                              |             |                            |                     |      |      |      |       |
|------------------------------|-------------|----------------------------|---------------------|------|------|------|-------|
| Jang et al. (2020)           | South Korea | Carbohydrases              | ns                  | -0.2 | -5.5 | n/a  | n/a   |
| Torres-Pitarch et al. (2020) | Ireland     | Carbohydrases <sup>5</sup> | ns                  | -0.5 | 6.2  | -0.5 | 3.2   |
|                              |             |                            | ns                  | 0.4  | 1.7  | -0.3 | -0.6  |
|                              |             |                            | BF, percentage lean | 0.3  | 1.6  | -0.2 | -1.2  |
| Torres-Pitarch et al. (2020) | Ireland     | Carbohydrases <sup>5</sup> | BF, percentage lean | 0.0  | 6.6  | -1.2 | -0.8  |
| Kpogo et al. (2021)          | Canada      | Carbohydrases              | BF <sup>3</sup>     | 0.2  | 4.8  | n/a  | -1.0  |
| O'Doherty and Forde (1999)   | Ireland     | Proteases                  | ns                  | 0.2  | 10.8 | -2.1 | -4.0  |
| Thacker (2005), Exp. 2       | Canada      | Proteases                  | ns                  | 0.4  | -8.3 | 1.5  | 5.4   |
|                              |             |                            | ns                  | n/a  | n/a  | -1.2 | -6.1  |
| Reyna et al. (2006)          | Mexico      | Proteases <sup>4</sup>     | ns                  | n/a  | n/a  | -1.1 | -5.6  |
|                              |             |                            | ns                  | n/a  | n/a  | -1.9 | -6.5  |
| O'Shea et al. (2014)         | Ireland     | Proteases                  | ns                  | -0.4 | -4.0 | 0.4  | n/a   |
| Stephenson et al. (2014)     | USA         | Proteases                  | Yield               | -1.2 | 0.0  | 0.0  | 0.8   |
| Choe et al. (2017)           | South Korea | Proteases                  | Yield <sup>3</sup>  | 0.2  | -2.7 | -0.2 | n/a   |
| Torres-Pitarch et al. (2018) | Ireland     | Proteases                  | ns                  | -0.7 | 0.8  | -0.3 | -2.0  |
| Figuerola et al. (2019)      | Mexico      | Proteases                  | ns                  | n/a  | 1.9  | n/a  | -0.7  |
|                              |             |                            |                     | n/a  | 1.1  | 0.7  | n/a   |
| Liu et al. (2019)            | South Korea | Proteases <sup>4</sup>     | BF <sup>2,3</sup>   | n/a  | 6.2  | 2.4  | n/a   |
|                              |             |                            |                     | n/a  | 3.7  | 0.9  | n/a   |
| Min et al. (2019)            | South Korea | Proteases                  | ns                  | -0.4 | -5.4 | n/a  | n/a   |
| Lee et al. (2020)            | South Korea | Proteases                  | ns                  | -0.1 | -4.2 | n/a  | n/a   |
| Perez-Palencia et al. (2021) | USA         | Proteases                  | ns                  | n/a  | -1.7 | 0.4  | 1.1   |
| Helander and Partanen (1997) | Finland     | Phytases                   | ns                  | -1.7 | n/a  | n/a  | n/a   |
| O'Doherty et al. (1999)4     | Ireland     | Phytases <sup>4</sup>      | ns                  | 1.1  | -6.5 | 1.3  | 0.9   |
|                              |             |                            | ns                  | 3.1  | 0.0  | -0.2 | 3.5   |
| Brady et al. (2002)          | Ireland     | Phytases                   | Yield               | -1.0 | 2.0  | -0.6 | n/a   |
| Thacker et al. (2006)        | Canada      | Phytases                   | ns                  | 0.0  | -6.7 | 0.0  | -11.6 |
| Thacker and Rossnagel (2006) | Canada      | Phytases                   | ns                  | -0.1 | 2.7  | -0.8 | -11.3 |
| Varley et al. (2010), Exp. 1 | Ireland     | Phytases                   | ns                  | 0.7  | -0.8 | -0.2 | n/a   |

|                               |             |                            |                                                        |      |       |      |      |
|-------------------------------|-------------|----------------------------|--------------------------------------------------------|------|-------|------|------|
| Varley et al. (2010), Exp. 2  | Ireland     | Phytases                   | ns                                                     | -0.7 | 1.6   | -0.5 | n/a  |
| Langbein et al. (2013)        | USA         | Phytases <sup>a</sup>      | ns                                                     | 0.5  | 1.3   | 0.5  | 3.3  |
|                               |             | Phytases <sup>b</sup>      | ns                                                     | 0.3  | 0.0   | 0.3  | 2.1  |
|                               |             | Phytases <sup>c</sup>      | ns                                                     | 0.3  | 1.3   | 0.1  | 1.7  |
| Pérez Alvarado et al. (2015)  | Mexico      | Phytases <sup>a</sup>      | ns                                                     | n/a  | -2.6  | n/a  | -1.8 |
|                               |             | Phytases <sup>b</sup>      | ns                                                     | n/a  | -4.4  | n/a  | -3.0 |
| Lindemann (2016)              | USA         | Phytases <sup>4</sup>      | BF <sup>2,3</sup> ,<br>percentage<br>lean <sup>2</sup> | n/a  | -6.1  | 1.4  | 2.3  |
|                               |             |                            |                                                        | n/a  | -13.4 | 2.9  | 4.0  |
|                               |             |                            |                                                        | n/a  | -10.8 | 2.8  | 6.4  |
| Holloway et al. (2019)        | USA         | Phytases <sup>4</sup>      | ns                                                     | 0.3  | n/a   | n/a  | n/a  |
|                               |             |                            | ns                                                     | 0.0  | n/a   | n/a  | n/a  |
|                               |             |                            | ns                                                     | -0.4 | n/a   | n/a  | n/a  |
| Dang and Kim (2021)           | South Korea | Phytases                   | BF                                                     | n/a  | 8.3   | n/a  | 0.4  |
| Dang and Kim (2021)           | South Korea | Phytases                   | ns                                                     | n/a  | 1.2   | n/a  | 0.3  |
| Thacker (2005), Exp. 2        | Canada      | Multi-enzymes              | ns                                                     | 0.8  | -1.0  | 0.2  | -1.4 |
| Domaćinović et al. (2006)     | Croatia     | Multi-enzymes <sup>5</sup> | ns                                                     | n/a  | n/a   | 1.1  | n/a  |
|                               |             |                            | percentage<br>lean                                     | n/a  | n/a   | 4.4  | n/a  |
| Feoli et al. (2008)           | USA         | Multi-enzymes              | ns                                                     | 0.1  | -1.6  | 0.0  | -1.1 |
| Benz et al. (2009)            | USA         | Multi-enzymes              | ns                                                     | -0.4 | -0.5  | -0.4 | -2.2 |
| Thacker (2009)                | Canada      | Multi-enzymes              | ns                                                     | -1.9 | -3.9  | 0.2  | -3.2 |
| Thacker and Haq (2009)        | Canada      | Multi-enzymes              | ns                                                     | 0.1  | 11.3  | -1.3 | 3.5  |
| Lee et al. (2011)             | South Korea | Multi-enzymes              | ns                                                     | 0.2  | -12.3 | n/a  | n/a  |
| Ao et al. (2011)              | South Korea | Multi-enzymes <sup>4</sup> | ns <sup>2</sup>                                        | n/a  | 1.9   | 0.7  | 0.3  |
|                               |             |                            |                                                        | n/a  | 1.4   | 1.2  | 1.7  |
| Balasubramanian et al. (2020) | South Korea | Multi-enzymes              | BF                                                     | n/a  | -10.2 | n/a  | -6.0 |
| Coelho et al. (2020)          | Portugal    | Multi-enzymes <sup>a</sup> | ns                                                     | -0.3 | 29.4  | n/a  | n/a  |
|                               |             | Multi-enzymes <sup>b</sup> | ns                                                     | -0.4 | 15.5  | n/a  | n/a  |

|                     |       |               |     |     |     |     |      |
|---------------------|-------|---------------|-----|-----|-----|-----|------|
| Huang et al. (2021) | China | Multi-enzymes | LMA | 1.7 | 3.1 | n/a | 11.3 |
|---------------------|-------|---------------|-----|-----|-----|-----|------|

<sup>1</sup>Significant level at  $P \leq 0.05$ . Difference is calculated as [(treatment value – control value) / control value] \* 100%.

<sup>2</sup>Polynomial contrasts were used for statistical analysis.

<sup>3</sup>Significant level at  $0.05 < P \leq 0.10$ .

<sup>4</sup>Same enzyme of each experiment was used with different inclusion levels. The inclusion level of each comparison increases from top to bottom.

<sup>5</sup>For experiments using factorial treatment structures, if the interaction of factors of either interested variable was observed the effect of the feed additive within each level of the other factor is included within the database.

<sup>a,b,c</sup> Enzyme compositions within an experiment with different superscripts differ.

### 3.3. Growth performance - Proteases

Average daily gain significantly increased ( $P \leq 0.05$ ) in 3 comparisons (average of 5.2%), tended to increase ( $0.05 < P \leq 0.10$ ) in 4 comparisons (average of 3.2%), and significantly decreased ( $P \leq 0.05$ ) in 2 comparisons (average of 7.6%) compared to control pigs (Table S21). The greatest proportion of the comparisons found no evidence of difference ( $P > 0.10$ ) in ADG (14 comparisons). Of these, ADG was numerically increased ( $P > 0.10$ ) in 9 comparisons (average of 2.1%) and numerically decreased ( $P > 0.10$ ) in 5 comparisons (average of 3.7%) compared to control pigs. Feed efficiency significantly increased ( $P \leq 0.05$ ) in 7 comparisons (average of 4.9%) and tended to increase ( $0.05 < P \leq 0.10$ ) in 1 comparison (7.6%) compared to control pigs. The greatest proportion of the comparisons found no evidence of difference ( $P > 0.10$ ) in G:F (14 comparisons). Of these, G:F was numerically increased ( $P > 0.10$ ) in 5 comparisons (average of 2.2%) and numerically decreased ( $P > 0.10$ ) in 7 comparisons (average of 2%) compared to control pigs. Overall, the results suggest that proteases had positive effects on ADG and G:F (70 and 59% of all the comparisons), but the effects were small for ADG. Moreover, in a meta-analysis conducted by Aranda-Aguirre et al. [302], the authors found that proteases had no effects ( $P > 0.10$ ) on growth performance of finishing pigs. There were not enough data to support whether different basal diets affected the response to proteases for ADG and G:F. The lack of substantial positive effects of exogenous proteases may be due to the high digestibility of dietary protein with the endogenous proteases of the mature grow-

finish pig. Even though the digestibility of CP or N was improved ( $P \leq 0.05$ ) in some studies [332, 345, 352, 372], the improvements may not be large enough to improve growth performance.

#### 3.4. Carcass Characteristics - Proteases

Back-fat tended to increase ( $0.05 < P \leq 0.10$ ) in 3 comparisons (average of 3.7%) compared to control pigs (Table S22). The greatest proportion of the comparisons found no evidence of difference ( $P > 0.10$ ) in BF (10 comparisons). Of these, BF was numerically increased ( $P > 0.10$ ) in 3 comparisons (average of 4.5%) and numerically decreased ( $P > 0.10$ ) in 6 comparisons (average of 4.4%) compared to control pigs. All the comparisons found no evidence of difference ( $P > 0.10$ ) in percentage lean. Of these, percentage lean was numerically increased ( $P > 0.10$ ) in 6 comparisons (average of 1.1%) and numerically decreased ( $P > 0.10$ ) in 6 comparisons (average of 1.1%) compared to control pigs. All the comparisons found no evidence of difference ( $P > 0.10$ ) in LMA/LD. Of these, LMA/LD was numerically increased ( $P > 0.10$ ) in 3 comparisons (average of 2.4%) and numerically decreased ( $P > 0.10$ ) in 6 comparisons (average of 4.1%) compared to control pigs.

#### 3.5. Growth performance - Phytases

Average daily gain significantly increased ( $P \leq 0.05$ ) in 3 comparisons (average of 6.8%) compared to control pigs (Table S21). The greatest proportion of the comparisons found no evidence of difference ( $P > 0.10$ ) in ADG (21 comparisons). Of these, ADG was numerically

increased ( $P > 0.10$ ) in 12 comparisons (average of 2.6%) and numerically decreased ( $P > 0.10$ ) in 8 comparisons (average of 3.0%) compared to control pigs. Feed efficiency significantly increased ( $P \leq 0.05$ ) in 2 comparisons (average of 5.7%) and tended to increase ( $0.05 < P \leq 0.10$ ) in 1 comparison (2.9%) compared to control pigs. The greatest proportion of the comparisons found no evidence of difference ( $P > 0.10$ ) in G:F (21 comparisons). Of these, G:F was numerically increased ( $P > 0.10$ ) in 13 comparisons (average of 2.3%) and numerically decreased ( $P > 0.10$ ) in 7 comparisons (average of 2.5%) compared to control pigs. Overall, the results suggest that phytases had positive effects on ADG (63% of all comparisons) and G:F (67% of all comparisons), but most comparisons were not statistically significant (88% of all comparisons). Moreover, in a meta-analysis conducted by Aranda-Aguirre et al. [302], the authors found that phytases had no effects ( $P > 0.10$ ) on growth performance of finishing pigs. There was not enough data to support whether different phytase inclusion levels and basal diets affected the response to phytases for ADG and G:F in grow-finish pig diets with adequate P levels.

### 3.6. Carcass Characteristics - Phytases

Back-fat significantly increased ( $P \leq 0.05$ ) in 1 comparison (8.3%) compared to control pigs (Table S22). The greatest proportion of the comparisons found no evidence of difference ( $P > 0.10$ ) in BF (13 comparisons). Of these, BF was numerically increased ( $P > 0.10$ ) in 6 comparisons (average of 1.7%) and numerically decreased ( $P > 0.10$ ) in 5 comparisons (average

of 4.2%) compared to control pigs. All the comparisons found no evidence of difference ( $P > 0.10$ ) in percentage lean. Of these, percentage lean was numerically increased ( $P > 0.10$ ) in 4 comparisons (average of 0.6%) and numerically decreased ( $P > 0.10$ ) in 5 comparisons (average of 0.5%) compared to control pigs. All the comparisons found no evidence of difference ( $P > 0.10$ ) in LMA/LD. Of these, LMA/LD was numerically increased ( $P > 0.10$ ) in 7 comparisons (average of 1.7%) and numerically decreased ( $P > 0.10$ ) in 4 comparisons (average of 6.9%) compared to control pigs.

### 3.7. *Growth performance - Multi-enzymes*

Average daily gain significantly increased ( $P \leq 0.05$ ) in 10 comparisons (average of 7.9%) compared to control pigs (Table S21). The greatest proportion of the comparisons found no evidence of difference ( $P > 0.10$ ) in ADG (19 comparisons). Of these, ADG was numerically increased ( $P > 0.10$ ) in 10 comparisons (average of 2.9%) and numerically decreased ( $P > 0.10$ ) in 8 comparisons (average of 2.3%) compared to control pigs. Feed efficiency significantly increased ( $P \leq 0.05$ ) in 10 comparisons (average of 9.0%) compared to control pigs. The greatest proportion of the comparisons found no evidence of difference ( $P > 0.10$ ) in G:F (19 comparisons). Of these, G:F was numerically increased ( $P > 0.10$ ) in 12 comparisons (average of 1.8%) and numerically decreased ( $P > 0.10$ ) in 5 comparisons (average of 3.3%) compared to control pigs. Overall, the results suggest that multi-enzymes have positive effects on ADG and G:F (69 and 76% of all the comparisons), and multi-enzymes significantly improved ( $P \leq 0.05$ )

ADG and G:F in 34% of all the comparisons. Moreover, the combination of multiple enzymes provided greater improvement than adding any single type of enzyme (carbohydrase, protease, and phytase) alone, which suggests that different types of enzymes may have a synergetic effect. However, most comparisons showed little or negative effects in US-based research; therefore, the utilization of multi-enzymes in US-based diets should be evaluated further. There are not enough data to support whether different basal diets affected the response to multi-enzymes for ADG or G:F. Nevertheless, similar to the results with carbohydrases, multi-enzymes improved pig performance when diets were marginal in nutrient concentrations. In summary, there was a low chance of negative effects by feeding multi-enzymes and they can potentially improve growth performance (approximately 3% improvement for ADG and G:F).

### 3.8. *Carcass Characteristics - Multi-enzymes*

Back-fat significantly decreased ( $P \leq 0.05$ ) in 1 comparison (10.2%) compared to control pigs (Table S22). The greatest proportion of the comparisons found no evidence of difference ( $P > 0.10$ ) in BF (11 comparisons). Of these, BF was numerically increased ( $P > 0.10$ ) in 6 comparisons (average of 10.4%) and numerically decreased ( $P > 0.10$ ) in 5 comparisons (average of 3.8%) compared to control pigs. Percentage lean significantly increased ( $P \leq 0.05$ ) in 1 comparison (4.4%) compared to control pigs. The greatest proportion of the comparisons found no evidence of difference ( $P > 0.10$ ) in percentage lean (8 comparisons). Of these,

percentage lean was numerically increased ( $P > 0.10$ ) in 6 comparisons (average of 0.6%) and numerically decreased ( $P > 0.10$ ) in 2 comparisons (average of 0.9%) compared to control pigs. Loin muscle area/depth significantly increased ( $P \leq 0.05$ ) in 1 comparison (11.3%) compared to control pigs. The greatest proportion of the comparisons found no evidence of difference ( $P > 0.10$ ) in LMA/LD (7 comparisons). Of these, LMA/LD was numerically increased ( $P > 0.10$ ) in 3 comparisons (average of 1.8%) and numerically decreased ( $P > 0.10$ ) in 5 comparisons (average of 2.8%) compared to control pigs.

#### **4. Conclusion**

In conclusion, this literature review collected available research on finishing pig feed additives to provide a descriptive analysis of the effects on growth and carcass performance and provides a database that can be further analyzed with advanced statistical methods, such as meta-analysis, in the hope of better understanding the effect of feed additives to improve the efficiency of swine production.

**Author Contributions:** All authors participated in conceptualization, writing, and review and editing of the manuscript. All authors have read and agreed to the published version of the manuscript.

**Funding:** This article, wholly or in part, was funded by the National Pork Board.

**Institutional Review Board Statement:** Not applicable

**Informed Consent Statement:** Not applicable

**Data Availability Statement:** Not applicable

**Acknowledgments:** Contribution no. 23-016-J from the Kansas Agric. Exp. Stn., Manhattan KS, 66506-0210 USA.

**Conflict of Interest:** The authors declare no conflict of interest.

## References

1. Thacker, P.A.; J.P. Bowland. Influence of Graded Levels of Dietary Propionic Acid on Performance and Carcass Traits of Swine Fed Diets Supplemented with Soybean Meal or Canola Meal. *Can. J. Anim. Sci.* **1980**, 60(4), 971-978.  
doi:10.4141/cjas80-115
2. Thacker, P.A.; J.P. Bowland. Effects of Vitamin B12 on Performance and Carcass Traits of Pigs Fed Diets Supplemented with Propionic Acid or Calcium Propionate. *Can. J. Anim. Sci.* **1981**, 61(3), 775-782. doi:10.4141/cjas81-094
3. Thacker, P.A.; M.O. Salomons; F.X. Aherne; L.P. Milligan; J.P. Bowland. Influence of Propionic Acid on the Cholesterol Metabolism of Pigs Fed Hypercholesterolemic Diets. *Can. J. Anim. Sci.* **1981**, 61(4), 969-975.  
doi:10.4141/cjas81-119
4. Giesting, D.W.; R.A. Easter. Response of Starter Pigs to Supplementation of Corn-Soybean Meal Diets with Organic Acids. *J. Anim. Sci.* **1985**, 60(5), 1288-1294. doi:10.2527/jas1985.6051288x
5. Thacker, P.A.; G.L. Campbell; J. GrootWassink. The Effect of Organic Acids and Enzyme Supplementation on the Performance of Pigs Fed Barley-Based Diets. *Can. J. Anim. Sci.* **1992**, 72(2), 395-402. doi:10.4141/cjas92-047
6. Baustad, B. Effects of Formic Acid on Performance in Growing Pigs. *Norw. J. Agric. Sci.* **1993**, 7(1), 61-69.

7. Krause, D.O.; P.C. Harrison; R.A. Easter. Characterization of the Nutritional Interactions between Organic Acids and Inorganic Bases in the Pig and Chick. *J. Anim. Sci.* **1994**, 72(5), 1257-1262. doi:10.2527/1994.7251257x
8. Siljander-Rasi, H.; T. Alaviuhkola; K. Suomi. Carbadox, Formic Acid and Potato Fibre as Feed Additives for Growing Pigs. *J. Anim. Feed Sci.* **1998**, 7(Supp 1), 205-209. doi:10.22358/jafs/69977/1998
9. Partanen, K.; H. Siljander-Rasi; T. Alaviuhkola; K. Suomi; M. Fossi. Performance of Growing-Finishing Pigs Fed Medium- or High-Fibre Diets Supplemented with Avilamycin, Formic Acid or Formic Acid-Sorbate Blend. *Livest. Prod. Sci.* **2002**, 73(2/3), 139-152. doi:10.1016/S0301-6226(01)00255-X
10. Canibe, N.; O. Højberg; S. Højsgaard; B.B. Jensen. Feed Physical Form and Formic Acid Addition to the Feed Affect the Gastrointestinal Ecology and Growth Performance of Growing Pigs. *J. Anim. Sci.* **2005**, 83(6), 1287-1302. doi:10.2527/2005.8361287x
11. Jansons, I.; J. Nudiens. Acidifiers Additive Projection on Pigs Metabolic Processes and Digestive Tract Microflora. *Res. Rural Dev.* **2005**, 23-25.
12. Bühler, K.; C. Wenk; J. Broz; S. Gebert. Influence of Benzoic Acid and Dietary Protein Level on Performance, Nitrogen Metabolism and Urinary Ph in Growing-Finishing Pigs. *Arch. Anim. Nutr.* **2006**, 60(5), 382-9. doi:10.1080/17450390600884369
13. Campbell, A.J.; G.E. Gardiner; F.C. Leonard; P.B. Lynch; C. Stanton; R.P. Ross; P.G. Lawlor. The Effect of Dietary Supplementation of Finishing Pigs with Organic Acids or Mannan-Oligosaccharide on the Coliform, Lactobacillus and Bifidobacterium Flora on the Intestinal Contents and Faeces. *Pig J.* **2006**, 57, 90-104.

14. Partanen, K.; M. Karhapää; H. Siljander-Rasi; E. Virtanen; B. Nilsson. Performance, Carcass Quality, and Gastric Alterations in Fattening Pigs Fed Additives Containing Formic Acid Either Coated with Sorbate or Mixed with Lactic Acid. *Agric. Food Sci.* **2006**, 15(3), 324-339. doi:10.2137/145960606779216308
15. Eisemann, J.H.; E.v. Heugten. Response of Pigs to Dietary Inclusion of Formic Acid and Ammonium Formate. *J. Anim. Sci.* **2007**, 85(6), 1530-1539. doi:10.2527/jas.2006-464
16. Øverland, M.; N.P. Kjos; M. Borg; H. Sørum. Organic Acids in Diets for Entire Male Pigs. *Livest. Sci.* **2007**, 109(1/3), 170-173. doi:10.1016/j.livsci.2007.02.002
17. Guy, J.H.; H.L. Edge; P.J. Blanchard; S.E. Ilsley; C. Coonan; D. Feuerstein. A Note on the Effect of Supplementation with Microbial Phytase and Organic Acids on Feed Intake and Growth Performance of Growing Pigs. *Irish J. Agric. Food Res.* **2008**, 47(1), 93-97.
18. Kijparkorn, S.; U. Jamikorn; S. Wangsoonean; P. Ittitanawong. Antioxidant and Acidifier Properties of Roselle (Hibicus Sabdariffa Linn.) Calyx Powder on Lipid Peroxidation, Nutrient Digestibility and Growth Performance in Fattening Pigs. *Thai. J. Vet. Med* **2009**, 39(1), 41-51.
19. Thacker, P.A.; I. Haq. Effect of Enzymes, Flavor and Organic Acids on Nutrient Digestibility, Performance and Carcass Traits of Growing-Finishing Pigs Fed Diets Containing Dehydrated Lucerne Meal. *J. Sci. Food Agric.* **2009**, 89(1), 101-108. doi:10.1002/jsfa.3415
20. Jansons, I.; A. Jemeljanovs; I.H. Konosonoka; V. Sterna; B. Lujane. The Influence of Organic Acid Additive, Phytoadditive and Complex of Organic Acid Additive Phytoadditive on Pig Productivity, Meat Quality. *Agron. Res.* **2011**, 9(Special Issue II), 389-394.

21. Upadhaya, S.D.; K.Y. Lee; I.H. Kim. Protected Organic Acid Blends as an Alternative to Antibiotics in Finishing Pigs. *Asian Australas. J. Anim. Sci.* **2014**, 27(11), 1600-1607. doi:10.5713/ajas.2014.14356
22. Cho, J.H.; S.I. Lee; I.H. Kim. Effects of Different Levels of Fibre and Benzoic Acid on Growth Performance, Nutrient Digestibility, Reduction of Noxious Gases, Serum Metabolites and Meat Quality in Finishing Pigs. *J. Appl. Anim. Res.* **2015**, 43(3), 336-344. doi:10.1080/09712119.2014.978772
23. Giannenas, I.; D. Doukas; A. Karamoutsios; A. Tzora; E. Bonos; I. Skoufos; A. Tsinas; E. Christaki; D. Tontis; P. Florou-Paneri. Effects of Enterococcus Faecium, Mannan Oligosaccharide, Benzoic Acid and Their Mixture on Growth Performance, Intestinal Microbiota, Intestinal Morphology and Blood Lymphocyte Subpopulations of Fattening Pigs. *Anim. Feed Sci. Technol.* **2016**, 220, 159-167. doi:10.1016/j.anifeedsci.2016.08.003
24. Zhai, H.; W. Ren; S. Wang; J. Wu; P. Guggenbuhl; A.M. Klünter. Growth Performance of Nursery and Grower-Finisher Pigs Fed Diets Supplemented with Benzoic Acid. *Anim. Nutr.* **2017**, 3(3), 232-235. doi:10.1016/j.aninu.2017.05.001
25. Lei, X.J.; S.I. Lee; K.Y. Lee; D.H. Nguyen; I.H. Kim. Effects of a Blend of Organic Acids and Medium-Chain Fatty Acids with and without Enterococcus Faecium on Growth Performance, Nutrient Digestibility, Blood Parameters, and Meat Quality in Finishing Pigs. *Can. J. Anim. Sci.* **2018**, 98(4), 852-859. doi:10.1139/cjas-2017-0126
26. Nguyen Thi, T. Probiotic and Organic Acids Improve Growth Performance of Pigs Fed Diets Containing Catfish (*Pangasius Hypophthalmus*) Protein Hydrolysate. *Livest. Res. Rural. Dev.* **2018**, 30(8), 143.

27. Morel, P.C.H.; K.L. Chidgey; C.M.C. Jenkinson; I. Lizarraga; N.M. Schreurs. Effect of Benzoic Acid, Sodium Butyrate and Sodium Butyrate Coated with Benzoic Acid on Growth Performance, Digestibility, Intestinal Morphology and Meat Quality in Grower-Finisher Pigs. *Livest. Sci.* **2019**, 226, 107-113. doi:10.1016/j.livsci.2019.06.009
28. Nguyen, D.H.; K.Y. Lee; H.N. Tran; I.H. Kim. Effect of a Protected Blend of Organic Acids and Medium-Chain Fatty Acids on Growth Performance, Nutrient Digestibility, Blood Profiles, Meat Quality, Faecal Microflora, and Faecal Gas Emission in Finishing Pigs. *Can. J. Anim. Sci.* **2019**, 99(3), 448-455. doi:10.1139/cjas-2016-0174
29. O' Meara, F.M.; G.E. Gardiner; J.V. O' Doherty; P.G. Lawlor. Effect of Dietary Inclusion of Benzoic Acid (Vevovitall®) on the Microbial Quality of Liquid Feed and the Growth and Carcass Quality of Grow-Finisher Pigs. *Livest. Sci.* **2020**, 237. doi:10.1016/j.livsci.2020.104043
30. Tran Thi Bich, N.; O. Duong Thi; L. Pineda; S. Ayudhya; N.d. Groot; Y. Han. The Effects of Synergistic Blend of Organic Acid or Antibiotic Growth Promoter on Performance and Antimicrobial Resistance of Bacteria in Grow-Finish Pigs. *Transl. Anim. Sci.* **2020**, 4(4). doi:10.1093/tas/txaa211
31. Muniyappan, M.; T. Palanisamy; I.H. Kim. Effect of Microencapsulated Organic Acids on Growth Performance, Nutrient Digestibility, Blood Profile, Fecal Gas Emission, Fecal Microbial, and Meat-Carcass Grade Quality of Growing-Finishing Pigs. *Livest. Sci.* **2021**, 252. doi:10.1016/j.livsci.2021.104658
32. Tutida, Y.H.; J.H. Montes; K.K. Borstnez; H.A. Siqueira; M.F. Güths; F. Moreira; V. Peripolli; R. Irgang; N. Morés; I. Bianchi; J.D. Kich. Effects of in Feed Removal of Antimicrobials in Comparison to Other Prophylactic Alternatives in Growing and Finishing Pigs. *Arq. Bras. Med. Vet. Zootec.* **2021**, 73(6), 1381-1390. doi:10.1590/1678-4162-12450

33. Onibala, J.S.I.T.; K.D. Gunther; U.t. Meulen. Effects of Essential Oil of Spices as Feed Additives on the Growth and Carcass Characteristics of Growing-Finishing Pigs. *Tropenlandwirt* **2001**(No.73), 179-184.
  
34. Yan, L.; J.P. Wang; H.J. Kim; Q.W. Meng; X. Ao; S.M. Hong; I.H. Kim. Influence of Essential Oil Supplementation and Diets with Different Nutrient Densities on Growth Performance, Nutrient Digestibility, Blood Characteristics, Meat Quality and Fecal Noxious Gas Content in Grower-Finisher Pigs. *Livest. Sci.* **2010**, 128(1/3), 115-122.  
  
doi:10.1016/j.livsci.2009.11.008
  
35. Simitzis, P.E.; G.K. Symeon; M.A. Charismiadou; J.A. Bizelis; S.G. Deligeorgis. The Effects of Dietary Oregano Oil Supplementation on Pig Meat Characteristics. *Meat Sci.* **2010**, 84(4), 670-676. doi:10.1016/j.meatsci.2009.11.001
  
36. Zhou, Y.; Z. Ruan; X.L. Li; S.M. Mi; M. Jiang; W.H. Liu; H.S. Yang; X. Wu; G.L. Jiang; Y.L. Yin. Eucommia Ulmoides Oliver Leaf Polyphenol Supplementation Improves Meat Quality and Regulates Myofiber Type in Finishing Pigs. *J. Anim. Sci.* **2016**, 94(Suppl. 3), 164-168. doi:10.2527/jas.2015-9551
  
37. Zou, Y.; Q. Xiang; J. Wang; H. Wei; J. Peng. Effects of Oregano Essential Oil or Quercetin Supplementation on Body Weight Loss, Carcass Characteristics, Meat Quality and Antioxidant Status in Finishing Pigs under Transport Stress. *Livest. Sci.* **2016**, 192, 33-38. doi:10.1016/j.livsci.2016.08.005
  
38. Li, T.S.; W.C. Liu; P.Y. Zhao; I.H. Kim. Evaluation of Essential Oil or/and Emulsifier in Low Energy Density Diets on Growth Performance, Nutrient Digestibility, Blood Cholesterol and Meat Quality in Finishing Pigs. *Ital. J. Anim. Sci.* **2017**, 16(4), 624-630. doi:10.1080/1828051X.2017.1325718

39. Soto, J.; M.D. Tokach; S.S. Dritz; J.C. Woodworth; J.M. DeRouchey; R.D. Goodband. Evaluation of Dietary Phytonutrients on Growth Performance and Carcass Characteristics of Pigs During the Growing-Finishing Phase. *Kansas Agricultural Experiment Station Research Reports* **2017**, 3(7). doi:10.4148/2378-5977.7498
40. Zou, Y.; X. Hu; T. Zhang; H. Wei; Y. Zhou; Z. Zhou; J. Peng. Effects of Dietary Oregano Essential Oil and Vitamin E Supplementation on Meat Quality, Stress Response and Intestinal Morphology in Pigs Following Transport Stress. *J. Vet. Med. Sci.* **2017**, 79(2), 328-335. doi:10.1292/jvms.16-0576
41. Cheng, C.; M. Xia; X. Zhang; C. Wang; S. Jiang; J. Peng. Supplementing Oregano Essential Oil in a Reduced-Protein Diet Improves Growth Performance and Nutrient Digestibility by Modulating Intestinal Bacteria, Intestinal Morphology, and Antioxidative Capacity of Growing-Finishing Pigs. *Animals* **2018**, 8(9), 159. doi:10.3390/ani8090159
42. Lan, R.; I. Kim. Effects of Feeding Diets Containing Essential Oils and Betaine to Heat-Stressed Growing-Finishing Pigs. *Arch. Anim. Nutr.* **2018**, 72(5), 368-378. doi:10.1080/1745039x.2018.1492806
43. Lowell, J.E.; B.M. Bohrer; K.B. Wilson; M.F. Overholt; B.N. Harsh; H.H. Stein; A.C. Dilger; D.D. Boler. Growth Performance, Carcass Quality, Fresh Belly Characteristics, and Commercial Bacon Slicing Yields of Growing-Finishing Pigs Fed a Subtherapeutic Dose of an Antibiotic, a Natural Antimicrobial, or Not Fed an Antibiotic or Antimicrobial. *Meat Sci.* **2018**, 136, 93-103. doi:10.1016/j.meatsci.2017.10.011
44. Huang, C.; D. Chen; G. Tian; J. He; P. Zheng; J. Yu; X. Mao; Z. Huang; H. Yan; Q. Wang; H. Wang; B. Yu. Effects of Dietary Plant Essential Oil Supplementation on Growth Performance, Nutrient Digestibility and Meat Quality in Finishing Pigs. *J. Anim. Physiol. Anim. Nutr. (Berl.)* **2021**. doi:10.1111/jpn.13673

45. Cho, J.H.; M.H. Song; I.H. Kim. Effect of Microencapsulated Blends of Organic Acids and Essential Oils Supplementation on Growth Performance and Nutrient Digestibility in Finishing Pigs. *Rev. Colomb. Cienc. Pecu.* **2014**, 27(4), 264-272.
46. Walia, K.; H. Argüello; H. Lynch; J. Grant; G. Duffy. Effect of Strategic Administration of an Encapsulated Blend of Formic Acid, Citric Acid, and Essential Oils on Salmonella Carriage, Seroprevalence, and Growth of Finishing Pigs. *Prev. Vet. Med.* **2017**, 137, 28-35. doi:10.1016/j.prevetmed.2016.12.007
47. Oh, H.J.; I.H. Kim; M.H. Song; W.G. Kwak; W. Yun; J.H. Lee; C.H. Lee; S.Y. Oh; S. Liu; J.S. An; H.B. Kim; J.H. Cho. Effects of Microencapsulated Complex of Organic Acids and Essential Oils on Growth Performance, Nutrient Retention, Blood Profiles, Fecal Microflora, and Lean Meat Percentage in Weaning to Finishing Pigs. *Can. J. Anim. Sci.* **2019**, 99(1), 41-49. doi:10.1139/cjas-2018-0006
48. Resende, M.; R.F. Chaves; R.M. Garcia; J.A. Barbosa; A.S. Marques; L.R. Rezende; A.P. Peconick; C.A.P. Garbossa; D. Mesa; C.C. Silva; V.B. Fascina; F.T.F. Dias; V.d.S. Cantarelli. Benzoic Acid and Essential Oils Modify the Cecum Microbiota Composition in Weaned Piglets and Improve Growth Performance in Finishing Pigs. *Livest. Sci.* **2020**, 242. doi:10.1016/j.livsci.2020.104311
49. Hutchens, W.M.; M.D. Tokach; J.C. Woodworth; J.M. Derouchey; R.D. Goodband; J.T. Gebhardt; H.I. Calderon; K. Keppy; P. Maynard; E. Grilli. Evaluation of Microencapsulated Organic Acids and Botanicals on Growth Performance of Nursery and Growing-Finishing Pigs. *Transl. Anim. Sci.* **2021**, 5(4). doi:10.1093/tas/txab205
50. Zimmermann, J.A.; M.L. Fusari; E. Rossler; J.E. Blajman; A. Romero-Scharpen; D.M. Astesana; C.R. Olivero; A.P. Berisvil; M.L. Signorini; M.V. Zbrun; L.S. Frizzo; L.P. Soto. Effects of Probiotics in Swines Growth Performance: A

Meta-Analysis of Randomised Controlled Trials. *Anim. Feed Sci. Technol.* **2016**, 219, 280-293.

doi:10.1016/j.anifeedsci.2016.06.021

51. Pollmann, D.S.; D.M. Danielson; E.R. Peo, Jr. Effects of Microbial Feed Additives on Performance of Starter and Growing-Finishing Pigs. *J. Anim. Sci.* **1980**, 51(3), 577-581. doi:10.2527/jas1980.513577x
52. Harper, A.F.; E.T. Kornegay; K.L. Bryant; H.R. Thomas. Efficacy of Virginiamycin and a Commercially-Available Lactobacillus Probiotic in Swine Diets. *Anim. Feed Sci. Technol.* **1983**, 8(1), 69-76. doi:10.1016/0377-8401(83)90044-5
53. Kim, I.H.; J.D. Hancock; R.H. Hines; C.S. Kim. Effects of Cellulase Enzymes and Bacterial Feed Additives on the Nutritional Value of Sorghum Grain for Finishing Pigs. *Asian Australas. J. Anim. Sci.* **1998**, 11(5), 538-544.  
  
doi:10.5713/ajas.1998.538
54. Kyriakis, S.C.; I. Georgoulakis; A. Spais; C. Alexopoulos; C.C. Miliotis; S.K. Kritas. Evaluation of Toyocerin, a Probiotic Containing Bacillus Toyoi Spores, on Health Status and Productivity of Weaned, Growing and Finishing Pigs. *Asian Australas. J. Anim. Sci.* **2003**, 16(9), 1326-1331. doi:10.5713/ajas.2003.1326
55. Alexopoulos, C.; I.E. Georgoulakis; A. Tzivara; C.S. Kyriakis; A. Govaris; S.C. Kyriakis. Field Evaluation of the Effect of a Probiotic-Containing Bacillus Licheniformis and Bacillus Subtilis Spores on the Health Status, Performance, and Carcass Quality of Grower and Finisher Pigs. *J. Vet. Med.* **2004**, 51(6), 306-312. doi:10.1111/j.1439-0442.2004.00637.x
56. Rekiel, A.; J. Więcek; M. Dziuba. Effect of Feed Additives on the Results of Fattening and Selected Slaughter and Quality Traits of Pork Meat of Pigs with Different Genotypes. *Czech J. Anim. Sci.* **2005**, 50(12), 561-567.  
  
doi:10.17221/4262-CJAS

57. Jukna, Č.; V. Jukna; A. Šimkus. The Effect of Probiotics and Phytobiotics on Meat Properties and Quality of Pigs. *Vet. ir Zootech.* **2005**, 29(51), 80-84.
58. Shon, K.S.; J.W. Hong; O.S. Kwon; B.J. Min; W.B. Lee; I.H. Kim; Y.H. Park; I.S. Lee. Effects of Lactobacillus Reuteri-Based Direct-Fed Microbial Supplementation for Growing-Finishing Pigs. *Asian Australas. J. Anim. Sci.* **2005**, 18(3), 370-374. doi:10.5713/ajas.2005.370
59. Chen, Y.J.; B.J. Min; J.H. Cho; O.S. Kwon; K.S. Son; H.J. Kim; I.H. Kim. Effects of Dietary Bacillus-Based Probiotic on Growth Performance, Nutrients Digestibility, Blood Characteristics and Fecal Noxious Gas Content in Finishing Pigs. *Asian Australas. J. Anim. Sci.* **2006**, 19(4), 587-592. doi:10.5713/ajas.2006.587
60. Chen, Y.J.; B.J. Min; J.H. Cho; O.S. Kwon; K.S. Son; I.H. Kim; S.J. Kim. Effects of Dietary Enterococcus Faecium Sf68 on Growth Performance, Nutrient Digestibility, Blood Characteristics and Faecal Noxious Gas Content in Finishing Pigs. *Asian Australas. J. Anim. Sci.* **2006**, 19(3), 406-411. doi:10.5713/ajas.2006.406
61. Davis, M.E.; T. Parrott; D.C. Brown; B.Z.d. Rodas; Z.B. Johnson; C.V. Maxwell; T. Rehberger. Effect of a Bacillus-Based Direct-Fed Microbial Feed Supplement on Growth Performance and Pen Cleaning Characteristics of Growing-Finishing Pigs. *J. Anim. Sci.* **2008**, 86(6), 1459-1467. doi:10.2527/jas.2007-0603
62. Ko, S.Y.; I.H. Bae; S.T. Yee; S.S. Lee; D. Uuganbayar; J.I. Oh; C.J. Yang. Comparison of the Effect of Green Tea by-Product and Green Tea Probiotics on the Growth Performance, Meat Quality, and Immune Response of Finishing Pigs. *Asian Australas. J. Anim. Sci.* **2008**, 21(10), 1486-1494. doi:10.5713/ajas.2008.70604
63. Ko, S.Y.; C.J. Yang. Effect of Green Tea Probiotics on the Growth Performance, Meat Quality and Immune Response in Finishing Pigs. *Asian Australas. J. Anim. Sci.* **2008**, 21(9), 1339-1347. doi:10.5713/ajas.2008.70597

64. Černauskienė, J.; Z. Bartkevičiūtė; J. Hammerer; K. Kozłowski; H. Jeroch. The Effect of "Bonvital", a Probiotic Product Containing *Enterococcus Faecium* on the Fattening Performance, Carcass Characteristics and Meat Quality of Pigs under Production Conditions. *Vet. ir Zootech.* **2010**, 54(76), 20-25.
65. Meng, Q.W.; L. Yan; X. Ao; T.X. Zhou; J.P. Wang; J.H. Lee; I.H. Kim. Influence of Probiotics in Different Energy and Nutrient Density Diets on Growth Performance, Nutrient Digestibility, Meat Quality, and Blood Characteristics in Growing-Finishing Pigs. *J. Anim. Sci.* **2010**, 88(10), 3320-3326. doi:10.2527/jas.2009-2308
66. Giang, H.H.; T.Q. Viet; B. Ogle; J.E. Lindberg. Effects of Supplementation of Probiotics on the Performance, Nutrient Digestibility and Faecal Microflora in Growing-Finishing Pigs. *Asian Australas. J. Anim. Sci.* **2011**, 24(5), 655-661. doi:10.5713/ajas.2011.10238
67. Nitikanchana, S.; M.D. Tokach; J.M. DeRouchey; R.D. Goodband; J.L. Nelssen; S.S. Dritz, *The Effect of Bacillus Probiotic on Growth Performance and Fecal Consistency of Growing-Finishing Pigs*, in *Kansas State University Swine Day*. 2011, Kansas State University: Kansas. p. 240-246.
68. Hossain, M.E.; S.Y. Ko; K.W. Park; J.D. Firman; C.J. Yang. Evaluation of Green Tea by-Product and Green Tea Plus Probiotics on the Growth Performance, Meat Quality and Immunity of Growing-Finishing Pigs. *Anim. Prod. Sci.* **2012**, 52(9), 857-866. doi:10.1071/AN11141
69. Cui, C.; C.J. Shen; G. Jia; K.N. Wang. Effect of Dietary *Bacillus Subtilis* on Proportion of Bacteroidetes and Firmicutes in Swine Intestine and Lipid Metabolism. *Genet. Mol. Res.* **2013**, 12(2), 1766-1776. doi:10.4238/2013.May.23.1

70. Kerr, B.J.; T.E. Weber; G.C. Shurson. Evaluation of Commercially Available Enzymes, Probiotics, or Yeast on Apparent Total-Tract Nutrient Digestion and Growth in Nursery and Finishing Pigs Fed Diets Containing Corn Dried Distillers Grains with Solubles. *Prof. Anim. Sci.* **2013**, 29(5), 508-517. doi:10.15232/S1080-7446(15)30272-2
71. Liu, T.; B. Su; J. Wang; C. Zhang; A. Shan. Effects of Probiotics on Growth, Pork Quality and Serum Metabolites in Growing-Finishing Pigs. *J. Northeast Agric. Univ.* **2013**, 20(4), 57-63. doi:10.1016/S1006-8104(14)60048-9
72. Balasubramanian, B.; T. Li; I.H. Kim. Effects of Supplementing Growing-Finishing Pig Diets with *Bacillus* Spp. Probiotic on Growth Performance and Meat-Carcass Grade Quality Traits. *Rev. Bras. Zootec.* **2016**, 45(3), 93-100. doi:10.1590/S1806-92902016000300002
73. Dowarah, R.; A.K. Verma; A. Neeta; S. Putan. Effect of Swine-Based Probiotic on Growth Performance, Nutrient Utilization and Immune Status of Early-Weaned Grower-Finisher Crossbred Pigs. *Anim. Nutr. Feed Technol.* **2016**, 16(3), 451-461. doi:10.5958/0974-181X.2016.00042.1
74. Jørgensen, J.N.; J.S. Laguna; C. Millán; O. Casabuena; M.I. Gracia. Effects of a *Bacillus*-Based Probiotic and Dietary Energy Content on the Performance and Nutrient Digestibility of Wean to Finish Pigs. *Anim. Feed Sci. Technol.* **2016**, 221, 54-61. doi:10.1016/j.anifeedsci.2016.08.008
75. Sarker, M.S.K.; A.B.M.R. Bostami; G.M. Kim; H. Ji; C. Yang. Potential of Bamboo Vinegar with Liquid Probiotics on Growth Performance, Fecal Microbiology and Fecal Odorous Gas Emissions from Finishing Pigs. *Afr. J. Microbiol. Res.* **2016**, 10(11), 363-369. doi:10.5897/AJMR2016.7936
76. Nguyen, D.H.; K.Y. Lee; H.N. Tran; S.D. Upadhaya; Y.J. Jeong; I.H. Kim. Influence of *Enterococcus Faecium* and Endo-1,4-B-Xylanase Supplementation on Growth Performance, Nutrient Digestibility, Fecal Microflora, Fecal Gas

- Emission, and Meat Quality in Finishing Pigs Fed with Diets Based on Corn–Soybean Meal. *Can. J. Anim. Sci.* **2017**, 98(1), 126-134. doi:10.1139/cjas-2016-0197
77. Tufarelli, V.; A.M. Crovace; G. Rossi; V. Laudadio. Effect of a Dietary Probiotic Blend on Performance, Blood Characteristics, Meat Quality and Faecal Microbial Shedding in Growing-Finishing Pigs. *S. Afr. J. Anim. Sci.* **2017**, 47(6), 875-882. doi:10.4314/sajas.v47i6.15
78. Balasubramanian, B.; S.I. Lee; I.H. Kim. Inclusion of Dietary Multi-Species Probiotic on Growth Performance, Nutrient Digestibility, Meat Quality Traits, Faecal Microbiota and Diarrhoea Score in Growing–Finishing Pigs. *Ital. J. Anim. Sci.* **2018**, 17(1), 100-106. doi:10.1080/1828051X.2017.1340097
79. Bučko, O.; A. Lehotayová; I. Imrich; I. Bahelka. Carcass Characteristics and Meat Quality of Pigs Fed Diets Containing Probiotic Preparation Based on *Lactobacillus Plantarum*. *Res. Pig Breed.* **2018**, 12(1), 1-4.
80. Samolińska, W.; E. Kowalczyk-Vasilev; E.R. Grela. Comparative Effect of Different Dietary Inulin Sources and Probiotics on Growth Performance and Blood Characteristics in Growing–Finishing Pigs. *Arch. Anim. Nutr.* **2018**, 72(5), 379-395. doi:10.1080/1745039X.2018.1505147
81. Shi, D.; J. Zhou; L. Zhao; X. Rong; Y. Fan; H. Hamid; W. Li; C. Ji; Q. Ma. Alleviation of Mycotoxin Biodegradation Agent on Zearalenone and Deoxynivalenol Toxicosis in Immature Gilts. *J. Anim. Sci. Biotechnol.* **2018**, 9, 42. doi:10.1186/s40104-018-0255-z
82. Lan, R.; I. Kim. Effects of *Bacillus Licheniformis* and *Bacillus Subtilis* Complex on Growth Performance and Faecal Noxious Gas Emissions in Growing-Finishing Pigs. *J. Sci. Food Agric.* **2019**, 99(4), 1554-1560. doi:10.1002/jsfa.9333

83. Wang, H.; I. Kim. Influence of the Efficacy of a Probiotic Complex Containing *Bacillus Subtilis* and *Pichia Farinosa* on the Growth Performance and Fecal Microbiota of Finishing Pigs. *Can. J. Anim. Sci.* **2019**, 99(4), 966-970.  
  
doi:10.1139/cjas-2018-0226
84. Peet-Schwering, C.M.C.v.d.; R. Verheijen; L. Jørgensen; L. Raff. Effects of a Mixture of *Bacillus Amyloliquefaciens* and *Bacillus Subtilis* on the Performance of Growing-Finishing Pigs. *Anim. Feed Sci. Technol.* **2020**, 261.  
  
doi:10.1016/j.anifeedsci.2020.114409
85. Reszka, P.; A. Dunislawaska; A. Slawinska; M. Siwek; W. Kapelański; J. Bogucka. Influence of the Effective Microorganisms (Em) on Performance, Intestinal Morphology and Gene Expression in the Jejunal Mucosa of Pigs Fed Different Diets. *J. Anim. Physiol. Anim. Nutr. (Berl.)* **2020**, 104(5), 1444-1453. doi:10.1111/jpn.13404
86. Rybarczyk, A.; E. Boguslawska-Was; A. Lupkowska. Effect of Em® Probiotic on Gut Microbiota, Growth Performance, Carcass and Meat Quality of Pigs. *Livest. Sci.* **2020**, 241. doi:10.1016/j.livsci.2020.104206
87. Frimpong, Y.O.; M. Boateng; K.O. Amoah; P.Y. Atuahene; S.O. Okungbowa; J. Baah; D.B. Okai. Response of Large White Gilts to Diets Containing Differing Probiotic Products. *Sci. Afr.* **2021**, 13(4). doi:10.1016/j.sciaf.2021.e00878
88. Grela, E.R.; M. Świątkiewicz; M. Florek; M. Bąkowski; G. Skiba. Effect of Inulin Source and a Probiotic Supplement in Pig Diets on Carcass Traits, Meat Quality and Fatty Acid Composition in Finishing Pigs. *Animals* **2021**, 11(8).  
  
doi:10.3390/ani11082438
89. Kwak, M.J.; P.L. Tan; J.K. Oh; K.S. Chae; J. Kim; S.H. Kim; J.S. Eun; S.W. Chee; D.K. Kang; S.H. Kim; K.Y. Whang. The Effects of Multispecies Probiotic Formulations on Growth Performance, Hepatic Metabolism, Intestinal Integrity and Fecal Microbiota in Growing-Finishing Pigs. *Anim. Feed Sci. Technol.* **2021**, 274. doi:10.1016/j.anifeedsci.2021.114833

90. Pomorska-Mól, M.; H. Turlewicz-Podbielska; J. Wojciechowski. Effects of the Microencapsulated Feed Additive of Lactic Acid Bacteria on Production Parameters and Post-Vaccinal Immune Response in Pigs. *Pol. J. Vet. Sci.* **2021**, 24(3), 335-343. doi:10.24425/pjvs.2021.137670
91. Rybarczyk, A.; E. Bogusławska-Wąs; A. Dłubała. Effect of Bioplus Yc Probiotic Supplementation on Gut Microbiota, Production Performance, Carcass and Meat Quality of Pigs. *Animals* **2021**, 11(6). doi:10.3390/ani11061581
92. Shen, W.; Y. Liu; X. Zhang; X. Zhang; X. Rong; L. Zhao; C. Ji; Y. Lei; Q. Ma; J. Chen; F. Li. Comparison of Ameliorative Effects between Probiotic and Biodegradable Bacillus Subtilis on Zearalenone Toxicosis in Gilts. *Toxins* **2021**, 13(12). doi:10.3390/toxins13120882
93. Runjun, D.; A.K. Verma; A. Neeta; S. Putan. Efficacy of Species-Specific Probiotic Pediococcus Acidilactici Ft28 on Blood Biochemical Profile, Carcass Traits and Physicochemical Properties of Meat in Fattening Pigs. *Res. Vet. Sci.* **2018**, 117, 60-64. doi:10.1016/j.rvsc.2017.11.011
94. Reszka, P.; D. Cygan-Szczegielniak; H. Jankowiak; A. Cebulska; B. Mikołajczak; J. Bogucka. Effects of Effective Microorganisms on Meat Quality, Microstructure of the Longissimus Lumborum Muscle, and Electrophoretic Protein Separation in Pigs Fed on Different Diets. *Animals* **2020**, 10(10). doi:10.3390/ani10101755
95. Tian, Z.; Y. Cui; H. Lu; G. Wang; X. Ma. Effect of Long-Term Dietary Probiotic Lactobacillus Reuteri 1 or Antibiotics on Meat Quality, Muscular Amino Acids and Fatty Acids in Pigs. *Meat Sci.* **2021**, 171. doi:10.1016/j.meatsci.2020.108234
96. Barber, R.S.; R. Braude; K.G. Mitchell; A.W. Myres. The Value of Hydrocarbon-Grown yeast S as a Source of Protein for Growing Pigs. *Br. J. Nutr.* **1971**, 25(2), 285-94. doi:10.1079/bjn19710089

97. Bowman, G.L.; T.L. Veum. *Saccharomyces Cerevisiae* Yeast Culture in Growing-Finishing Swine Diets. *J. Anim. Sci.* **1973**, 37(1), 72-74.
98. Burnett, G.S.; E.L. Neil. A Note on the Effect of Probioticum Feed Additive on the Live-Weight Gain, Feed Conversion and Carcass Quality of Bacon Pigs. *Anim. Prod.* **1977**, 25(1), 95-98. doi:10.1017/S0003356100039088
99. Bae, K.H.; T.G. Ko; J.H. Kim; W.T. Cho; Y.K. Han; I.K. Han. Use of Metabolically Active Substances to Substitute for Antibiotics in Finishing Pigs. *Korean J. Anim. Sci.* **1999**, 41(1), 23-30.
100. Davis, M.E.; C.V. Maxwell; D.C. Brown; B.Z.d. Rodas; Z.B. Johnson; E.B. Kegley; D.H. Hellwig; R.A. Dvorak. Effect of Dietary Mannan Oligosaccharides and(or) Pharmacological Additions of Copper Sulfate on Growth Performance and Immunocompetence of Weanling and Growing/Finishing Pigs. *J. Anim. Sci.* **2002**, 80(11), 2887-2894.  
doi:10.2527/2002.80112887x
101. Reynoso-González, E.; M. Cervantes-Ramírez; J.L. Figueroa-Velasco; A. Morales-Trejo; A. Araiza-Piña; J. Yáñez-Hernández. Levels of Protein, Fiber, and Yeast *Saccharomyces Cerevisiae* in Wheat-Based Diets for Pigs. *Agrociencia* **2010**, 44(7), 753-762.
102. Ha, S.; B. Park; S. Son; D. Ha; C.Y. Lee. Effects of the Low-Crude Protein and Lysine (Low Cp/Lys) Diet and a Yeast Culture Supplemented to the Low Cp/Lys Diet on Growth and Carcass Characteristics in Growing-Finishing Pigs. *J. Anim. Sci. Technol.* **2012**, 54(6), 427-433. doi:10.5187/JAST.2012.54.6.427
103. Wenner, B.A.; H.N. Zerby; D.D. Boler; W.A. Gebreyes; S.J. Moeller. Effect of Mannan Oligosaccharides (Bio-Mos) and Outdoor Access Housing on Pig Growth, Feed Efficiency and Carcass Composition. *J. Anim. Sci.* **2013**, 91(10), 4936-4944. doi:10.2527/jas.2013-6582

104. Edwards, M.V.; A.C. Edwards; P. Millard; A. Kocher. Mannose Rich Fraction of *Saccharomyces Cerevisiae* Promotes Growth and Enhances Carcass Yield in Commercially Housed Grower-Finisher Pigs. *Anim. Feed Sci. Technol.* **2014**, 197, 227-232. doi:10.1016/j.anifeedsci.2014.08.004
105. Lei, Y.; I.H. Kim. Effect of *Phaffia Rhodozyma* on Performance, Nutrient Digestibility, Blood Characteristics, and Meat Quality in Finishing Pigs. *J. Anim. Sci.* **2014**, 92(1), 171-176. doi:10.2527/jas.2013-6749
106. Szakacs, A.R.; S. Matei; L. Ștefănuț; Z. Moni; A. Macri. Effects of Pre and Probiotic on Growth Performance and Haematological Parameters in Pigs. *Bull. Univ. Agric. Sci. Vet. Med. Cluj. Napoca.* **2016**, 73(2), 295-300. doi:10.15835/buasvmcn-vm:12166
107. Gong, Y.L.; J.B. Liang; M.F. Jahromi; Y.B. Wu; A.G. Wright; X.D. Liao. Mode of Action of *Saccharomyces Cerevisiae* in Enteric Methane Mitigation in Pigs. *Animal* **2018**, 12(2), 239-245. doi:10.1017/S1751731117001732
108. Zhang, J.; J. Park; I. Kim. Effect of Supplementation with Brewer's Yeast Hydrolysate on Growth Performance, Nutrients Digestibility, Blood Profiles and Meat Quality in Growing to Finishing Pigs. *Asian Australas. J. Anim. Sci.* **2019**, 32(10), 1565-1572. doi:10.5713/ajas.18.0837
109. Bo, H.X.; H.T. Anh; P.X. Hao; P.T. Tuoi; D.D. Luc. Effects of Replacement of Fish Meal and Soybean Meal by Brewers' Yeast Extract on Growth and Feed Conversion of Landrace X Yorkshire Pigs. *Livest. Res. Rural. Dev.* **2020**, 32(6), 1-7.
110. Dávila-Ramírez, J.L.; M.R. Carvajal-Nolazco; M.J. López-Millanes; H. González-Ríos; H. Celaya-Michel; J. Sosa-Castañeda; S.M. Barrales-Heredia; S.F. Moreno-Salazar; M.A. Barrera-Silva. Effect of Yeast Culture (*Saccharomyces Cerevisiae*) Supplementation on Growth Performance, Blood Metabolites, Carcass Traits, Quality, and Sensorial Traits of Meat from Pigs under Heat Stress. *Anim. Feed Sci. Technol.* **2020**, 267. doi:10.1016/j.anifeedsci.2020.114573

111. He, W.; Y. Gao; Z. Guo; Z. Yang; X. Wang; H. Liu; H. Sun; B. Shi. Effects of Fermented Wheat Bran and Yeast Culture on Growth Performance, Immunity, and Intestinal Microflora in Growing-Finishing Pigs. *J. Anim. Sci.* **2021**, 99(11). doi:10.1093/jas/skab308
112. Mayorga, E.J.; S.K. Kvidera; E.A. Horst; M. Al-Qaisi; C.S. McCarthy; M.A. Abeyta; S. Lei; T.H. Elsasser; S. Kahl; T.G. Kiros; L.H. Baumgard. Effects of Dietary Live Yeast Supplementation on Growth Performance and Biomarkers of Metabolism and Inflammation in Heat-Stressed and Nutrient-Restricted Pigs. *Transl. Anim. Sci.* **2021**, 5(2). doi:10.1093/tas/txab072
113. Namted, S.; K. Pongpong; W. Loongyai; C. Rakangthong; C. Bunchasak. Improving Growth Performance and Blood Profile by Feeding Autolyzed Yeast to Improve Pork Carcass and Meat Quality. *Anim. Sci. J.* **2021**, 92(1). doi:10.1111/asj.13666
114. Lucas, I.A.M.; A.F.C. Calder. Antibiotics and a High Level of Copper Sulphate in Rations for Growing Bacon Pigs. *J. Agric. Sci.* **1957**, 49, 184-199. doi:10.1017/S0021859600036170
115. King, J.O.L. The Effect of Environmental Temperature on the Response of Growing Pigs to Dietary Supplements of an Antibiotic and Copper Sulphate. *Vet. Rec.* **1960**, 72, 304-306.
116. Wallace, H.D.; J.T. McCall; B. Bass; G.E. Combs. High Level Copper for Growing-Finishing Swine. *J. Anim. Sci.* **1960**, 19, 1153-1163. doi:10.2527/jas1960.1941153x
117. Bellis, D.B. Supplementation of Bacon Pig Rations by Aureomycin and Two Levels of Copper Sulphate. *Anim. Prod.* **1961**, 3(1), 89-95. doi:10.1017/S0003356100033808

118. Lucas, I.A.M.; R.M. Livingstone; I. McDonald. Copper Sulphate as a Growth Stimulant for Pigs: Effect of Level and Purity. *Anim. Prod.* **1961**, 3(2), 111-119. doi:10.1017/S0003356100033869
119. Barber, R.S.; R. Braude; K.G. Mitchell. Copper Sulphate and Molasses Distillers Dried Solubles as Dietary Supplements for Growing Pigs. *Anim. Prod.* **1962**, 4(2), 233-238. doi:10.1017/S0003356100034243
120. Braude, R.; M.J. Townsend; G. Harrington; J.G. Rowell. Effects of Oxytetracycline and Copper Sulphate, Separately and Together, in the Rations of Growing Pigs. *J. Agric. Sci.* **1962**, 58, 251-256. doi:10.1017/S0021859600010212
121. Lucas, I.A.M.; R.M. Livingstone; A.W. Boyne. Copper Sulphate as a Growth Stimulant for Pigs: Effect of Composition of Diet and Level of Protein. *Anim. Prod.* **1962**, 4(2), 177-183. doi:10.1017/S0003356100034176
122. Gipp, W.F.; W.G. Pond; S.E. Smith. Effects of Level of Dietary Copper, Molybdenum, Sulfate and Zinc on Bodyweight Gain, Hemoglobin and Liver Copper Storage of Growing Pigs. *J. Anim. Sci.* **1967**, 26(4), 727-30. doi:10.2527/jas1967.264727x
123. Barber, R.S.; R. Braude; K.G. Mitchell; J.D. Harding; G. Lewis; R.M. Loosmore. The Effects of Feeding Toxic Groundnut Meal to Growing Pigs and Its Interaction with High-Copper Diets. *Br. J. Nutr.* **1968**, 22(4), 535-54. doi:10.1079/bjn19680064
124. Hanrahan, T.J.; J.F. O'Grady. Copper Supplementation of Pig Diets. The Effect of Protein Level and Zinc Supplementation on the Response to Added Copper. *Anim. Prod.* **1968**, 10(4), 423-432. doi:10.1017/S0003356100026441
125. Boyazoglu, P.A.; E.L. Barrett. Effects of High Level Copper Supplementation on Growing-Finishing Pigs. *J. S. Afr. Vet. Med. Assoc.* **1970**, 41(3), 201-204.

126. Barber, R.S.; R. Braude; K.G. Mitchell. Arsanilic Acid, Sodium Salicylate and Bromide Salts as Potential Growth Stimulants for Pigs Receiving Diets with and without Copper Sulphate. *Br. J. Nutr.* **1971**, 25(3), 381-9. doi:10.1079/bjn19710103
127. DeGoey, L.W.; R.C. Wahlstrom; R.J. Emerick. Studies of High Level Copper Supplementation to Rations for Growing Swine. *J. Anim. Sci.* **1971**, 33(1), 52-57. doi:10.2527/jas1971.33152x
128. Kline, R.D.; V.W. Hays; G.L. Cromwell. Effects of Copper, Molybdenum and Sulfate on Performance, Hematology and Copper Stores of Pigs and Lambs. *J. Anim. Sci.* **1971**, 33(4), 771-779. doi:10.2527/jas1971.334771x
129. Kline, R.D.; V.W. Hays; G.L. Cromwell. Related Effects of Copper, Zinc and Iron on Performance, Hematology and Copper Stores of Pigs. *J. Anim. Sci.* **1972**, 34(3), 393-6. doi:10.2527/jas1972.343393x
130. Braude, R.; K. Ryder. Copper Levels in Diets for Growing Pigs. *J. Agric. Sci.* **1973**, 80(3), 489-493. doi:10.1017/S0021859600058135
131. Elliot, J.I.; M.A. Amer. Influence of Level of Copper Supplement and Removal of Supplemental Copper from the Diet on the Performance of Growing-Finishing Pigs and Accumulation of Copper in the Liver. *Can. J. Anim. Sci.* **1973**, 53(1), 133-138. doi:10.4141/cjas73-020
132. Gipp, W.F.; W.G. Pond; E.F. Walker, Jr. Influence of Diet Composition and Mode of Copper Administration on the Response of Growing-Finishing Swine to Supplemental Copper. *J. Anim. Sci.* **1973**, 36(1), 91-99. doi:10.2527/jas1973.36191x

133. Kline, R.D.; M.A. Corzo; V.W. Hays; G.L. Cromwell. Related Effects of Copper, Molybdenum and Sulfide on Performance, Hematology and Copper Stores of Growing Pigs. *J. Anim. Sci.* **1973**, 37(4), 936-941.  
doi:10.2527/jas1973.374936x
134. NCR-42 Committee on Swine Nutrition. Cooperative Regional Studies with Growing Swine: Effects of Vitamin E and Levels of Supplementary Copper During the Growing-Finishing Period on Gain, Feed Conversion and Tissue Copper Storage in Swine. *J. Anim. Sci.* **1974**, 39(3), 512-20. doi:10.2527/jas1974.393512x
135. Bellis, D.B. A Note on Copper Supplementation of Bacon Pig Diets Based on Fishmeal or on Extracted Soyabean Meal. *Rhod. J. Agric. Res.* **1975**, 13(1), 9-13.
136. Castell, A.G.; R.D. Allen; R.M. Beames; J.M. Bell; R. Belzile; J.P. Bowland; J.I. Elliot; M. Ihnat; E. Larmond; T.M. Mallard; D.T. Spurr; S.C. Stothers; S.B. Wilton; L.G. Young. Copper Supplementation of Canadian Diets for Growing-Finishing Pigs. *Can. J. Anim. Sci.* **1975**, 55(1), 113-134. doi:10.4141/cjas75-014
137. Hansen, V.; S. Bresson. Copper Sulphate as a Feed Additive to Bacon Pigs. *Acta Agric. Scand.* **1975**, 25(1), 30-32.
138. Omole, T.A.; J.O. Ilori; A.O. Leigh. Effects of Dietary Copper and Zinc on Performance Carcass Characteristics and Tissue Copper Stores of Market Pigs. *Malays. Agric. Res.* **1976**, 5(1), 67-73.
139. Barber, R.S.; R. Braude; K.G. Mitchell; R.J. Pittman. The Value of Virginiamycin (Eskalin) as a Feed Additive for Growing Pigs in Diets with or without a High Copper Supplement. *Anim. Prod.* **1978**, 26(2), 151-155.  
doi:10.1017/S0003356100039568
140. Cromwell, G.L.; V.W. Hays; T.L. Clark. Effects of Copper Sulfate, Copper Sulfide and Sodium Sulfide on Performance and Copper Stores of Pigs. *J. Anim. Sci.* **1978**, 46(3), 692-698. doi:10.2527/jas1978.463692x

141. Pond, W.G.; E.F. Walker Jr; D. Kirtland; T. Rounsaville. Effect of Dietary Ca, Cu and Zn Level on Body Weight Gain and Tissue Mineral Concentrations of Growing Pigs and Rats. *J. Anim. Sci.* **1978**, 47(5), 1128-1134.  
doi:10.2527/jas1978.4751128x
142. Eisemann, J.H.; W.G. Pond; M.L. Thonney. Effect of Dietary Zinc and Copper on Performance and Tissue Mineral and Cholesterol Concentrations in Swine. *J. Anim. Sci.* **1979**, 48(5), 1123-1128. doi:10.2527/jas1979.4851123x
143. Prince, T.J.; V.W. Hays; G.L. Cromwell. Effects of Copper Sulfate and Ferrous Sulfide on Performance and Liver Copper and Iron Stores of Pigs. *J. Anim. Sci.* **1979**, 49(2), 507-513. doi:10.2527/jas1979.492507x
144. Barber, R.S.; R. Braude; K.G. Mitchell. Copper Supplementation of Isonitrogenous Diets for Growing Pigs Containing White-Fish Meal or Soya Bean Meal as the Protein Supplement. *Anim. Prod.* **1981**, 33(1), 81-86.  
doi:10.1017/S000335610002523X
145. Ribeiro de Lima, F.; T.S. Stahly; G.L. Cromwell. Effects of Copper, with and without Ferrous Sulfide, and Antibiotics on the Performance of Pigs. *J. Anim. Sci.* **1981**, 52(2), 241-7. doi:10.2527/jas1981.522241x
146. Braude, R.; Z.D. Hosking. Copper in Diets for Growing Pigs. *J. Agric. Sci.* **1982**, 99(2), 365-371.  
doi:10.1017/S002185960003015X
147. Bradley, B.D.; G. Graber; R.J. Condon; L.T. Frobish. Effects of Graded Levels of Dietary Copper on Copper and Iron Concentrations in Swine Tissues. *J. Anim. Sci.* **1983**, 56(3), 625-30. doi:10.2527/jas1983.563625x
148. Prince, T.J.; V.W. Hays; G.L. Cromwell. Interactive Effects of Dietary Calcium, Phosphorus and Copper on Performance and Liver Stores of Pigs. *J. Anim. Sci.* **1984**, 58(2), 356-61. doi:10.2527/jas1984.582356x

149. Southern, L.L.; T.B. Stewart. Performance and Tissue Copper Concentrations of Control and *Ascaris Suum*-Infected Pigs Fed Excess Dietary Copper. *J. Parasitol.* **1984**, 70(5), 668-670. doi:10.2307/3281747
150. Rowan, T.G.; T.L.J. Lawrence. Growth, Tissue Deposition and Metabolism Studies in Growing Pigs Given Low Glucosinolate Rapeseed Meal Diets Containing Different Amounts of Copper and Polyethylene Glycol. *J. Agric. Sci.* **1986**, 107(3), 505-513. doi:10.1017/S0021859600069653
151. Astrup, H.N.; T. Matre. Feed Conversion, Pork Fat Softening and Liver Malondialdehyde Reactivity in Pigs Supplemented with Copper. *Norw. J. Agric. Sci.* **1987**, 1(2), 81-86.
152. Lüdke, H.; F. Schöne. Copper and Iodine in Pig Diets with High Glucosinolate Rapeseed Meal. I. Performance and Thyroid Hormone Status of Growing Pigs Fed on a Diet with Rapeseed Meal Treated with Copper Sulphate Solution or Untreated and Supplements of Iodine, Copper or a Quinoxaline Derivative. *Anim. Feed Sci. Technol.* **1988**, 22(1-2), 33-43. doi:10.1016/0377-8401(88)90072-7
153. Schöne, F.; H. Lüdke; A. Hennig; G. Jahreis. Copper and Iodine in Pig Diets with High Glucosinolate Rapeseed Meal. Ii. Influence of Iodine Supplements for Rations with Rapeseed Meal Untreated or Treated with Copper Ions on Performance and Thyroid Hormone Status of Growing Pigs. *Anim. Feed Sci. Technol.* **1988**, 22(1-2), 45-59. doi:10.1016/0377-8401(88)90073-9
154. Ward, T.L.; K.L. Watkins; L.L. Southern; P.G. Hoyt; D.D. French. Interactive Effects of Sodium Zeolite-a and Copper in Growing Swine: Growth, and Bone and Tissue Mineral Concentrations. *J. Anim. Sci.* **1991**, 69(2), 726-733. doi:10.2527/1991.692726x

155. Myer, R.O.; J.W. Lamkey; W.R. Walker; J.H. Brendemuhl; G.E. Combs. Performance and Carcass Characteristics of Swine When Fed Diets Containing Canola Oil and Added Copper to Alter the Unsaturated:Saturated Ratio of Pork Fat. *J. Anim. Sci.* **1992**, 70(5), 1417-1423. doi:10.2527/1992.7051417x
156. Southern, L.L.; K.L. Watkins; D.D. French. Effect of Dietary Sodium Bicarbonate on Growth, Liver Copper Concentration and Incidence of Gastric Ulceration in Pigs Fed Excess Dietary Copper. *Int. J. Vitam. Nutr. Res.* **1993**, 63(1), 45-47.
157. Apgar, G.A.; E.T. Kornegay. Mineral Balance of Finishing Pigs Fed Copper Sulfate or a Copper-Lysine Complex at Growth-Stimulating Levels. *J. Anim. Sci.* **1996**, 74(7), 1594-1600. doi:10.2527/1996.7471594x.
158. Lauridsen, C.; S. Højsgaard; M.T. Sørensen. Influence of Dietary Rapeseed Oil, Vitamin E, and Copper on the Performance and the Antioxidative and Oxidative Status of Pigs. *J. Anim. Sci.* **1999**, 77(4), 906-16. doi:10.2527/1999.774906x
159. Hernández, A.; J.R. Pluske; D.N. D'Souza; B.P. Mullan. Minimum Levels of Inclusion of Copper and Zinc Proteinate Amino Acid Chelates in Growing and Finishing Pig Diets. *Anim. Prod. Sci.* **2009**, 49(4), 340-349. doi:10.1071/EA08237
160. Coble, K.F.; J.M. DeRouchey; M.D. Tokach; S.S. Dritz; B.V. Lawrence; J. Escobar; J.C. Woodworth; R.D. Goodband; N. Boettger, *Effects of Copper Sources (Copper Sulfate and Mintrex Cu) on Growth Performance, Carcass Characteristics, Barn Cleaning, and Economics in Finishing Pigs*, in *Kansas State University Swine Day*. 2014, Kansas State University: Kansas. p. 155-163.
161. Feldpausch, J.A.; R.G. Amachawadi; M.D. Tokach; H.M. Scott; T.G. Nagaraja; S.S. Dritz; R.D. Goodband; J.C. Woodworth; J.M. DeRouchey. Effects of Dietary Copper, Zinc, and Ractopamine Hydrochloride on Finishing Pig

- Growth Performance, Carcass Characteristics, and Antimicrobial Susceptibility of Enteric Bacteria. *J. Anim. Sci.* **2016**, 94(8), 3278-3293. doi:10.2527/jas.2016-0340
162. Coble, K.F.; J.M. DeRouchey; M.D. Tokach; S.S. Dritz; R.D. Goodband; J.C. Woodworth; J.L. Usry. The Effects of Copper Source and Concentration on Growth Performance, Carcass Characteristics, and Pen Cleanliness in Finishing Pigs. *J. Anim. Sci.* **2017**, 95(9), 4052-4059. doi:10.2527/jas2017.1624
163. Coble, K.F.; D.D. Burnett; J.M. Derouchey; M.D. Tokach; J.M. Gonzalez; F. Wu; S.S. Dritz; R.D. Goodband; J.C. Woodworth; J.R. Pluske. Effect of Diet Type and Added Copper on Growth Performance, Carcass Characteristics, Energy Digestibility, Gut Morphology, and Mucosal Mrna Expression of Finishing Pigs. *J. Anim. Sci.* **2018**, 96(8), 3288-3301. doi:10.1093/jas/sky196
164. Coble, K.F.; F. Wu; J.M. DeRouchey; M.D. Tokach; S.S. Dritz; R.D. Goodband; J.C. Woodworth; J.L. Usry. Effect of Standardized Ileal Digestible Lysine and Added Copper on Growth Performance, Carcass Characteristics, and Fat Quality of Finishing Pigs. *J. Anim. Sci.* **2018**, 96(8), 3249-3263. doi:10.1093/jas/sky184
165. Carpenter, C.B.; J.C. Woodworth; J.M. Derouchey; M.D. Tokach; R.D. Goodband; S.S. Dritz; F. Wu; Z.J. Rambo. Effects of Increasing Copper from Either Copper Sulfate or Combinations of Copper Sulfate and a Copper-Amino Acid Complex on Finishing Pig Growth Performance and Carcass Characteristics. *Transl. Anim. Sci.* **2019**, 3(4), 1263-1269. doi:10.1093/tas/txz112
166. Seidu, A.; H. Meng; D. Che; H. Jiang; R. Han; B. Zhao; D. Kofi; G. Qin. Effect of Dietary Copper Levels on the Growth Performance and Nutrient Utilization in Fattening Pigs. *Indian J. Anim. Res* **2020**, 54(5), 573-577. doi:10.18805/ijar.B-956

167. Blavi, L.; D. Solà; A. Monteiro; J.F. Pérez; H.H. Stein. Inclusion of Dicopper Oxide Instead of Copper Sulfate in Diets for Growing-Finishing Pigs Results in Greater Final Body Weight and Bone Mineralization, but Reduced Accumulation of Copper in the Liver. *J. Anim. Sci.* **2021**, 99(6). doi:10.1093/jas/skab127
168. Wedekind, K.J.; A.J. Lewis; M.A. Giesemann; P.S. Miller. Bioavailability of Zinc from Inorganic and Organic Sources for Pigs Fed Corn-Soybean Meal Diets. *J. Anim. Sci.* **1994**, 72(10), 2681-9. doi:10.2527/1994.72102681x
169. RupiĆ, V.; L. Ivandija; S. Luterotti; M. Dominis-KramariĆ. Influence of Inorganic and Organic Dietary Zinc on Its Concentration in Blood Serum, Bones and Hair and on Catalytical Activity of Some Serum Enzymes in Pigs. *Acta Vet. Brno* **1997**, 66(2), 75-85. doi:10.2754/avb199766020075
170. Paulk, C.B.; M.D. Tokach; S.S. Dritz; J.M. Gonzalez; J.M. Derouchey; R.D. Goodband, *Effects of Added Zinc During the Grower and/or Finisher Phase on Growth Performance and Carcass Characteristics of Finishing Pigs Fed Diets with or without Ractopamine Hcl.*, in *Kansas State University Swine Day*. 2014, Kansas State University: Kansas. p. 164-171.
171. Holen, J.P.; Z. Rambo; A.M. Hilbrands; L.J. Johnston. Effects of Dietary Zinc Source and Concentration on Performance of Growing-Finishing Pigs Reared with Reduced Floor Space. *Prof. Anim. Sci.* **2018**, 34(2), 133-143. doi:10.15232/pas.2017-01684
172. Cemin, H.S.; C.B. Carpenter; J.C. Woodworth; M.D. Tokach; S.S. Dritz; J.M. DeRouchey; R.D. Goodband; J.L. Usry. Effects of Zinc Source and Level on Growth Performance and Carcass Characteristics of Finishing Pigs. *Transl. Anim. Sci.* **2019**, 3(2), 742-748. doi:10.1093/tas/txz071

173. Cemin, H.S.; J.C. Woodworth; M.D. Tokach; S.S. Dritz; J.M. DeRouchey; R.D. Goodband; J.L. Usry. Effects of Increasing Dietary Zinc on Growth Performance and Carcass Characteristics of Pigs Raised under Commercial Conditions. *Transl. Anim. Sci.* **2019**, 3(2), 731-736. doi:10.1093/tas/txz054
174. Villagómez-Estrada, S.; J.F. Pérez; S. van Kuijk; D. Melo-Durán; R. Karimirad; D. Solà-Oriol. Effects of Two Zinc Supplementation Levels and Two Zinc and Copper Sources with Different Solubility Characteristics on the Growth Performance, Carcass Characteristics and Digestibility of Growing-Finishing Pigs. *J. Anim. Physiol. Anim. Nutr. (Berl.)* **2021**, 105(1), 59-71. doi:10.1111/jpn.13447
175. Natalello, A.; H. Khelil-Arfa; G. Luciano; M. Zoon; R. Menci; M. Scerra; A. Blanchard; F. Mangano; L. Biondi; A. Priolo. Effect of Different Levels of Organic Zinc Supplementation on Pork Quality. *Meat Sci.* **2022**, 186. doi:10.1016/j.meatsci.2021.108731
176. Siljander-Rasi, H.; S. Peuranen; K. Tiihonen; E. Virtanen; H. Kettunen; T. Alaviuhkola; P.H. Simmins. Effect of Equimolar Dietary Betaine and Choline Addition on Performance, Carcass Quality and Physiological Parameters of Pigs. *Anim. Sci.* **2003**, 76(1), 55-62. doi:10.1017/s1357729800053315
177. Dunshea, F.R.; D.J. Cadogan; G.G. Partridge. Dietary Betaine and Ractopamine Combine to Increase Lean Tissue Deposition in Finisher Pigs, Particularly Gilts. *Anim. Prod. Sci.* **2009**, 49(1), 65-70. doi:10.1071/EA08014
178. Smith, J.W.; J.L. Nelssen; R.D. Goodband; M.D. Tokach; B.T. Richert; K.Q. Owen; J.R. Bergstrom; S.A. Blum, *The Effects of Supplementing Growing-Finishing Swine Diets with Betaine and (or) Choline on Growth and Carcass Characteristics*, in *Kansas State University Swine Day*. 1994, Kansas State University: Kansas. p. 162-164.

179. Smith, J.W.; K.Q. Owen; K.G. Friesen; J.L. Nelssen; R.D. Goodband; M.D. Tokach; T.T. Lohrmann; S.A. Blum, *The Effects of Supplemental Dietary Carnitine, Betaine, and Chromium Nicotinate on Growth and Carcass Characteristics in Growing-Finishing Swine*, in *Kansas State University Swine Day*. 1994, Kansas State University: Kansas. p. 158-161.
180. Matthews, J.O.; L.L. Southern; J.E. Pontif; A.D. Higbie; T.D. Bidner. Interactive Effects of Betaine, Crude Protein, and Net Energy in Finishing Pigs. *J. Anim. Sci.* **1998**, 76(9), 2444-2455. doi:10.2527/1998.7692444x
181. Øverland, M.; K.A. Rørvik; A. Skrede. Effect of Trimethylamine Oxide and Betaine in Swine Diets on Growth Performance, Carcass Characteristics, Nutrient Digestibility, and Sensory Quality of Pork. *J. Anim. Sci.* **1999**, 77(8), 2143-2153. doi:10.2527/1999.7782143x
182. Matthews, J.O.; L.L. Southern; T.D. Bidner; M.A. Persica. Effects of Betaine, Pen Space, and Slaughter Handling Method on Growth Performance, Carcass Traits, and Pork Quality of Finishing Barrows. *J. Anim. Sci.* **2001**, 79(4), 967-974. doi:10.2527/2001.794967x
183. Matthews, J.O.; L.L. Southern; A.D. Higbie; M.A. Persica; T.D. Bidner. Effects of Betaine on Growth, Carcass Characteristics, Pork Quality, and Plasma Metabolites of Finishing Pigs. *J. Anim. Sci.* **2001**, 79(3), 722-728. doi:10.2527/2001.793722x
184. Young, M.G.; S.S. Dritz; M.D. Tokach; R.D. Goodband; J.L. Nelssen, *The Influence of Dietary Energy Level on the Response to Betaine*, in *Kansas State University Swine Day*. 2001, Kansas State University: Kansas. p. 101-104.
185. Lawrence, B.V.; A.P. Schinckel; O. Adeola; K. Cera. Impact of Betaine on Pig Finishing Performance and Carcass Composition. *J. Anim. Sci.* **2002**, 80(2), 475-482. doi:10.2527/2002.802475x

186. Feng, J.; X. Liu; Y.Z. Wang; Z.R. Xu. Effects of Betaine on Performance, Carcass Characteristics and Hepatic Betaine-Homocysteine Methyltransferase Activity in Finishing Barrows. *Asian Australas. J. Anim. Sci.* **2006**, 19(3), 402-405. doi:10.5713/ajas.2006.402
187. Huang, Q.C.; X.Y. Han; Z.R. Xu; X.Y. Yang; T. Chen; X.T. Zheng. Betaine Suppresses Carnitine Palmitoyltransferase I in Skeletal Muscle but Not in Liver of Finishing Pigs. *Livest. Sci.* **2009**, 126(1-3), 130-135. doi:10.1016/j.livsci.2009.06.015
188. Nakev, J.; T. Popova; V. Vasileva. Influence of Dietary Betaine Supplementation on the Growth Performance and Carcass Characteristics in Male and Female Growing-Finishing Pigs. *Bulg. J. Agric. Sci.* **2009**, 15(3), 263-268.
189. Yang, H.S.; J.I. Lee; S.T. Joo; G.B. Park. Effects of Dietary Glycine Betaine on Growth and Pork Quality of Finishing Pigs. *Asian Australas. J. Anim. Sci.* **2009**, 22(5), 706-711. doi:10.5713/ajas.2009.80645
190. Van Heugten, E., *Improving Production Efficiency and Carcass Weight of Finishing Pigs Housed under Heat Stress Conditions by Heat Abatement with Dietary Betaine*. 2014, North Carolina State University.
191. Madeira, M.S.; C.M. Alfaia; P. Costa; P.A. Lopes; S.V. Martins; J.P. Lemos; O. Moreira; J. Santos-Silva; R.J. Bessa; J.A. Prates. Effect of Betaine and Arginine in Lysine-Deficient Diets on Growth, Carcass Traits, and Pork Quality. *J. Anim. Sci.* **2015**, 93(10), 4721-33. doi:10.2527/jas.2015-9117
192. Wang, L.S.; Z. Shi; R. Gao; B.C. Su; H. Wang; B.M. Shi; A.S. Shan. Effects of Conjugated Linoleic Acid or Betaine on the Growth Performance and Fatty Acid Composition in Backfat and Belly Fat of Finishing Pigs Fed Dried Distillers Grains with Solubles. *Animal* **2015**, 9(4), 569-575. doi:10.1017/S1751731114002699
193. Lothong, M.; K. Tachampa; P. Assavacheep; K. Angkanaporn. Effects of Dietary Betaine Supplementation on Back Fat Thickness and Serum Igf-1 in Late Finishing Pigs. *Thai. J. Vet. Med* **2016**, 46(3), 427-434.

194. Mendoza, S.M.; R.D. Boyd; C.E. Zier-Rush; P.R. Ferket; K.D. Haydon; E.v. Heugten. Effect of Natural Betaine and Ractopamine Hcl on Whole-Body and Carcass Growth in Pigs Housed under High Ambient Temperatures. *J. Anim. Sci.* **2017**, 95(7), 3047-3056. doi:10.2527/jas.2017.1622
195. Groesbeck, C.N.; M.D. Tokach; R.D. Goodband; S.S. Dritz; J.L. Nelssen; K.R. Lawrence; F. Valdez. Influence of Chromium Source on Plasma Non-Esterified Fatty Acid Concentrations in Growing-Finishing Pigs. *Kansas State University Swine Day* **2004**, 154-157.
196. Lindemann, M.D.; C.M. Wood; A.F. Harper; E.T. Kornegay; R.A. Anderson. Dietary Chromium Picolinate Additions Improve Gain:Feed and Carcass Characteristics in Growing-Finishing Pigs and Increase Litter Size in Reproducing Sows. *J. Anim. Sci.* **1995**, 73(2), 457-465. doi:10.2527/1995.732457x
197. O'Quinn, P.R.; J.W. Smith, II; J.L. Nelssen; M.D. Tokach; R.D. Goodband; K.Q. Owen; S.A. Blum, *Effects of Source and Level of Added Chromium on Growth Performance and Carcass Characteristics of Growing-Finishing Pigs*, in *Kansas State University Swine Day*. 1998, Kansas State University: Kansas. p. 166-171.
198. Page, T.G.; L.L. Southern; T.L. Ward; D.L. Thompson Jr. Effect of Chromium Picolinate on Growth and Serum and Carcass Traits of Growing-Finishing Pigs. *J. Anim. Sci.* **1993**, 71(3), 656-662. doi:10.2527/1993.713656x
199. Shelton, J.L.; R.L. Payne; S.L. Johnston; T.D. Bidner; L.L. Southern; R.L. Odgaard; T.G. Page. Effect of Chromium Propionate on Growth, Carcass Traits, Pork Quality, and Plasma Metabolites in Growing-Finishing Pigs. *J. Anim. Sci.* **2003**, 81(10), 2515-2524. doi:10.2527/2003.81102515x.

200. Tian, Y.; L. Gong; J. Xue; J. Cao; L. Zhang. Effects of Graded Levels of Chromium Methionine on Performance, Carcass Traits, Meat Quality, Fatty Acid Profiles of Fat, Tissue Chromium Concentrations, and Antioxidant Status in Growing-Finishing Pigs. *Biol. Trace Elem. Res.* **2015**, 168(1), 110-121. doi:10.1007/s12011-015-0352-1
201. Lindemann, M.D.; G.L. Cromwell; H.J. Monegue; K.W. Purser. Effect of Chromium Source on Tissue Concentration of Chromium in Pigs. *J. Anim. Sci.* **2008**, 86(11), 2971-2978. doi:10.2527/jas.2008-0888
202. Sales, J.; F. Jančík. Effects of Dietary Chromium Supplementation on Performance, Carcass Characteristics, and Meat Quality of Growing-Finishing Swine: A Meta-Analysis. *J. Anim. Sci.* **2011**, 89(12), 4054-4067. doi:10.2527/jas.2010-3495
203. Boleman, S.L.; S.J. Boleman; T.D. Bidner; L.L. Southern; T.L. Ward; J.E. Pontif; M.M. Pike. Effect of Chromium Picolinate on Growth, Body Composition, and Tissue Accretion in Pigs. *J. Anim. Sci.* **1995**, 73(7), 2033-2042. doi:10.2527/1995.7372033x
204. Mooney, K.W.; G.L. Cromwell. Effects of Dietary Chromium Picolinate Supplementation on Growth, Carcass Characteristics, and Accretion Rates of Carcass Tissues in Growing-Finishing Swine. *J. Anim. Sci.* **1995**, 73(11), 3351-3357. doi:10.2527/1995.73113351x
205. Smith, J.W., II; J.L. Nelssen; R.D. Goodband; M.D. Tokach; B.T. Richert; K.Q. Owen; J.R. Bergstrom; W.B. Nessmith, Jr.; S.A. Blum, *The Effects of Supplementing Growing-Finishing Pig Diets with Carnitine and(or) Chromium on Growth and Carcass Characteristics*, in *Kansas State University Swine Day*. 1996, Kansas State University: Kansas. p. 111-115.
206. Kornegay, E.T.; Z. Wang; C.M. Wood; M.D. Lindemann. Supplemental Chromium Picolinate Influences Nitrogen Balance, Dry Matter Digestibility, and Carcass Traits in Growing-Finishing Pigs. *J. Anim. Sci.* **1997**, 75(5), 1319-1323. doi:10.2527/1997.7551319x

207. Min, J.K.; W.Y. Kim; B.J. Chae; I.B. Chung; I.S. Shin; Y.J. Choi; I.K. Han. Effects of Chromium Picolinate (Crp) on Growth Performance, Carcass Characteristics and Serum Traits in Growing-Finishing Pigs. *Asian Australas. J. Anim. Sci.* **1997**, 10(1), 8-14. doi:10.5713/ajas.1997.8
208. Mooney, K.W.; G.L. Cromwell. Efficacy of Chromium Picolinate and Chromium Chloride as Potential Carcass Modifiers in Swine. *J. Anim. Sci.* **1997**, 75(10), 2661-2671. doi:10.2527/1997.75102661x.
209. Ward, T.L.; L.L. Southern; T.D. Bidner. Interactive Effects of Dietary Chromium Tripicolinate and Crude Protein Level in Growing-Finishing Pigs Provided Inadequate and Adequate Pen Space. *J. Anim. Sci.* **1997**, 75(4), 1001-1008. doi:10.2527/1997.7541001x
210. Lien, T.; C. Wu; B. Lin; B. Wang; J. Lu; T. Shiao. Effect of Different Protein and Limiting Amino Acid Levels Coupled with a Supplement of Chromium Picolinate on Lipid Metabolism and Carcass Characteristics of Pigs. *Anim. Sci.* **1998**, 67(3), 601-607. doi:10.1017/S135772980003304X
211. Lemme, A.; G. Wenk; M. Lindemann; G. Bee. Chromium Yeast Affects Growth Performance but Not Whole Carcass Composition of Growing-Finishing Pigs. *Ann. Zootech.* **1999**, 48(6), 457-468. doi:10.1051/animres:19990605
212. Mooney, K.W.; G.L. Cromwell. Efficacy of Chromium Picolinate on Performance and Tissue Accretion in Pigs with Different Lean Gain Potential. *J. Anim. Sci.* **1999**, 77(5), 1188-1198. doi:10.2527/1999.7751188x
213. O'Quinn, P.R.; A.T. Waylan; R.D. Goodband; J.A. Unruh; J.L. Nelssen; J.C. Woodworth; M.D. Tokach; K.Q. Owen, *Effects of Modified Tall Oil, Chromium Nicotinate, and L-Carnitine on Growth Performance and Carcass Characteristics of Growing-Finishing Gilts*, in *Kansas State University Swine Day*. 1999, Kansas State University: Kansas. p. 123-128.

214. Hanczakowska, E.; J. Urbańczyk; M. Świątkiewicz. The Efficiency of Betaine and Organic Compounds of Chromium in Fattening of Pigs with Ad Libitum or Restricted Feeding. *Rocz. Nauk. Zootech.* **1999**, 26(4), 263-274.
215. Matthews, J.O.; L.L. Southern; J.M. Fernandez; J.E. Pontif; T.D. Bidner; R.L. Odgaard. Effect of Chromium Picolinate and Chromium Propionate on Glucose and Insulin Kinetics of Growing Barrows and on Growth and Carcass Traits of Growing-Finishing Barrows. *J. Anim. Sci.* **2001**, 79(8), 2172-2178. doi:10.2527/2001.7982172x.
216. Xi, G.; Z. Xu; S. Wu; S. Chen. Effect of Chromium Picolinate on Growth Performance, Carcass Characteristics, Serum Metabolites and Metabolism of Lipid in Pigs. *Asian Australas. J. Anim. Sci.* **2001**, 14(2), 258-262.  
doi:10.5713/ajas.2001.258
217. Matthews, J.O.; A.D. Higbie; L.L. Southern; D.F. Coombs; T.D. Bidner; R.L. Odgaard. Effect of Chromium Propionate and Metabolizable Energy on Growth, Carcass Traits, and Pork Quality of Growing-Finishing Pigs. *J. Anim. Sci.* **2003**, 81(1), 191-196. doi:10.2527/2003.811191x.
218. Waylan, A.T.; P.R. O'Quinn; R.D. Goodband; J.A. Unruh; J.L. Nelssen; J.C. Woodworth; M.D. Tokach. Effects of Dietary Additions of Modified Tall Oil, Chromium Nicotinate, and L-Carnitine on Growth Performance, Carcass Characteristics, and Bacon Characteristics of Growing-Finishing Pigs. *Can. J. Anim. Sci.* **2003**, 83(3), 459-467.  
doi:10.4141/A02-036
219. Wang, M.Q.; Z.R. Xu. Effect of Chromium Nanoparticle on Growth Performance, Carcass Characteristics, Pork Quality and Tissue Chromium in Finishing Pigs. *Asian Australas. J. Anim. Sci.* **2004**, 17(8), 1118-1122.  
doi:10.5713/ajas.2004.1118

220. Matthews, J.O.; A.C. Guzik; F.M. LeMieux; L.L. Southern; T.D. Bidner. Effects of Chromium Propionate on Growth, Carcass Traits, and Pork Quality of Growing-Finishing Pigs. *J. Anim. Sci.* **2005**, 83(4), 858-862.  
  
doi:10.2527/2005.834858x.
221. Amoikon, K.E.; T.L. Ward; L.L. Southern. Effects of Dietary Chromium Tripicolinate and Lysine on Growth Performance, Carcass Traits and Plasma Metabolite Levels in Pigs. *Agron. Afr.* **2006**, 18(1), 75-83.  
  
doi:10.4314/aga.v18i1.1681
222. Khajareern, J.; S. Khajareern; H.D. Ashmead; S.D. Ashmead. The Effect of Chromium Bisglycinate-Nicotinamide Chelate Supplementation on Growth and Carcass Quality in Growing and Finishing Pigs. *Int. J. Appl. Res. Vet. Med.* **2006**, 4(3), 193-199.
223. Bergstrom, J.R.; M.D. Tokach; S.S. Dritz; J.L. Nelssen; J.M. DeRouchey; R.D. Goodband. Effects of 200 Ppb Added Chromium from Chromium Propionate on the Growth Performance and Carcass Characteristics of Finishing Pigs. *Kansas Agricultural Experiment Station Research Reports* **2008**, 226-230. doi:10.4148/2378-5977.7061
224. Wang, M.Q.; Y.D. He; Z.R. Xu; W.F. Li. Effects of Chromium Picolinate Supplementation on Growth Hormone Secretion and Pituitary Mrna Expression in Finishing Pigs. *Asian Australas. J. Anim. Sci.* **2008**, 21(7), 1033-1037.  
  
doi:10.5713/ajas.2008.70692
225. Jackson, A.R.; S. Powell; S.L. Johnston; J.O. Matthews; T.D. Bidner; F.R. Valdez; L.L. Southern. The Effect of Chromium as Chromium Propionate on Growth Performance, Carcass Traits, Meat Quality, and the Fatty Acid Profile of Fat from Pigs Fed No Supplemented Dietary Fat, Choice White Grease, or Tallow. *J. Anim. Sci.* **2009**, 87(12), 4032-4041. doi:10.2527/jas.2009-2168

226. Park, J.K.; J.Y. Lee; B.J. Chae; S.J. Ohh. Effects of Different Sources of Dietary Chromium on Growth, Blood Profiles and Carcass Traits in Growing-Finishing Pigs. *Asian Australas. J. Anim. Sci.* **2009**, *22*(11), 1547-1554.  
  
doi:10.5713/ajas.2009.80633
227. Wang, M.Q.; Y.D. He; M.D. Lindemann; Z.G. Jiang. Efficacy of Cr (Iii) Supplementation on Growth, Carcass Composition, Blood Metabolites, and Endocrine Parameters in Finishing Pigs. *Asian Australas. J. Anim. Sci.* **2009**, *22*(10), 1414-1419. doi:10.5713/ajas.2009.90111
228. Wang, M.Q.; Z.R. Xu; W.F. Li; Z.G. Jiang. Effect of Chromium Nanocomposite Supplementation on Growth Hormone Pulsatile Secretion and Mrna Expression in Finishing Pigs. *J. Anim. Physiol. Anim. Nutr. (Berl.)* **2009**, *93*(4), 520-525.  
  
doi:10.1111/j.1439-0396.2008.00836.x
229. Li, Y.S.; N.H. Zhu; P.P. Niu; F.X. Shi; C.L. Hughes; G.X. Tian; R.H. Huang. Effects of Dietary Chromium Methionine on Growth Performance, Carcass Composition, Meat Colour and Expression of the Colour-Related Gene Myoglobin of Growing-Finishing Pigs. *Asian Australas. J. Anim. Sci.* **2013**, *26*(7), 1021-1029. doi:10.5713/ajas.2013.13012.
230. Panaite, T.; A. Untea; R.D. Criste; C. Papuc; M. Ropota; N.C. Predescu. Effect of the Dietary Chrome Picolinate Supplements Given to Fattening Pigs on the Quality Parameters of the Pig Leg. *Lucrări Științifice - Universitatea de Științe Agricole și Medicină Veterinară, Seria Zootehnie* **2013**, *59*, 66-71.
231. Hung, T.; B.J. Leury; M.A. Sabin; C.L. Collins; F.R. Dunshea. Dietary Nano-Chromium Tripicolinate Increases Feed Intake and Decreases Plasma Cortisol in Finisher Gilts During Summer. *Trop. Anim. Health Prod.* **2014**, *46*(8), 1483-1489. doi:10.1007/s11250-014-0673-7

232. Peres, L.M.; A.M. Bridi; C.A.d. Silva; N. Andreo; C.C.P. Barata; J.G.N. Dário. Effect of Supplementing Finishing Pigs with Different Sources of Chromium on Performance and Meat Quality. *Rev. Bras. Zootec.* **2014**, 43(7), 369-375. doi:10.1590/S1516-35982014000700005
233. Wang, M.Q.; C. Wang; Y.J. Du; H. Li; W.J. Tao; S.S. Ye; Y.D. He; S.Y. Chen. Effects of Chromium-Loaded Chitosan Nanoparticles on Growth, Carcass Characteristics, Pork Quality, and Lipid Metabolism in Finishing Pigs. *Livest. Sci.* **2014**, 161, 123-129. doi:10.1016/j.livsci.2013.12.029
234. Li, T.Y.; C.M. Fu; T.F. Lien. Effects of Nanoparticle Chromium on Chromium Absorbability, Growth Performance, Blood Parameters and Carcass Traits of Pigs. *Anim. Prod. Sci.* **2017**, 57(6), 1193-1200. doi:10.1071/AN15142
235. Marcolla, C.S.; D.M. Holanda; S.V. Ferreira; G.C. Rocha; N.V.L. Serão; M.S. Duarte; M.L.T. Abreu; A. Saraiva. Chromium, Cla, and Ractopamine for Finishing Pigs. *J. Anim. Sci.* **2017**, 95(10), 4472-4480. doi:10.2527/jas2017.1753
236. Xu, X.; L. Liu; S. Long; X. Piao; T.L. Ward; F. Ji. Effects of Chromium Methionine Supplementation with Different Sources of Zinc on Growth Performance, Carcass Traits, Meat Quality, Serum Metabolites, Endocrine Parameters, and the Antioxidant Status in Growing-Finishing Pigs. *Biol. Trace Elem. Res.* **2017**, 179(1), 70-78. doi:10.1007/s12011-017-0935-0
237. Jin, C.; Q. Wang; Z. Zhang; Y. Xu; H. Yan; H. Li; C. Gao; X. Wang. Dietary Supplementation with Pioglitazone Hydrochloride and Chromium Methionine Improves Growth Performance, Meat Quality, and Antioxidant Ability in Finishing Pigs. *J. Agric. Food. Chem.* **2018**, 66(17), 4345-4351. doi:10.1021/acs.jafc.8b01176
238. Gebhardt, J.T.; J.C. Woodworth; M.D. Tokach; J.M. Derouchey; R.D. Goodband; J.A. Loughmiller; A.L.P. De Souza; M.J. Rincker; S.S. Dritz. Determining the Influence of Chromium Propionate and Yucca Schidigera on Growth

Performance and Carcass Composition of Pigs Housed in a Commercial Environment. *Transl. Anim. Sci.* **2019**, 3(4), 1275-1285. doi:10.1093/tas/txz117

239. Gebhardt, J.T.; J.C. Woodworth; M.D. Tokach; J.M. DeRouchey; R.D. Goodband; J.A. Loughmiller; A.L.P.d. Souza; S.S. Dritz. Influence of Chromium Propionate Dose and Feeding Regimen on Growth Performance and Carcass Composition of Pigs Housed in a Commercial Environment. *Transl. Anim. Sci.* **2019**, 3(1), 384-392. doi:10.1093/tas/txy104

240. Lien, T.F.; Y.S. Lan. Effects of Nanoparticle Chromium Mixed with  $\Gamma$ -Polyglutamic Acid on the Chromium Bioavailability, Growth Performance, Serum Parameters and Carcass Traits of Pigs. *Anim. Prod. Sci.* **2019**, 59(12), 2222-2229. doi:10.1071/AN18441

241. Mayorga, E.J.; S.K. Kvidera; J.T. Seibert; E.A. Horst; M. Abuajamieh; M. Al-Qaisi; S. Lei; J.W. Ross; C.D. Johnson; B. Kremer; L. Ochoa; R.P. Rhoads; L.H. Baumgard. Effects of Dietary Chromium Propionate on Growth Performance, Metabolism, and Immune Biomarkers in Heat-Stressed Finishing Pigs. *J. Anim. Sci.* **2019**, 97(3), 1185-1197. doi:10.1093/jas/sky484

242. da Silva, J.L.; A.P. Dos Santos; T.V.A. Farias; C. Kiefer; K.M.R. de Souza Nascimento; A. Corassa; S.A. da Silva Alencar; G.P. Rodrigues. Chromium and Energy Restriction as Substitutes for Ractopamine in Finishing Gilts Diet. *Cienc. Rural* **2021**, 52(2). doi:10.1590/0103-8478cr20200736

243. Santos, A.P.; M.D. Tokach; C. Kiefer; R.D. Goodband; J.C. Woodworth; J.M. Derouchey; S.S. Dritz; J.T. Gebhardt. Effects of Dietary Chromium Propionate and Space Allowance on Performance and Carcass Responses of Growing-Finishing Pigs. *Transl. Anim. Sci.* **2021**, 5(3). doi:10.1093/tas/txab112

244. Alencar, S.A.D.S.; D.S. Lima; A.P. Dos Santos; C. Kiefer; K.M.R.S. Nascimento; A. Corassa; J.L. da Silva; T.V.A. Farias. Yeast Chromium and Digestible Lysine Levels in Finishing Pigs Subjected to High Ambient Temperatures. *Cienc. Rural* **2022**, 52(3). doi:10.1590/0103-8478cr20200753
245. Wang, L.; Y. Huang; Y. Wang; T. Shan. Effects of Polyunsaturated Fatty Acids Supplementation on the Meat Quality of Pigs: A Meta-Analysis. *Front. Nutr.* **2021**, 8, 746765. doi:10.3389/fnut.2021.746765
246. Dugan, M.E.R.; J.L. Aalhus; A.L. Schaefer; J.K.G. Kramer. The Effect of Conjugated Linoleic Acid on Fat to Lean Repartitioning and Feed Conversion in Pigs. *Can. J. Anim. Sci.* **1997**, 77(4), 723-725. doi:10.4141/A97-084
247. Ostrowska, E.; M. Muralitharan; R.F. Cross; D.E. Bauman; F.R. Dunshea. Dietary Conjugated Linoleic Acids Increase Lean Tissue and Decrease Fat Deposition in Growing Pigs. *J. Nutr.* **1999**, 129(11), 2037-2042. doi:10.1093/jn/129.11.2037
248. O'Quinn, P.R.; J.L. Nelssen; R.D. Goodband; J.A. Unruh; J.C. Woodworth; J.S. Smith; M.D. Tokach. Effects of Modified Tall Oil Versus a Commercial Source of Conjugated Linoleic Acid and Increasing Levels of Modified Tall Oil on Growth Performance and Carcass Characteristics of Growing-Finishing Pigs. *J. Anim. Sci.* **2000**, 78(9), 2359-2368. doi:10.2527/2000.7892359x.
249. Bee, G. Dietary Conjugated Linoleic Acids Affect Tissue Lipid Composition but Not De Novo Lipogenesis in Finishing Pigs. *Anim. Res.* **2001**, 50(5), 383-399. doi:10.1051/animres:2001114
250. Eggert, J.M.; M.A. Belury; A. Kempa-Steczko; S.E. Mills; A.P. Schinckel. Effects of Conjugated Linoleic Acid on the Belly Firmness and Fatty Acid Composition of Genetically Lean Pigs. *J. Anim. Sci.* **2001**, 79(11), 2866-2872. doi:10.2527/2001.79112866x

251. Dugan, M.E.R.; J.L. Aalhus; K.A. Lien; A.L. Schaefer; J.K.G. Kramer. Effects of Feeding Different Levels of Conjugated Linoleic Acid and Total Oil to Pigs on Live Animal Performance and Carcass Composition. *Can. J. Anim. Sci.* **2001**, 81(4), 505-510. doi:10.4141/A00-101
252. Thiel-Cooper, R.L.; F.C. Parrish Jr; J.C. Sparks; B.R. Wiegand; R.C. Ewan. Conjugated Linoleic Acid Changes Swine Performance and Carcass Composition. *J. Anim. Sci.* **2001**, 79(7), 1821-1828. doi:10.2527/2001.7971821x
253. Wiegand, B.R.; F.C. Parrishx Jr; J.E. Swan; S.T. Larsen; T.J. Baas. Conjugated Linoleic Acid Improves Feed Efficiency, Decreases Subcutaneous Fat, and Improves Certain Aspects of Meat Quality in Stress-Genotype Pigs. *J. Anim. Sci.* **2001**, 79(8), 2187-2195. doi:10.2527/2001.7982187x
254. Barowicz, T.; M. Pieszka; M. Pietras; W. Migdał; W. Kędzior. Conjugated Linoleic Acid Utilization for Improvement of Chemical Composition and Dietetic Value of Pork Meat. *Ann. Anim. Sci.* **2002**, 2(2), 123-130.
255. Dunshea, F.R.; E. Ostrowska; B. Luxford; R.J. Smits; R.G. Campbell; D.N. D'Souza; B.P. Mullan. Dietary Conjugated Linoleic Acid Can Decrease Backfat in Pigs Housed under Commercial Conditions. *Asian Australas. J. Anim. Sci.* **2002**, 15(7), 1011-1017. doi:10.5713/ajas.2002.1011
256. Tischendorf, F.; F. Schöne; U. Kirchheim; G. Jahreis. Influence of a Conjugated Linoleic Acid Mixture on Growth, Organ Weights, Carcass Traits and Meat Quality in Growing Pigs. *J. Anim. Physiol. Anim. Nutr. (Berl.)* **2002**, 86(3/4), 117-128. doi:10.1046/j.1439-0396.2002.00366.x
257. Wiegand, B.R.; J.C. Sparks; F.C. Parrish Jr; D.R. Zimmerman. Duration of Feeding Conjugated Linoleic Acid Influences Growth Performance, Carcass Traits, and Meat Quality of Finishing Barrows. *J. Anim. Sci.* **2002**, 80(3), 637-643. doi:10.2527/2002.803637x

258. Ostrowska, E.; D. Suster; M. Muralitharan; R.F. Cross; B.J. Leury; D.E. Bauman; F.R. Dunshea. Conjugated Linoleic Acid Decreases Fat Accretion in Pigs: Evaluation by Dual-Energy X-Ray Absorptiometry. *Br. J. Nutr.* **2003**, 89(2), 219-229. doi:10.1079/BJN2002765
259. Sun, D.; X. Zhu; S. Qiao; S. Fan; D. Li. Effects of Conjugated Linoleic Acid Levels and Feeding Intervals on Performance, Carcass Traits and Fatty Acid Composition of Finishing Barrows. *Arch. Anim. Nutr.* **2004**, 58(4), 277-286. doi:10.1080/00039420412331273286
260. Barowicz, T.; M. Pieszka; M.P. Pietras; W. Migdal. Influence of Dietary Conjugated Linoleic Acid on Lipid Metabolism and Serum Leptin Concentrations in Finishing Pigs. *Biotechnol. Anim. Husb.* **2005**, 21(5/6), 119-122. doi:10.2298/BAH0502119B
261. Lauridsen, C.; H. Mu; P. Henckel. Influence of Dietary Conjugated Linoleic Acid (Cla) and Age at Slaughtering on Performance, Slaughter- and Meat Quality, Lipoproteins, and Tissue Deposition of Cla in Barrows. *Meat Sci.* **2005**, 69(3), 393-399. doi:10.1016/j.meatsci.2004.08.009
262. Weber, T.E.; B.T. Richert; M.A. Belury; Y. Gu; K. Enright; A.P. Schinckel. Evaluation of the Effects of Dietary Fat, Conjugated Linoleic Acid, and Ractopamine on Growth Performance, Pork Quality, and Fatty Acid Profiles in Genetically Lean Gilts. *J. Anim. Sci.* **2006**, 84(3), 720-732. doi:10.2527/2006.843720x.
263. Bee, G.; S. Jacot; G. Guex; C. Biolley. Effects of Two Supplementation Levels of Linseed Combined with Cla or Tallow on Meat Quality Traits and Fatty Acid Profile of Adipose and Different Muscle Tissues in Slaughter Pigs. *Animal* **2008**, 2(5), 800-811. doi:10.1017/S175173110800181X

264. Corino, C.; M. Musella; G. Pastorelli; R. Rossi; K. Paolone; L. Costanza; A. Manchisi; G. Maiorano. Influences of Dietary Conjugated Linoleic Acid (Cla) and Total Lysine Content on Growth, Carcass Characteristics and Meat Quality of Heavy Pigs. *Meat Sci.* **2008**, 79(2), 307-316. doi:10.1016/j.meatsci.2007.10.001
265. Martin, D.; E. Muriel; E. Gonzalez; J. Viguera; J. Ruiz. Effect of Dietary Conjugated Linoleic Acid and Monounsaturated Fatty Acids on Productive, Carcass and Meat Quality Traits of Pigs. *Livest. Sci.* **2008**, 117(2/3), 155-164. doi:10.1016/j.livsci.2007.12.005
266. White, H.M.; B.T. Richert; J.S. Radcliffe; A.P. Schinckel; J.R. Burgess; S.L. Koser; S.S. Donkin; M.A. Latour. Feeding Conjugated Linoleic Acid Partially Recovers Carcass Quality in Pigs Fed Dried Corn Distillers Grains with Solubles. *J. Anim. Sci.* **2009**, 87(1), 157-166. doi:10.2527/jas.2007-0734
267. Jiang, Z.Y.; W.J. Zhong; C.T. Zheng; Y.C. Lin; L. Yang; S.Q. Jiang. Conjugated Linoleic Acid Differentially Regulates Fat Deposition in Backfat and Longissimus Muscle of Finishing Pigs. *J. Anim. Sci.* **2010**, 88(5), 1694-1705. doi:10.2527/jas.2008-1551
268. Han, X.F.; F.J. Feng; J.P. Yu; S.X. Tang; M.A. Bamikole; Z.L. Tan; B. Zeng; C.S. Zhou; M. Wang. Effects of Conjugated Linoleic Acid Supplementation on Growth, Carcass Characteristics and Fatty Acid Profiles of Muscle and Fat in Growing-Finishing Pigs. *J. Anim. Feed Sci.* **2011**, 20(2), 171-185. doi:10.22358/jafs/66169/2011
269. Lee, J.; K. Cha; B. Chae; S. Ohh. Supplementation of Either Conjugated Linoleic Acid or  $\Gamma$ -Linolenic Acid with or without Carnitine to Pig Diet Affect Flavor of Pork and Neutrophil Phagocytosis. *J. Anim. Sci. Technol.* **2011**, 53(3), 237-252. doi:10.5187/JAST.2011.53.3.237

270. Barnes, K.M.; N.R. Winslow; A.G. Shelton; K.C. Hlusko; M.J. Azain. Effect of Dietary Conjugated Linoleic Acid on Marbling and Intramuscular Adipocytes in Pork. *J. Anim. Sci.* **2012**, 90(4), 1142-1149. doi:10.2527/jas.2011-4642
271. Go, G.W.; G.Y. Wu; D.T. Silvey; S.H. Choi; X.L. Li; S.B. Smith. Lipid Metabolism in Pigs Fed Supplemental Conjugated Linoleic Acid and/or Dietary Arginine. *Amino Acids* **2012**, 43(4), 1713-1726. doi:10.1007/s00726-012-1255-5
272. Martinez-Aispuro, M.; J.L. Figueroa-Velasco; V. Zamora-Zamora; M.T. Sanchez-Torres; M.E. Ortega-Cerrilla; J.L. Cordero-Mora; A. Ruiz-Flores; S.S. Gonzalez-Muñoz. Effect of Fatty Acids Source on Growth Performance, Carcass Characteristics, Plasma Urea Nitrogen Concentration, and Fatty Acid Profile in Meat of Pigs Fed Standard- or Low-Protein Diets. *Span. J. Agric. Res* **2012**, 10(4), 993-1004. doi:10.5424/sjar/2012104-323-11
273. Rickard, J.W.; B.R. Wiegand; D. Pompeu; R.B. Hinson; G.D. Gerlemann; R. Disselhorst; M.E. Briscoe; H.L. Evans; G.L. Allee. The Effect of Corn Distiller's Dried Grains with Solubles, Ractopamine, and Conjugated Linoleic Acid on the Carcass Performance, Meat Quality, and Shelf-Life Characteristics of Fresh Pork Following Three Different Storage Methods. *Meat Sci.* **2012**, 90(3), 643-652. doi:10.1016/j.meatsci.2011.10.007
274. Pompeu, D.; B.R. Wiegand; H.L. Evans; J.W. Rickard; G.D. Gerlemann; R.B. Hinson; S.N. Carr; M.J. Ritter; R.D. Boyd; G.L. Allee. Effect of Corn Dried Distillers Grains with Solubles, Conjugated Linoleic Acid, and Racto-Pamine (Paylean) on Growth Performance and Fat Characteristics of Late Finishing Pigs. *J. Anim. Sci.* **2013**, 91(2), 793-803. doi:10.2527/jas.2012-5257
275. Tous, N.; R. Lizardo; B. Vilà; M. Gispert; M. Font-i-Furnols; E. Esteve-Garcia. Effect of a High Dose of Cla in Finishing Pig Diets on Fat Deposition and Fatty Acid Composition in Intramuscular Fat and Other Fat Depots. *Meat Sci.* **2013**, 93(3), 517-524. doi:10.1016/j.meatsci.2012.10.005

276. Martínez-Aispuro, M.; J.L. Figueroa-Velasco; V. Zamora-Zamora; J.L. Cordero-Mora; C. Narciso-Gaytán; M.T. Sánchez-Torres; S. Carrillo-Domínguez; R.M. Castillo-Domínguez. Effect of Cla Supplementation to Low-Protein Diets on the Growth Performance, Carcass Characteristics, Plasma Urea Nitrogen Concentration, and Fatty Acid Profile in the Meat of Pigs. *Braz. Arch. Biol. Technol.* **2014**, 57(5). doi:10.1590/S1516-8913201401407
277. Upadhaya, S.D.; H. Yun; S. Huang; I. Kim. Efficacy of Dietary Supplementation of Fatty Acid Compound on Performance and Production in Finishing Pigs. *Trop. Anim. Health Prod.* **2017**, 49(6), 1281-1288. doi:10.1007/s11250-017-1326-4
278. Panisson, J.C.; A. Maiorka; S.G. Oliveira; A. Saraiva; M.S. Duarte; K.F. Silva; E.V. Santos; R.L.S. Tolentino; I.M.G. Lopes; L.L.M. Guedes; B.A.N. Silva. Effect of Ractopamine and Conjugated Linoleic Acid on Performance of Late Finishing Pigs. *Animal* **2020**, 14(2), 277-284. doi:10.1017/S1751731119001708
279. Averette Gatlin, L.; M.T. See; D.K. Larick; X. Lin; J. Odle. Conjugated Linoleic Acid in Combination with Supplemental Dietary Fat Alters Pork Fat Quality. *J. Nutr.* **2002**, 132(10), 3105-3112. doi:10.1093/jn/131.10.3105
280. Corino, C.; S. Magni; G. Pastorelli; R. Rossi; J. Mourot. Effect of Conjugated Linoleic Acid on Meat Quality, Lipid Metabolism, and Sensory Characteristics of Dry-Cured Hams from Heavy Pigs. *J. Anim. Sci.* **2003**, 81(9), 2219-2229. doi:10.2527/2003.8192219x.
281. Corino, C.; A. Di Giancamillo; R. Rossi; C. Domeneghini. Dietary Conjugated Linoleic Acid Affects Morphofunctional and Chemical Aspects of Subcutaneous Adipose Tissue in Heavy Pigs. *J. Nutr.* **2005**, 135(6), 1444-50. doi:10.1093/jn/135.6.1444

282. Ostrowska, E.; R.F. Cross; R.D. Warner; M. Muralitharan; D.E. Bauman; F.R. Dunshea. Dietary Conjugated Linoleic Acid Improves Carcass Leanness without Altering Meat Quality in the Growing Pig. *Aust. J. Exp. Agric.* **2005**, 45(6), 691-697. doi:10.1071/EA04144
283. Rossi, R.; G. Pastorelli; M. Musella; C. Corino. Influence of Dietary Conjugated Linoleic Acid (Cla) and L-Lysine on Heavy Pigs Performances and Meat Quality. *Ital. J. Anim. Sci.* **2005**, 4(Supplement 2), 464-466. doi:10.4081/ijas.2005.2s.464
284. Cechova, M.; Z. Hadas; R. Beckova; L. Sladek; M. Rychetska. Changes in the Fattening Capacity and Carcass Value of Pigs Receiving the Cla Preparation. *Res. Pig Breed.* **2009**, 3.
285. Larsen, S.T.; B.R. Wiegand; F.C. Parrish Jr; J.E. Swan; J.C. Sparks. Dietary Conjugated Linoleic Acid Changes Belly and Bacon Quality from Pigs Fed Varied Lipid Sources. *J. Anim. Sci.* **2009**, 87(1), 285-295. doi:10.2527/jas.2008-1213
286. Cechova, M.; R. Beckova; Z. Hadas; E. Vaclavkova; M. Rychetska. Effect of Cla and Sunflower Oil in Pig Diet on Carcass Value Traits and Meat Quality. *Res. Pig Breed.* **2010**, 4(1).
287. Cordero, G.; B. Isabel; D. Menoyo; A. Daza; J. Morales; C. Piñeiro; C.J. Lopez-Bote. Dietary Cla Supplementation and Gender Modify Fatty Acid Composition of Subcutaneous and Intramuscular Fat in Iberian × Duroc Finishing Heavy Pigs. *Span. J. Agric. Res* **2010**, 8(4), 962-970. doi:10.5424/sjar/2010084-1244
288. Cordero, G.; B. Isabel; D. Menoyo; A. Daza; J. Morales; C. Piñeiro; C.J. López-Bote. Dietary Cla Alters Intramuscular Fat and Fatty Acid Composition of Pig Skeletal Muscle and Subcutaneous Adipose Tissue. *Meat Sci.* **2010**, 85(2), 235-239. doi:10.1016/j.meatsci.2010.01.004

289. Bothma, C.; A. Hugo; G. Osthoff; C.C. Joubert; J.C. Swarts; H.L.d. Kock. Effect of Dietary Conjugated Linoleic Acid Supplementation on the Technological Quality of Backfat of Pigs. *Meat Sci.* **2014**, 97(2), 277-286.  
  
doi:10.1016/j.meatsci.2014.02.002
290. James, B.W.; M.D. Tokach; R.D. Goodband; J.L. Nelssen; S.S. Dritz; K.Q. Owen; J.C. Woodworth; R.C. Sulabo. Interactive Effects of Dietary Ractopamine Hcl and L-Carnitine on Finishing Pigs: I. Growth Performance. *J. Anim. Sci.* **2013**, 91(7), 3265-3271. doi:10.2527/jas.2011-4286
291. Meng, Q.; S. Sun; Y. Sun; J. Li; D. Wu; A. Shan; B. Shi; B. Cheng. Effects of Dietary Lecithin and L-Carnitine on Fatty Acid Composition and Lipid-Metabolic Genes Expression in Subcutaneous Fat and Longissimus Thoracis of Growing-Finishing Pigs. *Meat Sci.* **2018**, 136, 68-78. doi:10.1016/j.meatsci.2017.10.012
292. Ying, W.; M.D. Tokach; J.M. DeRouchey; T.E. Houser; S.S. Dritz; R.D. Goodband; J.L. Nelssen. Effects of Dietary L-Carnitine and Dried Distillers Grains with Solubles on Growth, Carcass Characteristics, and Loin and Fat Quality of Growing-Finishing Pigs. *J. Anim. Sci.* **2013**, 91(7), 3211-3219. doi:10.2527/jas.2012-5606
293. Ringseis, R.; J. Keller; K. Eder. Basic Mechanisms of the Regulation of L-Carnitine Status in Monogastrics and Efficacy of L-Carnitine as a Feed Additive in Pigs and Poultry. *J. Anim. Physiol. Anim. Nutr. (Berl.)* **2018**, 102(6), 1686-1719.  
  
doi:10.1111/jpn.12959
294. Owen, K.Q.; H. Jit; C.V. Maxwell; J.L. Nelssen; R.D. Goodband; M.D. Tokach; G.C. Tremblay; S.I. Koo. Dietary L-Carnitine Suppresses Mitochondrial Branched-Chain Keto Acid Dehydrogenase Activity and Enhances Protein Accretion and Carcass Characteristics of Swine. *J. Anim. Sci.* **2001**, 79(12), 3104-12. doi:10.2527/2001.79123104x

295. Owen, K.Q.; J.L. Nelssen; R.D. Goodband; M.D. Tokach; K.G. Friesen. Effect of Dietary L-Carnitine on Growth Performance and Body Composition in Nursery and Growing-Finishing Pigs. *J. Anim. Sci.* **2001**, 79(6), 1509-1515. doi:10.2527/2001.7961509x
296. Bertol, T.M.; M. Ellis; D.N. Hamilton; M.J. Ritter. Effects of Dietary Supplementation with L-Carnitine and Fat on Blood Acid-Base Responses to Handling in Slaughter Weight Pigs. *J. Anim. Sci.* **2005**, 83(1), 75-81. doi:10.2527/2005.83175x
297. Han, Y.K.; P.A. Thacker. Effects of L-Carnitine, Selenium-Enriched Teast, Jujube Fruit and Hwangto (Red Clay) Supplementation on Performance and Carcass Measurements of Finishing Pigs. *Asian Australas. J. Anim. Sci.* **2006**, 19(2), 217-223. doi:10.5713/ajas.2006.217
298. Chen, Y.J.; I.H. Kim; J.H. Cho; J.S. Yoo; Q. Wang; Y. Wang; Y. Huang. Evaluation of Dietary L-Carnitine or Garlic Powder on Growth Performance, Dry Matter and Nitrogen Digestibilities, Blood Profiles and Meat Quality in Finishing Pigs. *Anim. Feed Sci. Technol.* **2008**, 141(1/2), 141-152. doi:10.1016/j.anifeedsci.2007.05.025
299. Pietruszka, A.; E. Jacyno; A. Kolodziej; M. Kawęcka; C. Elzanowski; B. Matysiak. Effects of L-Carnitine and Iron Diet Supplementations on Growth Performance, Carcass Characteristics and Blood Metabolites in Fattening Pigs. *Agric. Food Sci.* **2009**, 18(1), 27-34. doi:10.2137/145960609788066816
300. James, B.W.; M.D. Tokach; R.D. Goodband; J.L. Nelssen; S.S. Dritz; K.Q. Owen; J.C. Woodworth; R.C. Sulabo. Effects of Dietary L-Carnitine and Ractopamine Hcl on the Metabolic Response to Handling in Finishing Pigs. *J. Anim. Sci.* **2013**, 91(9), 4426-4439. doi:10.2527/jas.2011-4411

301. James, B.W.; M.D. Tokach; R.D. Goodband; J.L. Nelssen; S.S. Dritz; K.Q. Owen; J.C. Woodworth; R.C. Sulabo. Interactive Effects of Dietary Ractopamine Hcl and L-Carnitine on Finishing Pigs: Ii. Carcass Characteristics and Meat Quality. *J. Anim. Sci.* **2013**, 91(7), 3272-3282. doi:10.2527/jas.2011-4287
302. Aranda-Aguirre, E.; L.E. Robles-Jimenez; J. Osorio-Avalos; E. Vargas-Bello-Pérez; M. Gonzalez-Ronquillo. A Systematic-Review on the Role of Exogenous Enzymes on the Productive Performance at Weaning, Growing and Finishing in Pigs. *Vet. Anim. Sci.* **2021**, 14, 100195. doi:10.1016/j.vas.2021.100195
303. Kiarie, E.G.; S. Steelman; M. Martinez; K. Livingston. Significance of Single B-Mannanase Supplementation on Performance and Energy Utilization in Broiler Chickens, Laying Hens, Turkeys, Sows, and Nursery-Finish Pigs: A Meta-Analysis and Systematic Review. *Transl. Anim. Sci.* **2021**, 5(4), txab160. doi:10.1093/tas/txab160
304. Thacker, P.A.; G.L. Campbell; J.W.D. GrootWassink. The Effect of Beta-Glucanase Supplementation on the Performance of Pigs Fed Hulless Barley. *Nutr. Rep. Int.* **1988**, 38(1), 91-99.
305. Baas, T.C.; P.A. Thacker. Impact of Gastric Ph on Dietary Enzyme Activity and Survivability in Swine Fed B-Glucanase Supplemented Diets. *Can. J. Anim. Sci.* **1996**, 76(2), 245-252. doi:10.4141/cjas96-03
306. Flis, M.; W. Sobotka; Z. Zduńczyk. Replacement of Soyabean Meal by White Lupin Cv. Bardo Seeds and the Effectiveness of B-Glucanase and Xylanase in Growing-Finishing Pig Diets. *J. Anim. Feed Sci.* **1998**, 7(3), 301-312. doi:10.22358/jafs/69305/1998
307. O'Doherty, J.V.; S. Forde. The Effect of Protease and A-Galactosidase Supplementation on the Nutritive Value of Peas for Growing and Finishing Pigs. *Irish J. Agric. Food Res.* **1999**, 38(2), 217-226.

308. Thacker, P.A.; G.L. Campbell. Performance of Growing/Finishing Pigs Fed Untreated or Micronized Hulless Barley-Based Diets with or without B-Glucanase. *J. Anim. Feed Sci.* **1999**, 8(2), 157-170. doi:10.22358/jafs/68833/1999
309. Mavromichalis, I.; J.D. Hancock; B.W. Senne; T.L. Gugle; G.A. Kennedy; R.H. Hines; C.L. Wyatt. Enzyme Supplementation and Particle Size of Wheat in Diets for Nursery and Finishing Pigs. *J. Anim. Sci.* **2000**, 78(12), 3086-3095. doi:10.2527/2000.78123086x.
310. Grandhi, R.R. Effect of Dietary Ideal Amino Acid Ratios, and Supplemental Carbohydrase in Hulless-Barley-Based Diets on Pig Performance and Nitrogen Excretion in Manure. *Can. J. Anim. Sci.* **2001**, 81(1), 125-132. doi:10.4141/A00-064
311. Pettey, L.A.; S.D. Carter; B.W. Senne; J.A. Shriver. Effects of Beta-Mannanase Addition to Corn-Soybean Meal Diets on Growth Performance, Carcass Traits, and Nutrient Digestibility of Weanling and Growing-Finishing Pigs. *J. Anim. Sci.* **2002**, 80(4), 1012-9. doi:10.2527/2002.8041012x
312. Park, J.S.; I.H. Kim; J.D. Hancock; R.H. Hines; C. Cobb; H. Cao; J.W. Hong; O.S. Kwon. Effects of Amylase and Cellulase Supplementation in Sorghum-Based Diets for Finishing Pigs. *Asian Australas. J. Anim. Sci.* **2003**, 16(1), 70-76. doi:10.5713/ajas.2003.70
313. Park, J.S.; I.H. Kim; J.D. Hancock; C.L. Wyatt; K.C. Behnke; G.A. Kennedy. Effects of Expander Processing and Enzyme Supplementation of Wheat-Based Diets for Finishing Pigs. *Asian Australas. J. Anim. Sci.* **2003**, 16(2), 248-256. doi:10.5713/ajas.2003.248

314. Flis, M.; W. Sobotka. Fine Particle Size and Enzyme Supplementation as Factors Improving Utilization of Protein from Diets with Lowered Protein Contents by Pigs. *J. Anim. Feed Sci.* **2005**, 14(Suppl.1), 341-344.  
doi:10.22358/jafs/70574/2005
315. Thacker, P.A. Effect of Xylanase and Protease on the Performance of Growing-Finishing Pigs Fed Corn-Based Diets. *J. Appl. Anim. Res.* **2005**, 28(1), 17-23. doi:10.1080/09712119.2005.9706781
316. Thacker, P.A.; B.G. Rossnagel. Effect of Enzyme Supplementation on the Performance of Growing-Finishing Pigs Fed Diets Containing Normal or High Fat Oats. *J. Anim. Vet. Adv.* **2005**, 4(4), 484-490. doi:javaa.2005.484.490
317. Thacker, P.A.; B.G. Rossnagel. Performance of Growing-Finishing Pigs Fed Diets Containing Normal or Low Lignin-High Fat Oat Supplemented or Unsupplemented with Enzyme. *J. Anim. Vet. Adv.* **2005**, 4(7), 681-687.  
doi:javaa.2005.681.687
318. Kim, S.W.; J.H. Zhang; K.T. Soltwedel; D.A. Knabe. Use of Carbohydrases in Corn-Soybean Meal Based Grower-Finisher Pig Diets. *Anim. Res.* **2006**, 55(6), 563-578. doi:10.1051/animres:2006039
319. Roşu, M.; C. Falcă. The Effect of Swine Intake Supplementation with Biozyme X 1000 Upon Some Sanguine and Bioproductive Parameters. *Bulletin of University of Agricultural Sciences and Veterinary Medicine Cluj-Napoca. Veterinary Medicine* **2007**, 64(1/2), 283-286.
320. Świątkiewicz, M.; E. Hanczakowska. Effect of Herbs Mixture and Enzymes Supplementation of a Grass Silage Diet for Pigs on Performance and Meat Quality. *Med. Weter.* **2008**, 64(6), 782-785.

321. Wang, J.P.; S.M. Hong; L. Yan; J.S. Yoo; J.H. Lee; H.D. Jang; H.J. Kim; I.H. Kim. Effects of Single or Carbohydrases Cocktail in Low-Nutrient-Density Diets on Growth Performance, Nutrient Digestibility, Blood Characteristics, and Carcass Traits in Growing-Finishing Pigs. *Livest. Sci.* **2009**, 126(1/3), 215-220. doi:10.1016/j.livsci.2009.07.003
322. Widyaratne, G.P.; J.F. Patience; R.T. Zijlstra. Effect of Xylanase Supplementation of Diets Containing Wheat Distiller's Dried Grains with Solubles on Energy, Amino Acid and Phosphorus Digestibility and Growth Performance of Grower-Finisher Pigs. *Can. J. Anim. Sci.* **2009**, 89(1), 91-95. doi:10.4141/CJAS08103
323. Jacela, J.Y.; S.S. Dritz; J.M. DeRouchey; M.D. Tokach; R.D. Goodband; J.L. Nelssen. Effects of Supplemental Enzymes in Diets Containing Distillers Dried Grains with Solubles on Finishing Pig Growth Performance. *Prof. Anim. Sci.* **2010**, 26(4), 412-424. doi:10.15232/S1080-7446(15)30623-9
324. Yoon, S.Y.; Y.X. Yang; P.L. Shinde; J.Y. Choi; J.S. Kim; Y.W. Kim; K. Yun; J.K. Jo; J.H. Lee; S.J. Ohh; I.K. Kwon; B.J. Chae. Effects of Mannanase and Distillers Dried Grain with Solubles on Growth Performance, Nutrient Digestibility, and Carcass Characteristics of Grower-Finisher Pigs. *J. Anim. Sci.* **2010**, 88(1), 181-191. doi:10.2527/jas.2008-1741
325. Barnes, J.A.; J.M. DeRouchey; M.D. Tokach; R.D. Goodband; S.S. Dritz; J.L. Nelssen. Effects of Xylanase in Growing-Finishing Diets Varying in Dietary Energy and Fiber on Growth Performance, Carcass Characteristics, and Nutrient Digestibility. *Kansas Agricultural Experiment Station Research Reports* **2011**, 0(10), 227-239. doi:10.4148/2378-5977.7124
326. Hanczakowska, E.; M. Świątkiewicz; I. Kühn. Efficiency and Dose Response of Xylanase in Diets for Fattening Pigs. *Ann. Anim. Sci.* **2012**, 12(4), 539-548. doi:10.2478/v10220-012-0045-z

327. Jo, J.K.; S.L. Ingale; J.S. Kim; Y.W. Kim; K.H. Kim; J.D. Lohakare; J.H. Lee; B.J. Chae. Effects of Exogenous Enzyme Supplementation to Corn- and Soybean Meal-Based or Complex Diets on Growth Performance, Nutrient Digestibility, and Blood Metabolites in Growing Pigs. *J. Anim. Sci.* **2012**, 90(9), 3041-3048. doi:10.2527/jas.2010-3430
328. McAlpine, P.O.; C.J. O'Shea; P.F. Varley; J.V. O'Doherty. The Effect of Protease and Xylanase Enzymes on Growth Performance and Nutrient Digestibility in Finisher Pigs. *J. Anim. Sci.* **2012**, 90(Suppl. 4), 375-377. doi:10.2527/jas.53979
329. Cho, J.H.; I.H. Kim. Effects of Beta Mannanase and Xylanase Supplementation in Low Energy Density Diets on Performances, Nutrient Digestibility, Blood Profiles and Meat Quality in Finishing Pigs. *Asian J. Anim. Vet. Adv.* **2013**, 8(4), 622-630. doi:10.3923/ajava.2013.622.630
330. Kim, K.; J. Cho; I. Kim. Effects of Dietary Carbohydrases on Growth Performance, Nutrient Digestibility and Blood Characteristics in Finishing Pigs. *J. Anim. Sci. Technol.* **2013**, 55(4), 289-293. doi:10.5187/JAST.2013.55.4.289
331. Lipiński, K.; H. Skórko-Sajko; C. Purwin; Z. Antoszkiewicz; M. Werpachowski. Effect of Xylanase Supplementation to Cereal-Based Diets on Apparent Fecal Digestibility and Growth Performance of Pigs. *Ann. Anim. Sci.* **2013**, 13(2), 303-311. doi:10.2478/aoas-2013-0011
332. O'Shea, C.J.; P.O. Mc Alpine; P. Solan; T. Curran; P.F. Varley; A.M. Walsh; J.V.O. Doherty. The Effect of Protease and Xylanase Enzymes on Growth Performance, Nutrient Digestibility, and Manure Odour in Grower-Finisher Pigs. *Anim. Feed Sci. Technol.* **2014**, 189, 88-97. doi:10.1016/j.anifeedsci.2013.11.012
333. Villca, B.; R. Lizardo; J. Broz; J. Brufau; D. Torrallardona. Effect of a Carbohydrase Enzyme Complex on the Nutrient Apparent Total Tract Digestibility of Rye-Based Diets Fed to Growing-Finishing Pigs under Liquid Feeding. *J. Anim. Sci.* **2016**, 94(7), 230-233. doi:10.2527/jas2015-9747

334. Lindemann, M., *An Integrated Evaluation of the Nutrient Uplift Provided by Xylanase in Finishing*. 2016, University of Kentucky.
335. Nguyen, D.H.; K.Y. Lee; H.N. Tran; S.D. Upadhaya; Y.J. Jeong; I.H. Kim. Influence of Enterococcus Faecium and Endo-1,4-B-Xylanase Supplementation on Growth Performance, Nutrient Digestibility, Fecal Microflora, Fecal Gas Emission, and Meat Quality in Finishing Pigs Fed with Diets Based on Corn-Soybean Meal. *Can. J. Anim. Sci.* **2018**, 98(1), 126-134. doi:10.1139/cjas-2016-0197
336. Torres-Pitarch, A.; U.M. McCormack; V.E. Beattie; E. Magowan; G.E. Gardiner; A.M. Pérez-Vendrell; D. Torrallardona; J.V. O'Doherty; P.G. Lawlor. Effect of Phytase, Carbohydrase, and Protease Addition to a Wheat Distillers Dried Grains with Solubles and Rapeseed Based Diet on in Vitro Ileal Digestibility, Growth, and Bone Mineral Density of Grower-Finisher Pigs. *Livest. Sci.* **2018**, 216, 94-99. doi:10.1016/j.livsci.2018.07.003
337. Smit, M.N.; X. Zhou; J.L. Landero; M.G. Young; E. Beltranena. Increasing Hybrid Rye Level Substituting Wheat Grain with or without Enzyme on Growth Performance and Carcass Traits of Growing-Finishing Barrows and Gilts. *Transl. Anim. Sci.* **2019**, 3(4), 1561-1574. doi:10.1093/tas/txz141
338. Jang, J.C.; D.H. Kim; J.S. Hong; Y.D. Jang; Y.Y. Kim. Effects of Copra Meal Inclusion Level in Growing- Finishing Pig Diets Containing B-Mannanase on Growth Performance, Apparent Total Tract Digestibility, Blood Urea Nitrogen Concentrations and Pork Quality. *Animals* **2020**, 10(10), 1-12. doi:10.3390/ani10101840
339. Jang, J.C.; K.H. Kim; D.H. Kim; S.K. Jang; J.S. Hong; P.S. Heo; Y.Y. Kim. Effects of Increasing Levels of Palm Kernel Meal Containing B-Mannanase to Growing-Finishing Pig Diets on Growth Performance, Nutrient Digestibility, and Pork Quality. *Livest. Sci.* **2020**, 238. doi:10.1016/j.livsci.2020.104041

340. Torres-Pitarch, A.; G.E. Gardiner; P. Cormican; M. Rea; F. Crispie; J.V. O'Doherty; P. Cozannet; T. Ryan; J. Cullen; P.G. Lawlor. Effect of Cereal Fermentation and Carbohydrase Supplementation on Growth, Nutrient Digestibility and Intestinal Microbiota in Liquid-Fed Grow-Finishing Pigs. *Sci. Rep.* **2020**, 10(1), 13716. doi:10.1038/s41598-020-70443-x
341. Torres-Pitarch, A.; G.E. Gardiner; P. Cormican; M. Rea; F. Crispie; J.V. O'Doherty; P. Cozannet; T. Ryan; P.G. Lawlor. Effect of Cereal Soaking and Carbohydrase Supplementation on Growth, Nutrient Digestibility and Intestinal Microbiota in Liquid-Fed Grow-Finishing Pigs. *Sci Rep* **2020**, 10(1), 1023. doi:10.1038/s41598-020-57668-6
342. Kpogo, A.L.; J. Jose; J.C. Panisson; A.K. Agyekum; B.Z. Predicala; A.C. Alvarado; J.M. Agnew; C.J. Sprenger; A.D. Beaulieu. Greenhouse Gases and Performance of Growing Pigs Fed Wheat-Based Diets Containing Wheat Millrun and a Multi-Carbohydrase Enzyme. *J. Anim. Sci.* **2021**, 99(10). doi:10.1093/jas/skab213
343. Reyna, L.; J.L. Figueroa; V. Zamora; J.L. Cordero; M.T. Sánchez-Torres; M. Cuca. Addition of Protease to Standard Diet or Low Protein, Amino Acid Supplemented, Sorghum-Soyabean Meal Diets for Growing-Finishing Pigs. *J. Anim. Vet. Adv.* **2006**, 5(12), 1202-1208. doi:javaa.2006.1202.1208
344. Stephenson, E.W.; J.M. DeRouchey; J. Escobar; J.C. Woodworth; M.D. Tokach; R.D. Goodband; S.S. Dritz, *Effects of a Novel Protease Enzyme (Cibenza Dp100) on Finishing Pig Growth Performance and Carcass Characteristics*, in *Kansas State University Swine Day*. 2014, Kansas State University: Kansas. p. 69-76.
345. Upadhaya, S.D.; H.M. Yun; I.H. Kim. Influence of Low or High Density Corn and Soybean Meal-Based Diets and Protease Supplementation on Growth Performance, Apparent Digestibility, Blood Characteristics and Noxious Gas Emission of Finishing Pigs. *Anim. Feed Sci. Technol.* **2016**, 216, 281-287. doi:10.1016/j.anifeedsci.2016.04.003

346. Choe, J.; K.S. Kim; H.B. Kim; S. Park; J. Kim; S. Kim; B. Kim; S.H. Cho; J.Y. Cho; I.H. Park; J.H. Cho; M. Song. Effects of Protease on Growth Performance and Carcass Characteristics of Growing-Finishing Pigs. *S. Afr. J. Anim. Sci.* **2017**, 47(5), 697-703. doi:10.4314/sajas.v47i5.13
347. Lei, X.; J. Cheong; J. Park; I. Kim. Supplementation of Protease, Alone and in Combination with Fructooligosaccharide to Low Protein Diet for Finishing Pigs. *Anim. Sci. J.* **2017**, 88(12), 1987-1993. doi:10.1111/asj.12849
348. Nguyen, D.H.; S.I. Lee; J.Y. Cheong; I.H. Kim. Influence of Low-Protein Diets and Protease and Bromelain Supplementation on Growth Performance, Nutrient Digestibility, Blood Urine Nitrogen, Creatinine, and Faecal Noxious Gas in Growing-Finishing Pigs. *Can. J. Anim. Sci.* **2018**, 98(3), 488-497. doi:10.1139/cjas-2016-0116
349. Figueroa, J.L.; J.A. Martinez; M.T. Sanchez-Torres; J.L. Cordero; M. Martinez; V.M. Valdez; A. Ruiz. Evaluation of Reduced Amino Acids Diets Added with Protected Protease on Productive Performance in 25-100 Kg Barrows. *Austral J. Vet. Sci.* **2019**, 51(2), 53-60. doi:10.4067/S0719-81322019000200053
350. Liu, X.; J. Yin; I. Kim. Effect of Protease Derived from *Pseudoalteromonas Arctica* Supplementation on Growth Performance, Nutrient Digestibility, Meat Quality, Noxious Gas Emission and Blood Profiles in Finishing Pigs. *J. Anim. Physiol. Anim. Nutr. (Berl.)* **2019**, 103(6), 1926-1933. doi:10.1111/jpn.13202
351. Min, Y.; Y. Choi; Y. Kim; Y. Jeong; D. Kim; J. Kim; H. Jung; M. Song. Effects of Protease Supplementation on Growth Performance, Blood Constituents, and Carcass Characteristics of Growing-Finishing Pigs. *J. Anim. Sci. Technol.* **2019**, 61(4), 234-238. doi:10.5187/jast.2019.61.4.234

352. Lee, J.; J. Choe; J. Kang; J. Cho; S. Park; R. Perez-Maldonado; J. Cho; I. Park; H. Kim; M. Song. Dietary Protease Improves Growth Rate and Protein Digestibility of Growing-Finishing Pigs. *J. Anim. Sci. Technol.* **2020**, 62(3), 313-320. doi:10.5187/jast.2020.62.3.313
353. Kim, Y.J.; J.H. Lee; T.H. Kim; M.H. Song; W. Yun; H.J. Oh; J.S. Lee; H.B. Kim; J.H. Cho. Effect of Low Protein Diets Added with Protease on Growth Performance, Nutrient Digestibility of Weaned Piglets and Growingfinishing Pigs. *J. Anim. Sci. Technol.* **2021**, 63(3), 491-500. doi:10.5187/jast.2021.e49
354. Perez-Palencia, J.Y.; R.S. Samuel; C.L. Levesque. Supplementation of Protease to Low Amino Acid Diets Containing Superdose Level of Phytase for Wean-to-Finish Pigs: Effects on Performance, Postweaning Intestinal Health and Carcass Characteristics. *Transl. Anim. Sci.* **2021**, 5(2). doi:10.1093/tas/txab088
355. Cromwell, G.L.; T.S. Stahly; R.D. Coffey; H.J. Monegue; J.H. Randolph. Efficacy of Phytase in Improving the Bioavailability of Phosphorus in Soybean Meal and Corn-Soybean Meal Diets for Pigs. *J. Anim. Sci.* **1993**, 71(7), 1831-1840. doi:10.2527/1993.7171831x
356. Cromwell, G.L.; R.D. Coffey; H.J. Monegue; J.H. Randolph. Efficacy of Low-Activity, Microbial Phytase in Improving the Bioavailability of Phosphorus in Corn-Soybean Meal Diets for Pigs. *J. Anim. Sci.* **1995**, 73(2), 449-456. doi:10.2527/1995.732449x
357. Helander, E.; K. Partanen. Effects of Phosphorus Level and Microbial Phytase Supplementation on the Performance and Bone Mineralization in Pigs. *Acta Agric. Scand.* **1997**, 47(3), 159-167. doi:10.1080/09064709709362382
358. O'Doherty, J.V.; S. Forde; J.J. Callan. The Use of Microbial Phytase in Grower and Finisher Pig Diets. *Irish J. Agric. Food Res.* **1999**, 38(2), 227-239.

359. Gebert, S.; G. Bee; H.P. Pfirter; C. Wenk. Growth Performance and Nutrient Utilisation as Influenced in Pigs by Microbial Phytase and Vitamin E Supplementation to a Diet of High Oxidative Capacity. *Ann. Zootech.* **1999**, 48(2), 105-115. doi:10.1051/animres:19990203
360. Gagné, F.; J.J. Matte; G. Barnett; C. Pomar. The Effect of Microbial Phytase and Feed Restriction on Protein, Fat and Ash Deposition in Growing-Finishing Pigs. *Can. J. Anim. Sci.* **2002**, 82(4), 551-558. doi:10.4141/A01-076
361. Brady, S.M.; J.J. Callan; D. Cowan; M. McGrane; J.V. O'Doherty. Effect of Phytase Inclusion and Calcium/Phosphorus Ratio on the Performance and Nutrient Retention of Grower-Finisher Pigs Fed Barley/Wheat/Soya Bean Meal-Based Diets. *J. Sci. Food Agric.* **2002**, 82(15), 1780-1790. doi:10.1002/jsfa.1262
362. Thacker, P.A.; B.G. Rossnagel. Performance and Carcass Traits of Finishing Pigs Fed Low Phosphorus Containing Diets Based on Normal Hulled or Hulless Barley of a Low-Phytate Hulless Barley with and without Phytase. *J. Anim. Vet. Adv.* **2006**, 5(5), 401-407. doi:javaa.2006.401.407
363. Thacker, P.A.; B.G. Rossnagel; V. Raboy. The Effects of Phytase Supplementation on Nutrient Digestibility, Plasma Parameters, Performance and Carcass Traits of Pigs Fed Diets Based on Low-Phytate Barley without Inorganic Phosphorus. *Can. J. Anim. Sci.* **2006**, 86(2), 245-254.
364. Varley, P.F.; J.J. Callan; J.V. O'Doherty. Effect of Phosphorus Level and Phytase Inclusion on the Performance, Bone Mineral Concentration, Apparent Nutrient Digestibility, and on Mineral and Nitrogen Utilization in Finisher Pigs. *Irish J. Agric. Food Res.* **2010**, 49(2), 141-152. doi:10.2307/41219179

365. Langbein, K.B.; J.C. Woodworth; R.D. Goodband; M.D. Tokach; J.L. Nelssen; S.S. Dritz; J.M. DeRouchey. Effects of Super-Dosing Phytase in Diets with Adequate Phosphorus on Finishing Pig Growth Performance and Carcass Characteristics. *Kansas Agricultural Experiment Station Research Reports* **2013**, 0(10), 128-131. doi:10.4148/2378-5977.7044
366. Patience, J., *Improving Nutrient Utilization and Biological and Financial Performance through the Use of Super-Dosing of Phytase in Grow-Finish Diets*. 2015, Iowa State University.
367. Pérez Alvarado, M.A.; D.A. Calderón Montañez; D. Braña Varela; J.A. Cuarón Ibargüengoytia. A Study of the Strategies of Amino Acid Value Assignment to Phytases. *Rev. Mex. Cienc. Pecu.* **2015**, 6(3), 305-314.
368. Holloway, C.L.; R. Dean Boyd; D. Koehler; S.A. Gould; Q. Li; J.F. Patience. The Impact of “Super-Dosing” Phytase in Pig Diets on Growth Performance During the Nursery and Grow-out Periods. *Transl. Anim. Sci.* **2019**, 3(1), 419-428. doi:10.1093/tas/txy148
369. Dang, D.X.; I.H. Kim. Effects of Adding High-Dosing *Aspergillus Oryzae* Phytase to Corn–Wheat–Soybean Meal-Based Basal Diet on Growth Performance, Nutrient Digestibility, Faecal Gas Emission, Carcass Traits and Meat Quality in Growing-Finishing Pigs. *J. Anim. Physiol. Anim. Nutr. (Berl.)* **2021**, 105(6), 1056-1062. doi:10.1111/jpn.13537
370. Dang, d.X.; I.H. Kim. Effects of Supplementation of High-Dosing *Trichoderma Reesei* Phytase in the Corn-Wheat-Soybean Meal-Based Diets on Growth Performance, Nutrient Digestibility, Carcass Traits, Faecal Gas Emission, and Meat Quality in Growing-Finishing Pigs. *J. Anim. Physiol. Anim. Nutr. (Berl.)* **2021**, 105(3), 485-492. doi:10.1111/jpn.13499
371. Domaćinović, M.; Z. Steiner; Đ. Senčić; Z. Antunovic; P. Mijić. Individual and Combined Usage of Enzyme Preparation and Heat-Treated Cereals in Pig Fattening. *Czech J. Anim. Sci.* **2006**, 51(4). doi:10.17221/3923-CJAS

372. Feoli, C.; J.D. Hancock; T.L. Gugle; S.D. Carter; N.A. Cole, *Effects of Adding Enzymes to Diets with Corn- and Sorghum-Based Dried Distillers Grains with Solubles on Growth Performance and Nutrient Digestibility in Nursery and Finishing Pigs*, in *Kansas State University Swine Day*. 2008, Kansas State University: Kansas. p. 104-110.
373. Benz, J.M.; J.L. Nelssen; J.M. DeRouchey; M.D. Tokach; R.D. Goodband; S.S. Dritz. Effects of an Enzyme Blend (Livestock Answer) in Diets Containing Dried Distillers Grains with Solubles on Growth Performance of Nursery and Finishing Pigs. *Kansas Agricultural Experiment Station Research Reports* **2009**, 0(10), 213-219. doi:10.4148/2378-5977.6795
374. Thacker, P.A. Effects of Supplementary Threonine, Canola Oil or Enzyme on Nutrient Digestibility, Performance and Carcass Traits of Growing-Finishing Pigs Fed Diets Containing Wheat Distillers Grains with Solubles. *Asian Australas. J. Anim. Sci.* **2009**, 22(12), 1676-1685. doi:10.5713/ajas.2009.90295
375. Ao, X.; T.X. Zhou; Q.W. Meng; J.H. Lee; H.D. Jang; J.H. Cho; I.H. Kim. Effects of a Carbohydrase Cocktail Supplementation on the Growth Performance, Nutrient Digestibility, Blood Profiles and Meat Quality in Finishing Pigs Fed Palm Kernel Meal. *Livest. Sci.* **2011**, 137(1-3), 238-243. doi:10.1016/j.livsci.2010.11.014
376. Lee, S.; H. Jung; K. Cho; J. Park; I. Kim; P. Seong; Y. Song. Effects of Corn Dried Distiller's Grains with Solubles and Enzyme Premix Supplements on Growth Performance, Carcass Characteristics and Meat Quality Parameters in Finishing Pigs. *Anim. Sci. J.* **2011**, 82(3), 461-467. doi:10.1111/j.1740-0929.2010.00848.x
377. Sitanaka, N.Y.; F.E.L. Budiño; S.R. De Oliveira; A.D.C.V. Boas; J.E. De Moraes. Enzyme Complex Supplementation on the Performance of Swine in Growth and Finishing Phases. *Rev. Caatinga* **2018**, 31(3), 748-758. doi:10.1590/1983-21252018v31n325rc

378. Lawlor, P.G.; P. Cozannet; W.F. Ryan; P.B. Lynch. Effect of a Combination Phytase and Carbohydrolase Enzyme Supplement on Growth Performance and Bone Mineralization of Pigs from Six Weeks to Slaughter at 105 Kg. *Livest. Sci.* **2019**, 223, 144-150. doi:10.1016/j.livsci.2019.01.028
379. Balasubramanian, B.; J.H. Park; S. Shanmugam; I.H. Kim. Influences of Enzyme Blend Supplementation on Growth Performance, Nutrient Digestibility, Fecal Microbiota and Meat-Quality in Grower-Finisher Pigs. *Animals* **2020**, 10(3), 386. doi:10.3390/ani10030386
380. Coelho, D.; J. Pestana; J.M. Almeida; C.M. Alfaia; C.M.G.A. Fontes; O. Moreira; J.A.M. Prates. A High Dietary Incorporation Level of Chlorella Vulgaris Improves the Nutritional Value of Pork Fat without Impairing the Performance of Finishing Pigs. *Animals* **2020**, 10(12), 1-18. doi:10.3390/ani10122384
381. Jerez-Bogota, K.; C. Sánchez; J. Ibagón; M. Jilali; P. Cozannet; A. Preynat; T.A. Woyengo. Growth Performance and Nutrient Digestibility of Growing and Finishing Pigs Fed Multienzyme-Supplemented Low-Energy and -Amino Acid Diets. *Transl. Anim. Sci.* **2020**, 4(2), 602-615. doi:10.1093/tas/txaa040
382. Huang, Y.K.; L. Zhao; H. Sun; X.M. Xu; J. Maamer; A. Preynat; L.H. Sun; D.S. Qi. A Multicarbhydrase and Phytase Complex Is Able to Compensate a Nutrient-Deficiency in Growing-Finishing Pigs. *Animals* **2021**, 11(4). doi:10.3390/ani11041129
383. Pettey, L.A.; S.D. Carter; B.W. Senne; J.A. Shriver. Effects of Beta-Mannanase Addition to Corn-Soybean Meal Diets on Growth Performance, Carcass Traits, and Nutrient Digestibility of Weanling and Growing-Finishing Pigs. *J Anim Sci* **2002**, 80(4), 1012-9. doi:10.2527/2002.8041012x

384. Pauly, C.; P. Spring; D. Gahan; J.V. Odoherly. The Effect of Cereal Type and Enzyme Supplementation on Carcass Characteristics, Volatile Fatty Acids and Intestinal Microflora and Boar Taint in Entire Male Pigs. *Animal* **2011**, 5(3), 378-386. doi:10.1017/S1751731110001849
